# Supplementary material
Source: HighWire-hosted journal article supplement (doi:10.1101/rna.080625.125)
Supplement: Supplemental_Data.docx [file Supplemental_Data.docx]

**5’ UTR Cis-Regulatory Logic Governs Ribosome Engagement on Canonical and Non-Coding RNAs (Supplementary Materials)**

# Figures

**Supplementary Figure 1**

**
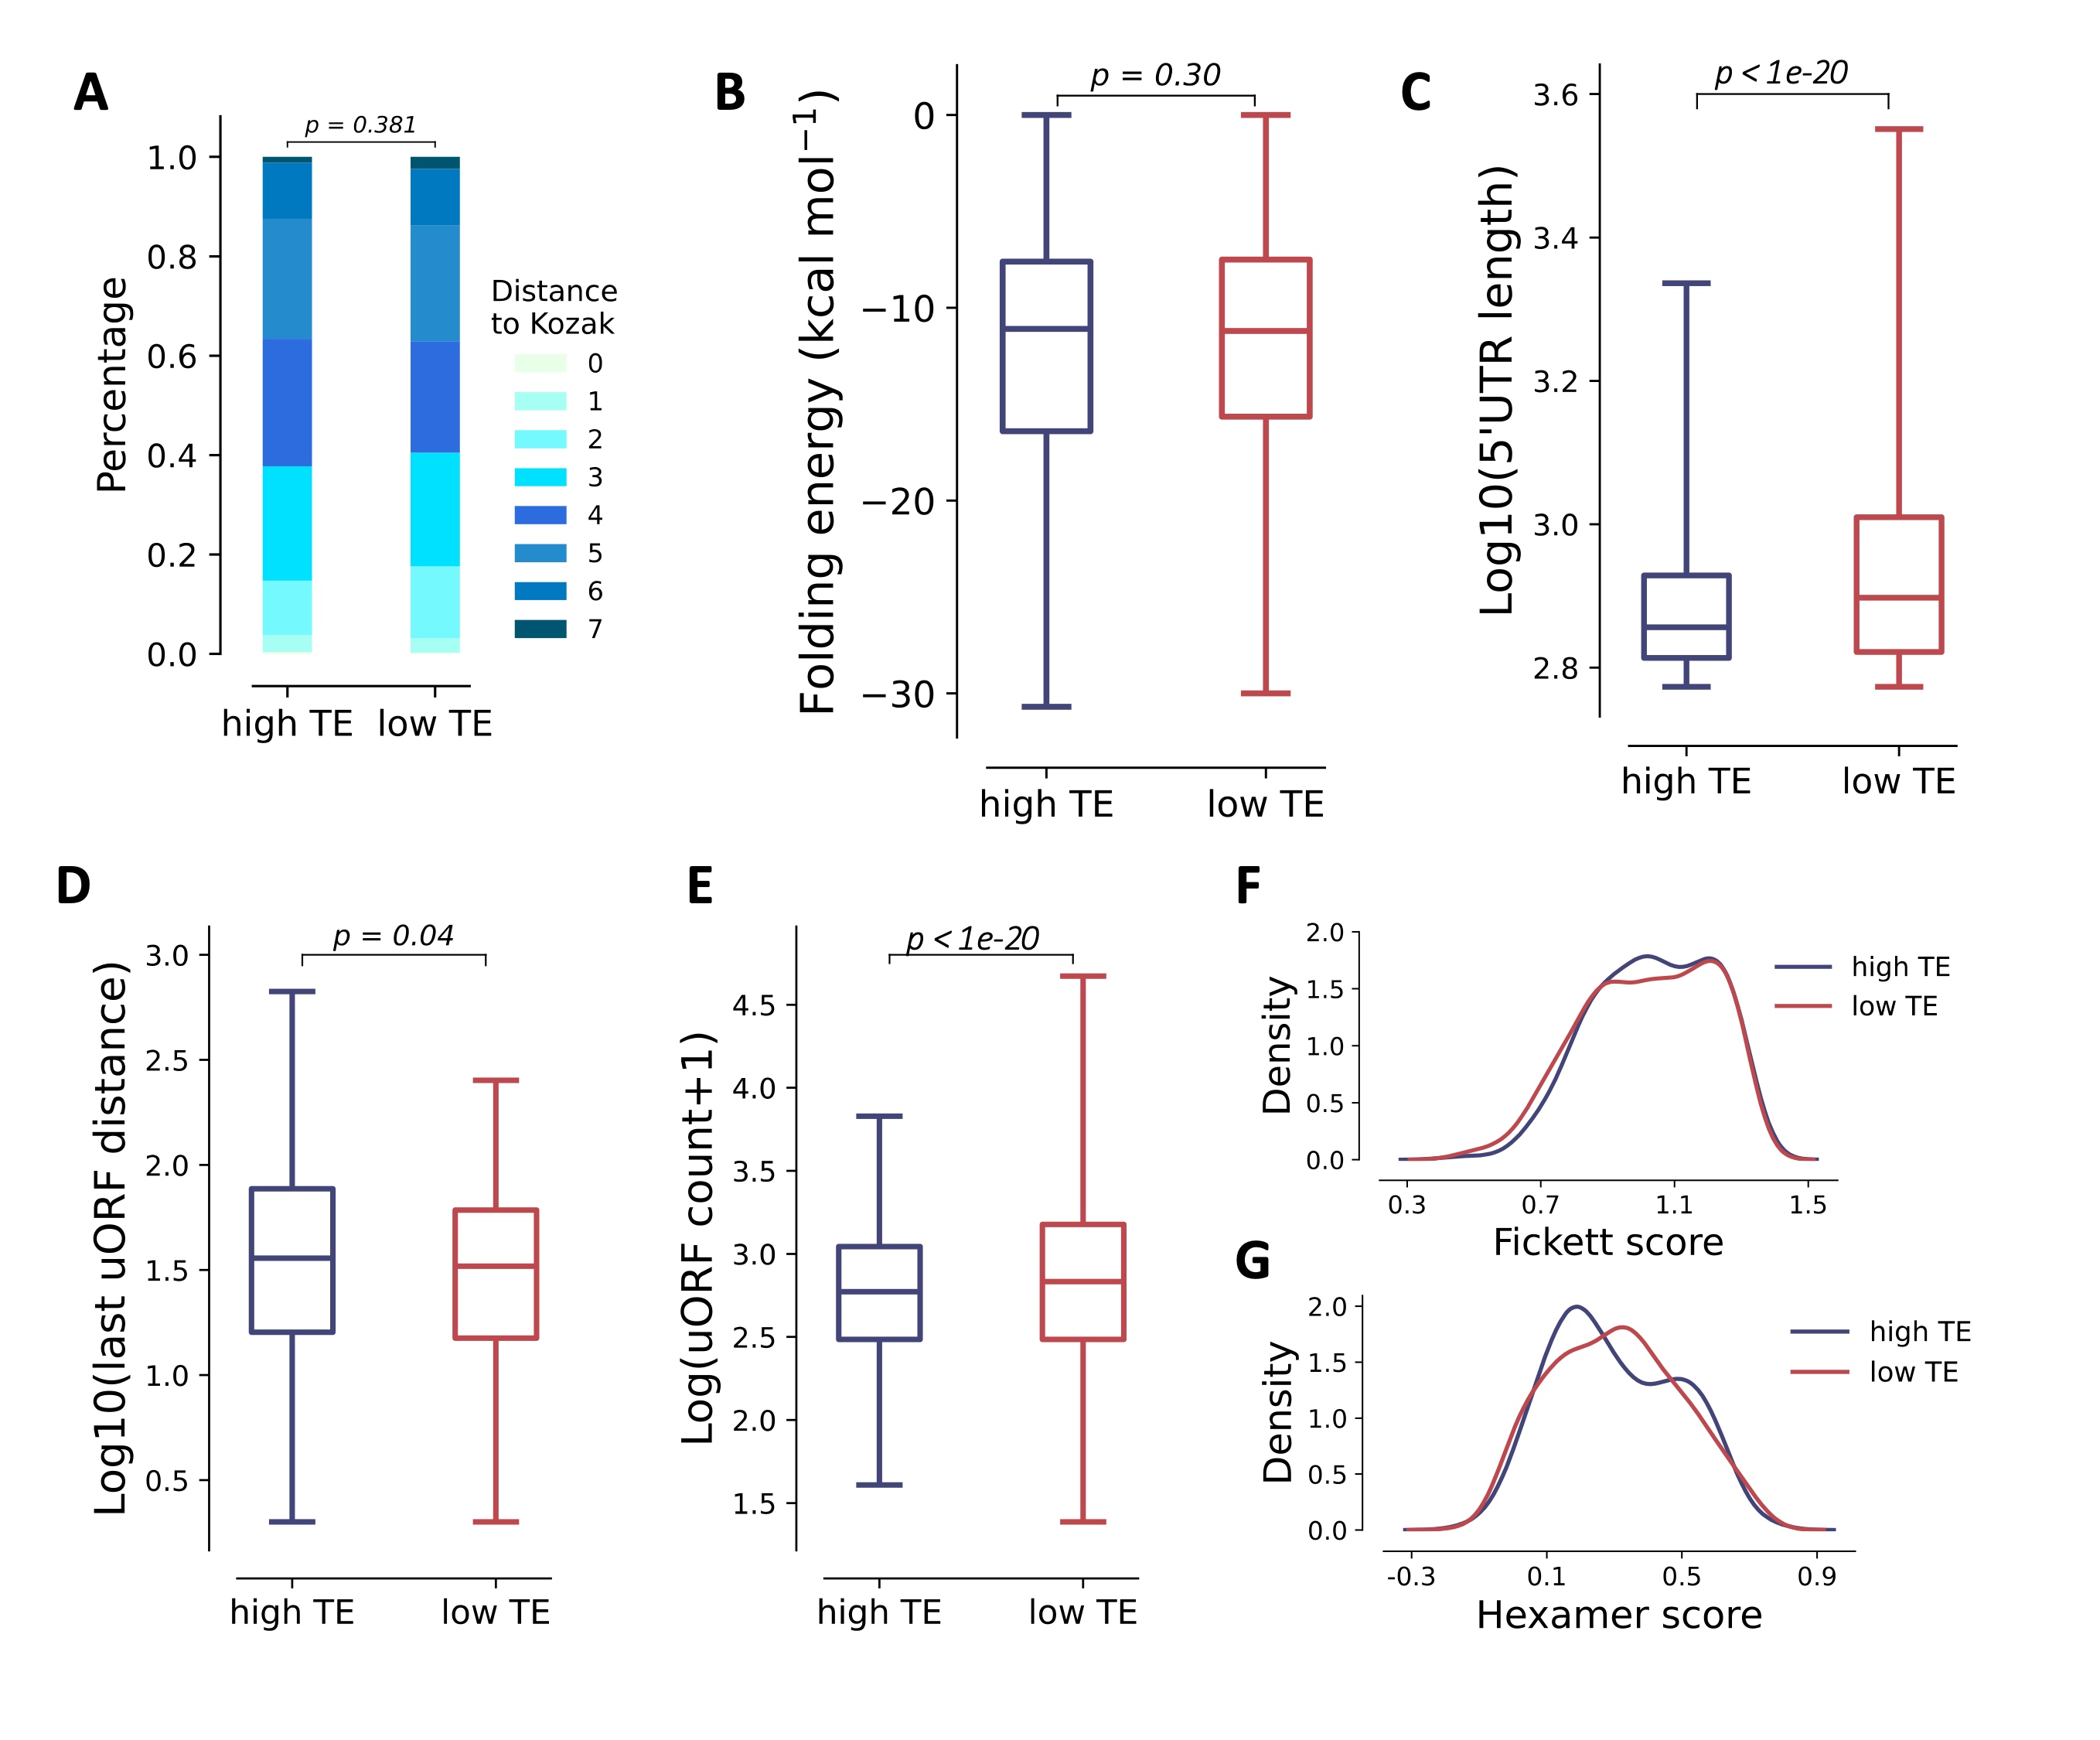
**

**Fig. S1** Comparison of translational features between mRNA with long 5' UTR grouped by translational efficiency. higher than 50th: high TE (n=265), lower than 25th: low TE (n=415). **A** The edit distance from TIS sequence to Kozak consensus sequence (One-sided Mann-Whitney U p-value=0.381). **B** The box plot of folding energy of 50-nt downstream sequence of start codon (One-sided T-Test p-value=0.30). **C** The box plot of uORFs count (One-sided Mann-Whitney U p-value<1e-20). **D** The box plot of last uORF distance (One-sided T-Test p-value=0.04). **E** The box plot of 5' UTR length (One-sided T-Test p-value<1e-20). **F and G** Fickett score and hexamer score of ORFs.

**Supplementary Figure 2**

**Fig. S2** Motifs in high TE database using MEME motif search program.

**Supplementary Figure 3**

**Fig. S3** Motifs in low TE database using MEME motif search program.

**Supplementary Table 1**

The feature importance of the model trained to predict translation efficiency in HEK, Muscle and PC3 cell lines. Please see additional file Supplementary Table 1 for details.

**Supplementary Table 2**

Runtime and memory usage of PlusCE model training across datasets.

| **Dataset (Samples)** | **Avg Time (s)** | **Std Time (s)** | **Avg Memory (MB)** | **Avg Peak (MB)** |
| --- | --- | --- | --- | --- |
| **HEK (14,410)** | 26.04 | 0.7 | 2768.88 | 3033.75 |
| **PC3 (12,579)** | 22.3 | 0.58 | 2586 | 2822.89 |
| **Muscle (1,257)** | 1.31 | 0.02 | 1417.99 | 1873.7 |
| All values are averages from three runs. All runs were conducted on a dual Xeon Gold 5218 (2.3 GHz, 64 cores) Linux server using 40 threads. | | | | |
|
|

**Supplementary Table 3**

The mean and variance of the Spearman correlation coefficients for the predictions of each model.

|  |  | ***plusCE*** | **UTR-LM** | **Cao-RF** | **MTtrans** | **RNABERT_MLP** |
| --- | --- | --- | --- | --- | --- | --- |
| **Muscle** | **mean** | 0.712 | 0.67 | 0.63 | 0.50 | 0.56 |
| **std** | 0.037 | 0.04 | 0.04 | 0.068 | 0.06 |
| **PC3** | **mean** | 0.697 | 0.65 | 0.63 | 0.54 | 0.48 |
| **std** | 0.019 | 0.02 | 0.02 | 0.023 | 0.04 |
| **HEK** | **mean** | 0.648 | 0.60 | 0.55 | 0.50 | 0.41 |
| **std** | 0.023 | 0.02 | 0.02 | 0.016 | 0.04 |
