# Supplementary material
Source: HighWire-hosted journal article supplement (doi:10.1101/rna.080625.125)
Supplement: Supplemental_info.docx [file Supplemental_info.docx]

**Supplementary Information**

**Supplementary Fig. 1** Comparison of translational features between mRNA with long 5’ UTR grouped by translational efficiency.

**Supplementary Fig. 2** Motifs in high TE database using MEME motif search program.

**Supplementary Fig. 3** Motifs in low TE database using MEME motif search program.

**Supplementary Table 1** The feature importance of the model trained to predict translation efficiency in HEK, Muscle and PC3 cell lines. Please see additional file Supplementary Table1 for details.

**Supplementary Table 2** Runtime and memory usage of PlusCE model training across datasets.

**Supplementary Table 3** The mean and variance of the Spearman correlation coefficients for the predictions of each model.
