# Supplementary material
Source: HighWire-hosted journal article supplement (doi:10.1101/rna.080625.125)
Supplement: Supplemental_Table1.xlsx [file Supplemental_Table1.xlsx]

## Sheet: HEK
Feature	Importance
high_query	0.0157384
low_query	0.00690089
kmer_ATG	0.00389702
CGperc	0.0035775
energy_Gquad_last50bp	0.00343462
energy_5cap	0.00296607
kmer_GGGC	0.00252216
kmer_GATG	0.00246261
kmer_AT	0.00245865
kmer_GG	0.00240059
kmer_GGG	0.00238007
kmer_GGCC	0.00231486
kmer_CG	0.00227749
energy_Gquad_5cap	0.00210436
kmer_GGC	0.00209957
kmer_CGG	0.00190707
kmer_GT	0.00189459
kmer_A	0.00189129
energy_last30bp	0.00189023
kmer_GC	0.00187292
kmer_T	0.00186793
kmer_GCC	0.00180314
CGratio	0.0017894
kmer_GCG	0.00176002
kmer_GTT	0.00172308
kmer_C	0.00169843
kmer_TC	0.00167613
kmer_GGCCG	0.00164368
kmer_G	0.00163978
kmer_CCG	0.00162754
kmer_CCGG	0.00159444
kmer_TT	0.00158738
kmer_CGT	0.0015424
kmer_TGG	0.0015319
kmer_CC	0.00152702
kmer_CCC	0.00151991
kmer_GGGG	0.00151467
kmer_TGA	0.00147218
kmer_CGGG	0.0014709
kmer_GGGCC	0.00145736
energy_whole	0.00144799
kmer_TTC	0.00143998
kmer_GTC	0.00143095
kmer_GCCC	0.00143093
kmer_ATGC	0.0014039
kmer_AGG	0.00140382
kmer_AG	0.00140214
kmer_CA	0.0014008
kmer_TCG	0.00139862
kmer_TG	0.00139414
kmer_TCC	0.00138252
energy_Gquad_5utr	0.00137789
kmer_TGC	0.00137611
kmer_AC	0.00136121
kmer_AA	0.00135364
kmer_CTG	0.00134916
kmer_CGGC	0.00133784
kmer_ATGA	0.00133471
kmer_GAT	0.00133281
kmer_CT	0.00132508
kmer_GCT	0.00132507
kmer_CGC	0.0013236
kmer_TA	0.0013206
kmer_GA	0.00131687
kmer_CTC	0.00131648
kmer_CCA	0.00130788
kmer_GCA	0.00130377
codon_G	0.00130276
codon_P	0.00130007
kmer_AGC	0.00129802
kmer_GGA	0.00129731
kmer_GAG	0.00128954
kmer_TGAA	0.00127563
codon_S	0.00127427
kmer_TGT	0.00127245
kmer_CAG	0.00125424
kmer_GTG	0.00124376
kmer_CCCG	0.0012427
kmer_GGGGC	0.00123833
kmer_TTG	0.00121995
kmer_GAC	0.00120786
kmer_CAC	0.00119917
kmer_ACC	0.00119391
kmer_TCT	0.00119095
ATratio	0.00118264
kmer_GCTG	0.00118217
kmer_CGA	0.00118054
kmer_CAGC	0.0011789
kmer_CCT	0.00117251
kmer_ATGG	0.00116861
kmer_CAT	0.00116647
kmer_TGGG	0.00116476
kmer_CCAG	0.00116299
kmer_AGA	0.00116088
kmer_AAT	0.00115626
kmer_GAA	0.00115606
kmer_GCCT	0.00114976
kmer_GCGG	0.0011497
kmer_CCGC	0.00112477
kmer_CTT	0.00112283
kmer_ATA	0.00111994
codon_V	0.0011198
kmer_CCGGG	0.00111026
kmer_GGT	0.00110786
kmer_AAG	0.00109723
codon_L	0.00109359
kmer_TCA	0.00109341
kmer_ACG	0.00109288
kmer_CTGG	0.00109008
kmer_CCTG	0.00108632
kmer_GCAG	0.00107962
kmer_GAGC	0.00107738
kmer_GCCG	0.00107028
kmer_GAGG	0.00106885
kmer_CTCC	0.00106228
utrlen_m80	0.00106066
kmer_ATGAG	0.00105914
codon_R	0.0010585
codon_A	0.00105715
kmer_CCGGGC	0.00105228
kmer_ACT	0.00104991
kmer_CTGC	0.00104601
kmer_CATG	0.00104286
kmer_GCCCG	0.00104177
kmer_CAA	0.00104153
kmer_GGCG	0.00103916
kmer_AGCC	0.00103908
kmer_CAGG	0.00102866
kmer_CCCA	0.00102468
kmer_GGCTG	0.00102174
kmer_GGAG	0.00101923
kmer_CCCGG	0.00101767
kmer_GGCT	0.00101384
kmer_GGCCCG	0.00100146
kmer_CCCAAG	0.0010009
kmer_AGT	0.000992269
kmer_GCCA	0.000990362
codon_T	0.000986976
kmer_TGGC	0.000986542
kmer_GGAT	0.000973689
kmer_AGGA	0.000973548
kmer_GGCGG	0.000973416
kmer_CGGGC	0.00096945
kmer_TGCC	0.000968031
kmer_GCGC	0.000960287
kmer_CGGGG	0.000959866
kmer_AGGC	0.000959831
uAUG	0.000957344
kmer_CCTC	0.000956215
kmer_GGGA	0.000952983
codon_Q	0.000950416
kmer_AAC	0.000947929
kmer_GGCA	0.000947908
kmer_ATT	0.000945111
kmer_TTT	0.000942845
kmer_CGGCC	0.000938298
kmer_GCTC	0.000936374
codon_E	0.000928596
kmer_GCTGC	0.000926388
kmer_CCCC	0.000924078
kmer_ATGAA	0.000922929
kmer_CCGA	0.000919879
kmer_CGCC	0.000917878
kmer_GGATG	0.000916755
kmer_CTGA	0.00091369
kmer_TGAG	0.000910905
kmer_AAA	0.000910893
kmer_CGCT	0.000910378
uORF	0.000908757
codon_M	0.00090854
kmer_GTGG	0.000899455
kmer_GGAC	0.000896361
kmer_GCGGC	0.000890605
kmer_TAG	0.000888027
kmer_ATC	0.000887486
kmer_GGCCC	0.000886939
kmer_TGGA	0.000878718
kmer_TCCT	0.000877086
kmer_AGGG	0.00087696
codon_*	0.000875465
kmer_CGAG	0.000873142
codon_I	0.000868716
kmer_TCCC	0.000868064
kmer_CGGA	0.000866775
codon_C	0.000866048
kmer_CTGT	0.000863792
kmer_GTTC	0.000863709
kmer_AGCG	0.000862229
kmer_TCTG	0.000855867
kmer_GACC	0.000851267
kmer_ACA	0.000846112
codon_F	0.000844222
kmer_AATG	0.000844179
kmer_CTCT	0.000843327
kmer_CGCG	0.000842858
kmer_TGTC	0.000842794
kmer_GAGA	0.000837397
kmer_GCCGC	0.000835409
kmer_CCCGA	0.00082934
kmer_CTA	0.000827891
kmer_TGCT	0.000826659
kmer_GGTG	0.000823891
kmer_TGCG	0.000818086
kmer_TTCC	0.000813198
kmer_TAA	0.000812664
kmer_GTGC	0.000805083
kmer_GTA	0.000804651
kmer_AGCT	0.000803032
kmer_CTTC	0.000802474
kmer_CACC	0.000800488
kmer_ACCC	0.000797388
codon_W	0.000796994
kmer_TCCG	0.000795625
kmer_CGGT	0.000792909
kmer_CGGGCC	0.00079279
kmer_GGAA	0.000791047
kmer_CGCA	0.000790447
kmer_CCCT	0.00078957
kmer_CTCG	0.000789211
kmer_GGCCGC	0.000789134
codon_K	0.000788818
kmer_GCCCGA	0.000784813
kmer_AGAG	0.000783385
kmer_GCCCC	0.000781511
kmer_ATGGG	0.000780953
kmer_CGTC	0.00078088
kmer_GGGT	0.000778959
codon_D	0.00077478
kmer_GTCC	0.000774612
kmer_TGGGC	0.000773021
kmer_TCGG	0.000772492
kmer_CCCGGC	0.000770704
kmer_GATGAG	0.000769155
kmer_GCCGG	0.00076874
kmer_CCAC	0.000766779
codon_H	0.000763839
kmer_GAAG	0.000760929
kmer_GTCG	0.000760859
kmer_GCTGG	0.000759613
kmer_GGCGC	0.000758636
kmer_TAC	0.00075788
kmer_CCAT	0.000755405
kmer_AAGC	0.000755331
kmer_GGCCGG	0.000753191
kmer_CCAGG	0.000750221
kmer_GCGGG	0.000734506
kmer_GGGCG	0.000731597
kmer_GTTG	0.000730859
kmer_CCGGC	0.000722293
kmer_GTGA	0.000720527
kmer_TCGC	0.000716871
kmer_CCGCG	0.000716082
kmer_GCGT	0.00071563
kmer_GCGA	0.000708874
kmer_GAGCC	0.00070747
kmer_CCTT	0.000705259
kmer_GCTCC	0.000703969
kmer_ACTG	0.000703575
kmer_CGGCG	0.000699737
kmer_GCCTC	0.000697398
kmer_GGGCT	0.00069727
kmer_TGTG	0.000696558
kmer_CTGGG	0.000695181
kmer_CCCGAG	0.000694157
kmer_GGTC	0.000690483
kmer_TCAG	0.00068786
kmer_CTTG	0.000687058
kmer_CGAC	0.000686781
kmer_GCTT	0.00068583
kmer_CCGCC	0.000684286
kmer_AGAT	0.00068403
kmer_TGCA	0.000683405
kmer_TCTC	0.000679606
kmer_CAGA	0.000676917
kmer_TCTT	0.000675937
kmer_TTGC	0.000675365
kmer_GAGT	0.000673953
kmer_AGCCC	0.00067224
kmer_CTTT	0.000666278
kmer_TCCA	0.000661007
kmer_ACGC	0.000659021
kmer_TTGG	0.000652727
kmer_ACCG	0.000651352
kmer_GGGCCC	0.000647934
kmer_AGTG	0.00064654
kmer_GAGCCC	0.000646119
kmer_TTCA	0.000645401
kmer_AAGG	0.00064392
kmer_GTCT	0.00064383
kmer_CGCGG	0.000643245
kmer_TTCT	0.000641789
kmer_ACTC	0.000638757
kmer_TAT	0.000638603
kmer_CACT	0.000637967
kmer_TTA	0.00063746
kmer_AGCA	0.000636266
kmer_CGCAG	0.000634654
kmer_TTTC	0.000633056
kmer_CCAGC	0.000632682
kmer_CTCCC	0.000632021
kmer_GGTT	0.000631839
kmer_CGGGGC	0.000631512
kmer_ACCA	0.000630385
kmer_AAAG	0.00062963
kmer_GAAC	0.000629598
codon_N	0.000625342
kmer_AGAA	0.000623763
kmer_ACAG	0.000621054
kmer_CGCCC	0.00062003
kmer_GATGG	0.00061832
kmer_GGGGG	0.000617768
kmer_CAGCC	0.000617403
kmer_GGGCCG	0.00061711
kmer_GACA	0.000616822
kmer_GGCTC	0.000615699
kmer_TCCAGC	0.000615679
kmer_GGCTGG	0.000613794
kmer_CTCA	0.000613253
kmer_GAGGC	0.000610903
kmer_AGGAG	0.000610267
kmer_CATC	0.000608328
kmer_AGGT	0.000608171
kmer_GAGGA	0.000607632
kmer_CGGAG	0.000607256
kmer_GACG	0.000607058
kmer_CGCCG	0.000605854
kmer_CCCGC	0.000605811
kmer_GGAGG	0.000605561
kmer_GCAA	0.000605373
kmer_TTCG	0.000603852
kmer_CGTG	0.000603757
kmer_GCAC	0.000602266
kmer_TTTG	0.000601932
kmer_CTGCC	0.00060146
kmer_TGGT	0.000601233
kmer_CCCCG	0.000601067
kmer_CCTGG	0.000600087
kmer_GCCTG	0.000599995
kmer_CCGAGC	0.000598564
kmer_CAGT	0.000596737
kmer_GCGGA	0.000596728
kmer_GACT	0.00059549
kmer_GCAGC	0.000593801
kmer_AAGA	0.000591592
kmer_CAAG	0.00059007
kmer_CCCAG	0.000587622
kmer_GTGT	0.000584052
kmer_CGTT	0.000582819
kmer_GCCCA	0.000582441
kmer_ACCT	0.000582356
kmer_CCAA	0.000580154
kmer_GCGCC	0.000578735
kmer_CCTCC	0.000578383
kmer_CCGGGG	0.000577471
kmer_CCGT	0.000576735
kmer_CCCAA	0.000574942
kmer_ATGCCC	0.000574275
kmer_GAAA	0.000573834
kmer_CCATG	0.000572004
kmer_CCGAG	0.000570176
kmer_ATGGC	0.000569878
kmer_GGAGC	0.00056815
kmer_TGAGC	0.000562916
kmer_GCCCGG	0.000561678
kmer_CGGCGG	0.00056078
kmer_GACCC	0.000560034
kmer_CTGAG	0.000559184
kmer_GTTT	0.000557615
kmer_GCGCG	0.000555183
kmer_GGGAG	0.000554964
kmer_TCCGC	0.000552829
kmer_TGAT	0.000551188
kmer_GGGCGG	0.000550116
kmer_ATGAGG	0.000549416
kmer_GGCCT	0.000549375
kmer_AGTC	0.000547042
kmer_ATGT	0.00054604
kmer_ACGG	0.000543772
kmer_TGCCC	0.000543537
kmer_CGACC	0.000543505
kmer_GCTCT	0.000542902
kmer_AGCTG	0.000540552
kmer_CAGGG	0.000537137
kmer_GCGGCG	0.000536911
kmer_ACGCA	0.000534921
kmer_AACTA	0.000533985
kmer_GGGCTG	0.000533737
kmer_TGTT	0.000533052
kmer_TTGA	0.000532356
kmer_AGGCC	0.000532074
kmer_CCCCA	0.000530837
kmer_ACAC	0.000530594
kmer_AGCCG	0.000527415
kmer_CTGGC	0.000525213
kmer_GAATG	0.000524812
kmer_GGGGA	0.000520368
kmer_CACA	0.00051922
kmer_GCTGCC	0.000518256
kmer_AGAC	0.000518118
kmer_CGCGC	0.000517681
kmer_TGCTG	0.000516088
kmer_TGGCC	0.000514836
kmer_GGGGCC	0.000513948
kmer_CAGCG	0.000512921
kmer_GGCAG	0.000512909
kmer_GCAGG	0.000511825
kmer_GCGGCC	0.000511717
kmer_CGCCT	0.000511136
kmer_CAGGA	0.000509433
kmer_CACG	0.000507497
kmer_GCGCT	0.00050697
kmer_CCCCC	0.000506792
kmer_TGGAG	0.0005067
kmer_GATGC	0.000506396
kmer_CATGG	0.000504913
kmer_TGGGCC	0.000503793
kmer_CGGGGG	0.000503305
kmer_TGAC	0.00050318
kmer_GGAGA	0.000502799
kmer_CGGCCG	0.000501216
kmer_GGTGG	0.000501183
kmer_CCCTG	0.000498043
kmer_ATCC	0.000497704
kmer_AAAT	0.000496799
kmer_CTCGG	0.00049514
kmer_GGAAG	0.000495122
kmer_TTGT	0.000494474
kmer_CACCC	0.000494432
kmer_CTCCT	0.000493121
kmer_CCTGC	0.000492411
kmer_TGCGG	0.00049174
kmer_GCCGGG	0.000490641
kmer_GAAT	0.000490548
kmer_CGGCT	0.000489025
kmer_CTGCG	0.000489003
kmer_CGGGCG	0.000488238
kmer_TCCCC	0.000487655
kmer_GGGAC	0.000487065
kmer_AGGCG	0.000485778
kmer_CCTCG	0.000485339
kmer_TGAAA	0.000485042
kmer_CCGCT	0.000483798
kmer_AAGT	0.000482409
kmer_TCAT	0.000481747
kmer_TCAC	0.000480003
kmer_TGGCG	0.000479521
kmer_CTCCG	0.000478593
kmer_GGCAC	0.000478522
kmer_CGCTG	0.000477831
kmer_GCCCT	0.000474316
kmer_TCCTC	0.000471117
kmer_CCCGGG	0.000471099
kmer_TATG	0.000470847
kmer_GCTA	0.000469567
kmer_AGCCCG	0.000469329
kmer_AGTT	0.000468697
kmer_GAAGA	0.000467655
kmer_GCCAG	0.000465749
kmer_GGCCA	0.000465144
kmer_AGGGG	0.000464507
kmer_GCCGCG	0.000464168
kmer_CGGCA	0.000464111
kmer_GTCA	0.000463703
kmer_TCCAG	0.000463057
kmer_GCCGCC	0.000462708
kmer_TCGGG	0.000461369
kmer_CCTTC	0.000461364
kmer_CCATGC	0.000461196
kmer_TGGGG	0.000461142
kmer_CGCCGC	0.00046077
kmer_TCAGG	0.000460519
kmer_CAGGC	0.000460107
kmer_TCGT	0.000460056
kmer_GGCTGC	0.000458664
kmer_ATGCC	0.000457811
kmer_GGGAGA	0.000457052
kmer_GGCGGC	0.000456101
kmer_CTAG	0.000455527
kmer_CCCAC	0.00045453
kmer_CTAA	0.000454307
kmer_GCCTCC	0.000453955
kmer_GCAT	0.00045233
kmer_CGCTC	0.00045208
kmer_GATC	0.000451554
kmer_GGCGGG	0.000451553
kmer_AACA	0.000450481
kmer_ATGGA	0.000449857
kmer_TGGGA	0.000448603
kmer_GAGGG	0.000448519
kmer_GGGTG	0.000448154
kmer_CAAA	0.000447082
kmer_TTCTC	0.000447079
kmer_GTGGG	0.000446296
kmer_ATATG	0.000446137
kmer_CTGCT	0.00044591
kmer_GAGCG	0.000444879
kmer_AGCCT	0.000444601
kmer_TCCCG	0.000444243
kmer_CGCCA	0.000443148
kmer_TTTT	0.000442337
kmer_CTCGC	0.000441675
kmer_CTTCC	0.000441059
kmer_ACTA	0.000440633
kmer_CCGCCA	0.000440339
kmer_GGCCCC	0.00044007
kmer_AACC	0.000438787
kmer_AGCGG	0.00043836
kmer_TAGC	0.000437853
kmer_CCCTC	0.000437816
kmer_GTGGC	0.000437576
kmer_GCGGGG	0.000435348
kmer_AGCGC	0.000434852
kmer_GGGTC	0.000434832
kmer_TGAGG	0.00043433
kmer_AGGGC	0.000433911
kmer_TAGG	0.000432159
kmer_CGCCCG	0.000430922
kmer_ATGTT	0.000429537
kmer_GGCCTG	0.000428831
kmer_CACCA	0.000425355
kmer_TCTGG	0.000424836
kmer_GAGAG	0.000423984
kmer_CTCAG	0.00042282
kmer_AATGA	0.000422424
kmer_AATT	0.000421346
kmer_CCGCCC	0.000420897
kmer_TCTCC	0.000420092
kmer_CAAC	0.000417888
kmer_CCGCGG	0.000417384
kmer_CTAC	0.000417243
kmer_GCAGA	0.000416539
kmer_CTGGA	0.00041632
kmer_GGGGT	0.000414447
kmer_CAACTA	0.000414284
kmer_GGGCA	0.000413135
kmer_GATGA	0.000412924
kmer_ACTT	0.000412903
kmer_ATCT	0.000411188
kmer_CGAA	0.000411039
kmer_CCTGA	0.000410832
kmer_CCCCT	0.000410275
kmer_CGGGA	0.000410258
kmer_GTGGA	0.000410067
kmer_AGGCT	0.000409383
kmer_GAGCT	0.000409325
kmer_GCGCCG	0.000408956
kmer_TGCTC	0.000408361
kmer_CCTCT	0.00040735
kmer_TCCCT	0.000407102
kmer_AGGCCG	0.000406646
kmer_GGGAA	0.000405148
codon_Y	0.000404795
kmer_AAGCC	0.00040425
kmer_GCGCCC	0.000404246
kmer_CCGCCG	0.000403696
kmer_TTCCC	0.0004011
kmer_AGCAG	0.000400853
kmer_GGCGA	0.000400025
kmer_AAAC	0.000399485
kmer_GCTGA	0.000399017
kmer_TGCCT	0.000398327
kmer_AAATA	0.000397898
kmer_CCACC	0.000396579
kmer_TCTGC	0.000395668
kmer_TCCATG	0.000395659
kmer_GCCTT	0.000395594
kmer_CTGCA	0.000395414
kmer_GCCAT	0.00039462
kmer_ATTCT	0.000394611
kmer_TCCGG	0.000394473
kmer_ACAA	0.000394468
kmer_TCCTG	0.00039435
kmer_CGAGC	0.000393853
kmer_CCGTC	0.000393798
kmer_GGTCC	0.000393743
kmer_CCCCGA	0.000393715
kmer_GTCCC	0.000393536
kmer_CTGTG	0.000391503
kmer_GCTGT	0.000390988
kmer_GCCTGG	0.000390769
kmer_AGATG	0.000390757
kmer_CCATGG	0.000390412
kmer_AAAA	0.000389349
kmer_CCGGA	0.000388254
kmer_GGGGGC	0.000388142
kmer_GCCCCG	0.000388003
kmer_CCTA	0.000387814
kmer_TGGCT	0.00038771
kmer_AACT	0.000386777
kmer_CGCGGC	0.00038544
kmer_CTCTG	0.000385026
kmer_TGCAG	0.000384715
kmer_AAAGC	0.000384669
kmer_TCTGT	0.000383025
kmer_ACAT	0.000382709
kmer_TGCCG	0.000382048
kmer_TGCGC	0.00038016
kmer_GAAGC	0.000379315
kmer_CCAAG	0.000378472
kmer_GCGGAG	0.000377989
kmer_ATTC	0.000377702
kmer_CCAGGA	0.000377321
kmer_AATGAA	0.000376768
kmer_ACCCC	0.000376714
kmer_GCCGA	0.000376515
kmer_GTGCC	0.000376236
kmer_TGATG	0.000375837
kmer_ATGGGC	0.000375471
kmer_GCCAC	0.000374
kmer_CAGAG	0.000373708
kmer_GAAGG	0.000373496
kmer_GCTGGG	0.000373448
kmer_GATT	0.000373181
kmer_GCGCTG	0.000372742
kmer_CGAGG	0.000372372
kmer_AGAGG	0.000372294
kmer_CGGTG	0.000371115
kmer_AGAAG	0.000370362
kmer_CATGC	0.000369763
kmer_TCGCC	0.000369702
kmer_TGCCA	0.000368275
kmer_TAAT	0.000367733
kmer_AGCCA	0.000367442
kmer_CAGGGG	0.000367065
kmer_GCCGGC	0.000366942
kmer_GCGTC	0.000366881
kmer_TGGCGG	0.000366011
kmer_AGTA	0.00036597
kmer_CCTCA	0.000365958
kmer_TGTGG	0.000365648
kmer_CATT	0.000365646
kmer_CAGTG	0.000365597
kmer_GGACT	0.000365451
kmer_GTAG	0.000364752
kmer_GCGAG	0.000364042
kmer_GCGCGG	0.0003636
kmer_AAACAA	0.000363561
kmer_TCATGA	0.000363418
kmer_CAGCT	0.000362616
kmer_TAAA	0.000362447
kmer_CCCCGG	0.000361818
kmer_ATGAAA	0.000361581
kmer_CCGTG	0.000361491
kmer_GGGCCT	0.000361227
kmer_CCGCCT	0.000360885
kmer_TTCGCA	0.000360271
kmer_TCGGC	0.000359612
kmer_CGGCGC	0.000359338
kmer_GAGGCC	0.000359295
kmer_GCGCA	0.000357166
kmer_TAAG	0.000356703
kmer_GTGAA	0.000356315
kmer_CCGGT	0.000355792
kmer_GGAGGC	0.000355749
kmer_TTTCC	0.000355731
kmer_ATGGCC	0.000354585
kmer_ATTG	0.000354396
kmer_GACCCC	0.000354045
kmer_TCCCA	0.000353692
kmer_GCTCG	0.000353377
kmer_TTCGG	0.000352293
kmer_GCTGCT	0.000352025
kmer_TCTA	0.000351968
kmer_GGCGCC	0.000351771
kmer_GCCAGG	0.000351499
kmer_TGCCCC	0.000351286
kmer_ACAGTG	0.000351235
kmer_CGGGT	0.000351013
kmer_CTCTTT	0.000350923
kmer_GCCCGC	0.00035058
kmer_GTCGC	0.000350332
kmer_GAGGAG	0.000349978
kmer_TACC	0.000349276
kmer_GTCTC	0.000349262
kmer_GTTCG	0.000349061
kmer_GGACC	0.000349035
kmer_TGTACA	0.000348868
kmer_GGGAT	0.000348771
kmer_CTGGT	0.000348621
kmer_CCCAGG	0.00034846
kmer_CAAT	0.000348303
kmer_CCGAC	0.00034823
kmer_GAACT	0.000347099
kmer_CCGGCG	0.000346891
kmer_TTAG	0.000346269
kmer_AGGTG	0.000345771
kmer_GGGGCG	0.00034577
kmer_CCGGCC	0.000344839
kmer_GGACA	0.000344646
kmer_AATA	0.000343725
kmer_GGCTCC	0.000343219
kmer_CCCCCA	0.000342658
kmer_GGTGC	0.000342124
kmer_AAGCTT	0.000340694
kmer_GAGCA	0.000339574
kmer_CTGAC	0.00033829
kmer_CCCGAC	0.000338286
kmer_ATCA	0.000337984
kmer_CCTCCC	0.000337728
kmer_GGAAC	0.00033763
kmer_GCGGGC	0.000336693
kmer_TTTA	0.000336676
kmer_CCCGCC	0.000336254
kmer_GTCTG	0.000336047
kmer_GGAGCC	0.000335775
kmer_GTATGA	0.000335589
kmer_TTCTG	0.000335477
kmer_CTCCA	0.000334837
kmer_GTGAG	0.000333745
kmer_AAATG	0.000333697
kmer_CTGTT	0.000333116
kmer_TCGA	0.000333088
kmer_GCGTG	0.000333052
kmer_CGCGGG	0.000332582
kmer_ATTT	0.000332424
kmer_GCGACC	0.000332339
kmer_GGCATG	0.000331934
kmer_GGGCGC	0.000331685
kmer_TGTTG	0.000331481
kmer_GCCCCC	0.000331029
kmer_GTTCC	0.000330699
kmer_ACGGG	0.000330401
kmer_CAGCCG	0.000330258
kmer_ATAT	0.000329902
kmer_TGAGCC	0.000329502
kmer_CAGGAC	0.000329235
kmer_TGAAG	0.000328817
kmer_CAGGT	0.000328408
kmer_GTGCG	0.000327563
kmer_AGCCCC	0.000327426
kmer_ACCCG	0.000327317
kmer_AATC	0.000327034
kmer_ACCTG	0.000326936
kmer_ACAGC	0.000326888
kmer_ACCCT	0.000325894
kmer_CAGCCT	0.000324891
kmer_CACAG	0.000324823
kmer_AGGAGG	0.000324328
kmer_AGAGC	0.000324079
kmer_CTCCGC	0.00032347
kmer_ATGAGC	0.000323213
kmer_CTGTC	0.000322758
kmer_TTGGG	0.000322635
kmer_AGGGA	0.000322584
kmer_GCCCCA	0.00032258
kmer_CCCGT	0.000322297
kmer_TGTCG	0.000322207
kmer_CTCTC	0.000321734
kmer_TTTTC	0.000321478
kmer_CTGCTG	0.00032143
kmer_GTCCT	0.000320335
kmer_CTTCA	0.00032028
kmer_CCAGT	0.000319419
kmer_GCTTG	0.000318996
kmer_AGCTC	0.000318934
kmer_ACCCCG	0.000318577
kmer_CGTCC	0.000318561
kmer_TGTA	0.000317796
kmer_TGGAA	0.000317555
kmer_GGAGT	0.00031651
kmer_GCACC	0.000316503
kmer_CTCTT	0.000316445
kmer_CGTGG	0.000316445
kmer_TGGCA	0.000315756
kmer_CGAT	0.000315214
kmer_AGGCA	0.000314566
kmer_GCGGT	0.000314373
kmer_CCAGA	0.000313825
kmer_TAGA	0.000313574
kmer_TGGTG	0.000313168
kmer_GAGGGC	0.000312714
kmer_GACGG	0.000312684
kmer_TATGA	0.000310929
kmer_AGGAA	0.00031085
kmer_TCAA	0.000310552
kmer_AGCGGC	0.000310451
kmer_TATGAG	0.000310308
kmer_GGAGAG	0.000310075
kmer_CCTGAG	0.000309996
kmer_AGGAT	0.000309968
kmer_GCAGCG	0.000309914
kmer_CGAGCC	0.000309882
kmer_TGAAC	0.000309812
kmer_GAGAA	0.000309672
kmer_GGTA	0.000309382
kmer_GGTGT	0.000308545
kmer_GCTTC	0.00030819
kmer_CTGCCT	0.0003071
kmer_GCCATG	0.000306539
kmer_TCTCT	0.000306533
kmer_TTGCG	0.000306373
kmer_CCGGCA	0.00030628
kmer_TGCCTC	0.000305924
kmer_CAGCA	0.000305839
kmer_CGGCTG	0.000305292
kmer_CTTCT	0.00030463
kmer_TGGAT	0.000303877
kmer_TTAA	0.000303783
kmer_CACTG	0.000303722
kmer_GGTCT	0.000303717
kmer_CGACCC	0.000303606
kmer_CTTCG	0.000303086
kmer_CCCGCG	0.000303014
kmer_AAGCT	0.000302878
kmer_CGCCTC	0.000302876
kmer_TTTTG	0.000302239
kmer_AAGGG	0.000302203
kmer_GGTGA	0.000302119
kmer_CCTCCT	0.000302036
kmer_GAAAG	0.000302019
kmer_GGCGT	0.000301988
kmer_CGACG	0.000301633
kmer_CCCCGC	0.0003014
kmer_TTCCT	0.000301188
kmer_GGAAA	0.000300749
kmer_GGTGCC	0.000300562
kmer_GATGTG	0.00030046
kmer_GTCCG	0.000299875
kmer_GTAC	0.000299135
kmer_GTCGG	0.000299004
kmer_ATCG	0.000298343
kmer_CCTTG	0.000298257
kmer_GCTTT	0.000297964
kmer_AAGGA	0.000297933
kmer_TGGCCC	0.000297548
kmer_TCAGC	0.000297174
kmer_GCCGCT	0.000296845
kmer_CTGAA	0.000296675
kmer_TGGAGG	0.000296592
kmer_GATGGG	0.000296539
kmer_ACGA	0.000295545
kmer_CGGCCC	0.000295406
kmer_CTGCGG	0.000295235
kmer_GAGGT	0.000295117
kmer_GGTTG	0.000295019
kmer_CGGAC	0.000294938
kmer_CATGA	0.000294751
kmer_GGCGCG	0.00029424
kmer_ACGT	0.000294024
kmer_ACATG	0.000293742
kmer_GGACG	0.000293672
kmer_AAGCTG	0.000293546
kmer_AGGAGC	0.000293518
kmer_CGCCGG	0.000293502
kmer_CCTGGC	0.000293418
kmer_AATGG	0.000293162
kmer_GGCAGC	0.000293087
kmer_TATT	0.000293051
kmer_CTTTTT	0.000292464
kmer_CCCCAG	0.000292091
kmer_CCCTT	0.000291521
kmer_GAAAC	0.000290426
kmer_AGGAC	0.000289986
kmer_TACA	0.000289299
kmer_GTTGC	0.000288441
kmer_GCGGCT	0.000287676
kmer_CCCAGC	0.000287662
kmer_TGGCTG	0.000287382
kmer_CCTCGG	0.000286379
kmer_CGTCG	0.000285916
kmer_TACT	0.000285855
kmer_AGGCAC	0.000285853
kmer_CCACT	0.000285743
kmer_GACTG	0.000285693
kmer_ATGCG	0.000285655
kmer_GCTGGT	0.000285351
kmer_CGGCAC	0.000285233
kmer_GGAGCT	0.000285095
kmer_GCCTCG	0.000284096
kmer_TTCAG	0.000284073
kmer_GGATC	0.000283967
kmer_CGCGCC	0.000283403
kmer_AGTGC	0.000283383
kmer_ACCAG	0.000283306
kmer_CCAGCT	0.000283039
kmer_GATCC	0.000281654
kmer_CCTGGG	0.000281613
kmer_GTGCT	0.000281056
kmer_TTAC	0.000281017
kmer_ACGCAG	0.000281014
kmer_GAGCGG	0.000280851
kmer_CCGCA	0.00028061
kmer_CTTTG	0.000280352
kmer_AGCGCC	0.00027998
kmer_GATAGG	0.000279714
kmer_CACGG	0.000279631
kmer_TTTCA	0.000279554
kmer_ACACT	0.000278946
kmer_ACTGC	0.000278906
kmer_GTGGT	0.00027842
kmer_GGGTCT	0.000278153
kmer_GATA	0.000278065
kmer_GCCGT	0.00027794
kmer_CCTGT	0.000277726
kmer_TGCCCA	0.000277655
kmer_GTAT	0.000277591
kmer_AACG	0.000277566
kmer_CTTTC	0.000277431
kmer_CCTCTC	0.000277373
kmer_CTCGGG	0.000276841
kmer_GGCGGA	0.000276243
kmer_AGAGA	0.000275986
kmer_GTTA	0.00027565
kmer_TGTCC	0.000275623
kmer_CAGGAG	0.00027498
kmer_AAAGCG	0.000274913
kmer_CAAAG	0.00027445
kmer_AGGATG	0.000274444
kmer_CTTTT	0.000274402
kmer_GGCTT	0.000274254
kmer_TCGCG	0.000273604
kmer_GGGCTC	0.000273365
kmer_GAGAC	0.000273284
kmer_TCCGCC	0.000273226
kmer_CCGCGC	0.000272794
kmer_TCTCG	0.000272528
kmer_GCCCAG	0.000272297
kmer_GACCA	0.000272289
kmer_AGTTGA	0.000272099
kmer_AGACA	0.000271676
kmer_CATGAA	0.000271629
kmer_ACCGC	0.000271605
kmer_ATGGCG	0.000271532
kmer_CCATC	0.000271351
kmer_CGGCCA	0.00027111
kmer_TCCTT	0.000270694
kmer_TGCCTT	0.000270539
kmer_AGTGA	0.000270309
kmer_CTGGCT	0.000270284
kmer_GTGCCC	0.000269693
kmer_CCCACC	0.000269638
kmer_TCACC	0.000269629
kmer_TTTTT	0.000269322
kmer_AAGGC	0.000269153
kmer_GTAA	0.000268548
kmer_CTTA	0.000268471
kmer_GAAGCC	0.000268414
kmer_TCTTC	0.000267943
kmer_CGGCTA	0.000267694
kmer_TCGCAA	0.000267677
kmer_GTCCA	0.000267609
kmer_GGGAGC	0.000267458
kmer_CTCCTC	0.000267312
kmer_GAATGA	0.000267261
kmer_AGGGGC	0.000267025
kmer_CAGCCC	0.000266761
kmer_GCTCCC	0.00026597
kmer_GGGTT	0.000265596
kmer_GTGAC	0.000265331
kmer_GGGAGG	0.000265287
kmer_GCACT	0.000265187
kmer_GATGT	0.000264461
kmer_CACCG	0.000264091
kmer_CCCCTC	0.000264023
kmer_GCTCCG	0.000263982
kmer_CTCCCC	0.000263553
kmer_GGCTTG	0.000263219
kmer_TGGGT	0.000263056
kmer_TCTGA	0.000262857
kmer_CGCCCC	0.000262319
kmer_GTGCCT	0.000261926
kmer_CCAGGC	0.000261813
kmer_GCTCA	0.000261637
kmer_TTGAG	0.000261479
kmer_CGCTGC	0.000261379
kmer_AGCTGC	0.000261215
kmer_CACCAT	0.00026092
kmer_ACTCAA	0.00026087
kmer_CTTGG	0.000260665
kmer_GTTCT	0.000260423
kmer_GAGTC	0.000260336
kmer_GGAAGG	0.000260304
kmer_TTTCT	0.000260281
kmer_GCAGT	0.000260214
kmer_AAGAG	0.000259848
kmer_CGTGC	0.000259582
kmer_CGCAGC	0.000259237
kmer_GGTTT	0.000258882
kmer_GCAGGG	0.000258645
kmer_AGCTT	0.000258575
kmer_CCGCAG	0.000258477
kmer_GCGCTC	0.000258464
kmer_AGCCGG	0.000258085
kmer_CAAGC	0.000257966
kmer_CTTGC	0.000257885
kmer_ACGGC	0.000257827
kmer_GCGAC	0.000257561
kmer_TCGGCC	0.000257548
kmer_TGGAC	0.000257113
kmer_GACCTA	0.000256647
kmer_AGTGG	0.000256198
kmer_AAATAC	0.000256013
kmer_CCGCTC	0.000255934
kmer_CTCCCG	0.000255583
kmer_TCCCCG	0.000254804
kmer_GACAG	0.000254643
kmer_AGGTT	0.000254553
kmer_TGACC	0.000254422
kmer_CAAGG	0.000254281
kmer_CCGACC	0.000254213
kmer_AAGAA	0.000253449
kmer_CGGCTC	0.00025335
kmer_GAACTA	0.000253253
kmer_GCTGCG	0.000253142
kmer_CGGGCA	0.000253142
kmer_GACAC	0.000253079
kmer_CGTA	0.000252943
kmer_GTTGG	0.000252687
kmer_CTTTGC	0.000252602
kmer_GCTCGG	0.000252586
kmer_GACCT	0.000252349
kmer_TAGT	0.000252186
kmer_CCGCTG	0.000252098
kmer_TTGTT	0.000251681
kmer_TGTGC	0.000251564
kmer_CGATG	0.000251538
kmer_AAGTG	0.000251027
kmer_CCCTCC	0.000250914
kmer_TCCCGG	0.000250734
kmer_TGGAGC	0.000250608
kmer_GAGGCG	0.000250391
kmer_GGTCTC	0.000250313
kmer_CGCTT	0.000250178
kmer_CCCCTG	0.000249988
kmer_ACTCC	0.000249828
kmer_AAGCG	0.000249798
kmer_TCGCT	0.000249359
kmer_GCAGCC	0.000249091
kmer_GATGGC	0.000248973
kmer_TCATG	0.00024888
kmer_GACGC	0.000248498
kmer_AAAAT	0.00024789
kmer_ATGCT	0.00024778
kmer_ATGTTT	0.000247635
kmer_AGAAA	0.000247597
kmer_AGCCTC	0.000247595
kmer_ACTAC	0.000247557
kmer_CTGGGG	0.000247414
kmer_GAGCCA	0.000246914
kmer_CCCCAC	0.000246787
kmer_GGAGGA	0.000246382
kmer_CATCCG	0.000246354
kmer_GACCG	0.000246309
kmer_ACAGA	0.000245771
kmer_GGCAA	0.000245525
kmer_CTCAGG	0.000245519
kmer_CTCCTG	0.000245249
kmer_GGGGAG	0.00024501
kmer_GGCACG	0.000244711
kmer_GTGGGC	0.0002444
kmer_TGAAGC	0.000244345
kmer_TCCAT	0.000244329
kmer_CGGAGC	0.000244277
kmer_AGGCCC	0.00024425
kmer_CTGAGG	0.000244019
kmer_GGAGGG	0.00024397
kmer_CCACA	0.000243773
kmer_CGGCAG	0.000243638
kmer_GAGCCG	0.000243501
kmer_ATATGC	0.00024311
kmer_GCCACG	0.000242178
kmer_TCTTT	0.000241938
kmer_CATCC	0.000241779
kmer_GGGGAC	0.000241717
kmer_TGGGGG	0.000241656
kmer_ATAG	0.000241583
kmer_ACACC	0.000241343
kmer_CATGCC	0.000241279
kmer_TTCCG	0.000240918
kmer_CGCAC	0.000240355
kmer_CGGGAG	0.00024009
kmer_CAGAT	0.000240001
kmer_GGTTC	0.000239901
kmer_CCCCCG	0.00023972
kmer_TATC	0.000239497
kmer_GGGGCT	0.000239338
kmer_AAAGG	0.000239316
kmer_TTCGGG	0.000239282
kmer_GTTTC	0.000239106
kmer_CATGT	0.000238562
kmer_CCCTCT	0.000238488
kmer_ACCAGG	0.000238462
kmer_CTAT	0.000238142
kmer_GGCCTC	0.000238052
kmer_CAGAC	0.000237771
kmer_AGGGAC	0.000237249
kmer_CTGAGC	0.00023695
kmer_TTCGC	0.000236881
kmer_GGGGGA	0.000236794
kmer_CGGTC	0.00023669
kmer_TTTGC	0.000236683
kmer_CTGGGC	0.000236438
kmer_CACCT	0.000236285
kmer_CCCTGA	0.000236241
kmer_GCTCCT	0.000235968
kmer_GTGTG	0.000235499
kmer_CTGAT	0.000235367
kmer_TCACCC	0.000235354
kmer_AACAA	0.000235289
kmer_CCCCGT	0.000235046
kmer_CGGAA	0.000234894
kmer_GTAATG	0.000234425
kmer_CATCT	0.000234231
kmer_GGCGCT	0.000234197
kmer_CGCGA	0.000234073
kmer_CAGAA	0.000234068
kmer_ATGTC	0.000233933
kmer_AGTCC	0.000233842
kmer_GGAGCG	0.000233633
kmer_TGCGGG	0.000233619
kmer_GTCCCC	0.000233144
kmer_GGGAAG	0.000233124
kmer_CCTTT	0.000233032
kmer_GCAGGA	0.000233022
kmer_AAGAT	0.0002326
kmer_CATGCG	0.000232441
kmer_GTCTT	0.000232112
kmer_TTTGG	0.000231611
kmer_CCGTCG	0.000231528
kmer_GAGCTG	0.000231392
kmer_CGTCT	0.000231353
kmer_TCGTG	0.000231291
kmer_CATGGC	0.000231241
kmer_CGCAGG	0.000231176
kmer_ATGGCT	0.000230851
kmer_GTGCTC	0.000230171
kmer_TTGGA	0.000230094
kmer_TGGTC	0.000230035
kmer_ACCTC	0.000229937
kmer_GAAAA	0.000229927
kmer_TGAGA	0.000229902
kmer_AGCAA	0.000229823
kmer_ATAA	0.000229676
kmer_TATCCT	0.00022962
kmer_GGCAGG	0.000229017
kmer_AGCCGC	0.000228887
kmer_TCTTG	0.000228884
kmer_GGAAT	0.000228732
kmer_ACAGT	0.000228474
kmer_ACCATG	0.000228217
kmer_CGGGCT	0.00022796
kmer_GCCCAA	0.00022754
kmer_CTAGCG	0.000227299
kmer_GCAAG	0.000227219
kmer_AATGC	0.0002272
kmer_AAAAG	0.000227081
kmer_CCTCAG	0.000227036
kmer_TCCCGC	0.000226905
kmer_CGGCGA	0.000226725
kmer_CCAGCC	0.000226383
kmer_CGCGT	0.00022635
kmer_CGAAG	0.000225954
kmer_AGGCGG	0.000225858
kmer_TTCTT	0.000225465
kmer_AAGCA	0.000225398
kmer_TGCTCC	0.000225226
kmer_CAGTC	0.000225145
kmer_TCGGA	0.000224939
kmer_TAAAT	0.000224904
kmer_GCCACC	0.000224836
kmer_AGGGT	0.000224802
kmer_GCATG	0.000224461
kmer_CGACA	0.000224107
kmer_GCGCAG	0.000224031
kmer_ATCTC	0.000223132
kmer_TACG	0.000223004
kmer_CAGCTC	0.000222961
kmer_CTGCTC	0.000222939
kmer_GGGCAG	0.000222778
kmer_TAGGA	0.000222544
kmer_CACCCT	0.000222426
kmer_TTGCC	0.000222262
kmer_GCCCTG	0.000222157
kmer_CGCTCC	0.000222111
kmer_GGACTT	0.000222103
kmer_CAGCGC	0.000221982
kmer_GAGCAG	0.000221962
kmer_CCTCCG	0.000221952
kmer_TTGGC	0.000221874
kmer_GAGTG	0.000221651
kmer_GTAAT	0.000221612
kmer_GCGTT	0.000221341
kmer_TCCAC	0.00022102
kmer_GGTCCC	0.000220956
kmer_CTGCCG	0.000220497
kmer_AGGTC	0.000220399
kmer_TCTGGC	0.000220351
kmer_CTCGCC	0.000220154
kmer_GCCTCT	0.000220009
kmer_GCTCTG	0.000219946
kmer_GAGAT	0.000219739
kmer_CTGCAG	0.000219065
kmer_CGTCGC	0.000218788
kmer_CTCGGC	0.00021867
kmer_TCGCCC	0.000218607
kmer_CCCGTG	0.000218257
kmer_TGCGGC	0.000218243
kmer_CTTCCC	0.000218039
kmer_TCCGGG	0.000217924
kmer_TCCTGC	0.000217889
kmer_CCCGCT	0.000217809
kmer_AGCAGC	0.00021765
kmer_AAGCCC	0.000217542
kmer_CTCCGG	0.000217524
kmer_CCTGCC	0.000217482
kmer_CAGCAG	0.000217246
kmer_GATGCC	0.000217243
kmer_GGTGGC	0.000217145
kmer_TGAGGA	0.000216919
kmer_ACTGG	0.000216815
kmer_TGAGCG	0.00021671
kmer_CTTTCC	0.000216703
kmer_GAGCGC	0.000216251
kmer_AAACA	0.000215677
kmer_GATTCT	0.000215652
kmer_GAGGGG	0.0002156
kmer_ACCAT	0.000215317
kmer_CGCGTC	0.000215117
kmer_GGAGCA	0.000215061
kmer_CTCTCG	0.000215039
kmer_GCTGAG	0.000215009
kmer_TGAGT	0.000214933
kmer_CCAGGG	0.000214805
kmer_TCCCCC	0.000214748
kmer_GGAACT	0.000214692
kmer_GCCGAG	0.000214615
kmer_ACTGA	0.000214271
kmer_CCGGGA	0.000214139
kmer_CTCAT	0.000214034
kmer_GTGCCA	0.000213953
kmer_GACTC	0.000213434
kmer_CTGGCC	0.000213432
kmer_CCGGTG	0.000213335
kmer_CGGTT	0.000213262
kmer_GTGGCA	0.000212982
kmer_CACTC	0.000212967
kmer_CCCTGG	0.000212915
kmer_ACGCC	0.000212707
kmer_AGCAC	0.000212663
kmer_GTTGA	0.00021228
kmer_GAGAGC	0.000212224
kmer_CTCGT	0.000211675
kmer_GCGGGA	0.000211484
kmer_CCGAA	0.000211431
kmer_CTCAC	0.000211259
kmer_CCGGCT	0.000211237
kmer_GCCAA	0.000211235
kmer_GGATGG	0.000211201
kmer_GTGTC	0.000211073
kmer_TAATT	0.000210911
kmer_AGCTGG	0.000210558
kmer_CTAGC	0.000210518
kmer_CAAGA	0.000210404
kmer_GCTTCG	0.000209954
kmer_ACAGG	0.000209839
kmer_CCACG	0.000209637
kmer_TTGCT	0.000209527
kmer_CACGC	0.000209494
kmer_GTTTT	0.000208744
kmer_GCGAGG	0.000208055
kmer_GTCGCC	0.000207957
kmer_TGTGT	0.000207751
kmer_TTTGA	0.000207664
kmer_CTTCTC	0.000207558
kmer_GGTCG	0.000207164
kmer_CGGCCT	0.000207109
kmer_ATGTG	0.00020661
kmer_TTAT	0.000206583
kmer_ACCCTT	0.000206549
kmer_TTCAC	0.000206504
kmer_TGTTGA	0.000206409
kmer_TCCTAA	0.000206016
kmer_CTGGAG	0.000205991
kmer_CAGCGG	0.000205717
kmer_CATCG	0.000205188
kmer_TTGTG	0.000205085
kmer_AACCT	0.000205012
kmer_TCCAGA	0.000204893
kmer_AAAGA	0.000204715
kmer_GGGACA	0.0002047
kmer_GTATG	0.000204324
kmer_GGCCAT	0.000204276
kmer_ACTGT	0.000204244
kmer_ACAAG	0.000204002
kmer_GGATGA	0.000203806
kmer_GGGATG	0.000203398
kmer_CATGGG	0.000203336
kmer_GAAGT	0.000203196
kmer_GCAAA	0.000203161
kmer_ATTCTG	0.000203031
kmer_GCCTCA	0.000202857
kmer_TGGCAG	0.000202385
kmer_ACTCA	0.000202358
kmer_TGTCT	0.000202327
kmer_CTAAT	0.000202302
kmer_TGGCCG	0.000202292
kmer_CATCA	0.000202164
kmer_TGTTT	0.000201993
kmer_CTGGCG	0.000201936
kmer_TTTTCA	0.000201623
kmer_TTTGT	0.000201583
kmer_AAGAGC	0.00020158
kmer_GCAAC	0.000201401
kmer_GCCGGT	0.000201374
kmer_ACCCA	0.000201324
kmer_TGCTA	0.000201288
kmer_GCACG	0.000201179
kmer_TGCAGC	0.000200691
kmer_GACCAG	0.000200543
kmer_CGCGCG	0.000200277
kmer_AGCAGG	0.00020017
kmer_TAATGG	0.000200128
kmer_CACGGC	0.000199223
kmer_AGATGG	0.000199122
kmer_CAACCT	0.0001991
kmer_TGGGCG	0.000199022
kmer_TCCCAG	0.00019901
kmer_CCTTCC	0.000198882
kmer_TTGTC	0.000198729
kmer_CGAGCG	0.000198572
kmer_GCGGCA	0.000198524
kmer_CATA	0.000198464
kmer_TCACT	0.000198461
kmer_CGACGG	0.000198423
kmer_CGCTCT	0.000198357
kmer_CGGAGA	0.000198326
kmer_TATA	0.000198238
kmer_GCGTCC	0.00019822
kmer_GACAT	0.000197926
kmer_AGAAC	0.000197866
kmer_GGAGAA	0.000197834
kmer_AACTAC	0.000197732
kmer_TCTGTG	0.000197588
kmer_GCGCGC	0.000197544
kmer_AGAAGA	0.000197377
kmer_AATAA	0.000197051
kmer_ACCCGG	0.000196714
kmer_GGGTCC	0.000196524
kmer_CTGCCC	0.000196461
kmer_AAGGT	0.000196359
kmer_TCTAG	0.000196203
kmer_CAGGCC	0.000195926
kmer_AGTTC	0.000195881
kmer_CCCTGC	0.0001957
kmer_GCCTGC	0.000195442
kmer_TTCCCC	0.000195304
kmer_ATGGGA	0.000194873
kmer_TACCC	0.000194647
kmer_TCCCAA	0.000194602
kmer_TCGGGA	0.000194347
kmer_GGTGGG	0.000194324
kmer_GCAGCA	0.000194237
kmer_TTGCGC	0.000194045
kmer_TCTCA	0.000194018
kmer_CCACTT	0.000193875
kmer_GGCCAG	0.000193693
kmer_ATCCT	0.000193554
kmer_CTCAGC	0.000193516
kmer_ACTAG	0.000193128
kmer_ACCAC	0.000193063
kmer_AGCCAG	0.000192769
kmer_TGTTC	0.000192697
kmer_TTGAA	0.00019265
kmer_GATGCT	0.000192588
kmer_AGGCGC	0.000192367
kmer_GGCCAC	0.00019225
kmer_TTCAT	0.000192206
kmer_GGCACC	0.000192075
kmer_GGGACC	0.000192064
kmer_CCCCCC	0.000192044
kmer_GGGGTA	0.000191432
kmer_GTCAG	0.000191422
kmer_AGACC	0.000191329
kmer_GATTTA	0.000191171
kmer_TTCTCC	0.000190745
kmer_TGGAAA	0.000190477
kmer_GGATT	0.000190459
kmer_GGGGTC	0.000190227
kmer_CATGAG	0.000190138
kmer_CCAGCG	0.000190091
kmer_CAGGGC	0.000189908
kmer_AGGCTG	0.000189381
kmer_TGCTGG	0.000189348
kmer_ACTTT	0.00018927
kmer_GTTTG	0.000189155
kmer_GTGTT	0.000189046
kmer_CGGTTC	0.000189033
kmer_CCACCC	0.000189005
kmer_TGGGCT	0.000188779
kmer_AGCGA	0.000188656
kmer_GAAAT	0.000188639
kmer_TAAGA	0.000188541
kmer_CTCCCT	0.000188465
kmer_GGGGCA	0.000188416
kmer_GCACCC	0.000188366
kmer_CTGCGC	0.000188314
kmer_CGTCCG	0.000188303
kmer_ATGCGG	0.000188067
kmer_ACCACT	0.000187944
kmer_AGGGAG	0.000187595
kmer_ACGGGC	0.00018734
kmer_CTTGA	0.000187293
kmer_GGGATC	0.000187285
kmer_TGGATG	0.00018723
kmer_AGGAGA	0.000187208
kmer_GACAGT	0.000187148
kmer_CCGAGG	0.000187006
kmer_TCCTA	0.00018692
kmer_GAACC	0.000186836
kmer_TGGAAG	0.000186586
kmer_AGCGT	0.000186487
kmer_TGACA	0.000186433
kmer_TTTCG	0.000186375
kmer_CAGTGG	0.000186115
kmer_TCTTTC	0.00018603
kmer_CTAGG	0.000185692
kmer_CAAGT	0.000185299
kmer_CTAAG	0.000185141
kmer_CTCCAG	0.000185051
kmer_ACGCG	0.00018505
kmer_TCTCCA	0.000184964
kmer_GTGAGG	0.000184887
kmer_CAGGGA	0.000184859
kmer_CCCCAA	0.000184828
kmer_CTCCAT	0.000184817
kmer_ACAATC	0.000184807
kmer_TCACA	0.00018467
kmer_TCCTGG	0.000184264
kmer_GTGTTG	0.000184143
kmer_GTTGT	0.000183976
kmer_GCTAC	0.000183964
kmer_AGTTG	0.000183962
kmer_TCCCCT	0.000183946
kmer_ACCGG	0.00018394
kmer_TGCGA	0.000183918
kmer_CGGTCC	0.000183866
kmer_GATAG	0.000183775
kmer_ACCCTG	0.000183554
kmer_CTGGAA	0.000183527
kmer_GAGTT	0.000183259
kmer_GTCTGG	0.000183163
kmer_TCCCCA	0.000182998
kmer_AACCC	0.000182992
kmer_CCTCTG	0.000182916
kmer_TAAGCT	0.000182735
kmer_GTTCGG	0.000182596
kmer_TAAC	0.000182551
kmer_AGTCT	0.000182435
kmer_GTGGCG	0.000182224
kmer_GCCTTG	0.000182169
kmer_GGTCA	0.000182141
kmer_TACTC	0.000182028
kmer_TGCTGC	0.000181923
kmer_CCTGGA	0.000181688
kmer_GGTTGC	0.000181644
kmer_CAGTT	0.000181317
kmer_TGTGA	0.00018102
kmer_ACCCAA	0.000180915
kmer_TCCGCG	0.00018088
kmer_AGCTCC	0.000180764
kmer_CGAAAT	0.000180622
kmer_CTACT	0.000180544
kmer_AGCCCA	0.000180164
kmer_AACAAC	0.000179702
kmer_GGCAT	0.000179656
kmer_CACAGC	0.000179545
kmer_AATGGA	0.000179538
kmer_CCGGTC	0.000179518
kmer_CACCCG	0.00017941
kmer_GGGGTG	0.00017932
kmer_CCTGCG	0.000179084
kmer_GGCCCA	0.000179038
kmer_CGGGTG	0.000178938
kmer_GATCT	0.000178856
kmer_AGGAAG	0.000178805
kmer_TGCCAG	0.000178643
kmer_AATGT	0.000178499
kmer_CGGTGG	0.000178407
kmer_CAGAAG	0.000178351
kmer_TTGGT	0.000178321
kmer_TCGGGC	0.000178297
kmer_GGCCGA	0.000178225
kmer_TCGCCG	0.000178189
kmer_ATGCA	0.00017814
kmer_TGGCTT	0.000178117
kmer_ATCCG	0.000178042
kmer_TGAGGC	0.000177994
kmer_GCCAGC	0.000177878
kmer_GTTGAG	0.000177802
kmer_GACGGG	0.00017753
kmer_GACAA	0.000177277
kmer_CAAAA	0.00017724
kmer_CGCGGA	0.000177158
kmer_TGGAGA	0.000177149
kmer_GCAGGC	0.000177065
kmer_TGCTT	0.000176957
kmer_GAATGT	0.000176946
kmer_CCGGAG	0.000176922
kmer_AGCGAG	0.000176827
kmer_CTGAGA	0.000176715
kmer_GCCTTC	0.000176551
kmer_ATCCGG	0.000176548
kmer_TGGGAG	0.000176403
kmer_TGAAT	0.000176399
kmer_GGCTAG	0.000176358
kmer_CTCTCC	0.000176333
kmer_GCTTTC	0.000176197
kmer_TAGAT	0.000176097
kmer_ATCCC	0.000176023
kmer_TGCCGC	0.000175913
kmer_GCACCA	0.000175797
kmer_CGAGGC	0.00017579
kmer_ATGAGA	0.000175778
kmer_GGTCCA	0.000175586
kmer_CGGGGA	0.000175556
kmer_CTCCCA	0.000175523
kmer_AAAACA	0.000175498
kmer_GGCGAC	0.000175468
kmer_GCATAT	0.000175399
kmer_CCGCGA	0.000175212
kmer_TTAGGA	0.00017521
kmer_GAGAGG	0.000175129
kmer_GCCCCT	0.00017491
kmer_CACCCA	0.000174882
kmer_GGACAT	0.000174702
kmer_TGGTT	0.000174671
kmer_AGAGT	0.000174569
kmer_TCAGGG	0.000174535
kmer_CCACTG	0.000174348
kmer_GAACA	0.000174341
kmer_GGCTGT	0.000174289
kmer_CGAGA	0.000174274
kmer_AACAAG	0.000174255
kmer_CTGTA	0.000174084
kmer_ATGGAA	0.000174075
kmer_CATTT	0.000174067
kmer_CAGCTG	0.000174008
kmer_GCCGAC	0.000173878
kmer_CGGAGG	0.000173512
kmer_TTGTAA	0.000173435
kmer_TCCTTC	0.000173247
kmer_GTGCGG	0.000173218
kmer_TTCTGG	0.000173213
kmer_AACTG	0.000173193
kmer_CACCGC	0.000173164
kmer_CGAGT	0.000172973
kmer_ATTTA	0.000172714
kmer_GTGCA	0.00017271
kmer_CGCCTT	0.000172595
kmer_CCGCGT	0.000172436
kmer_CTCTGC	0.000172279
kmer_TGGCGC	0.000172256
kmer_GAAAGG	0.000172215
kmer_ACTTG	0.000172142
kmer_GCGAA	0.000172038
kmer_CGACT	0.000171903
kmer_GAAGCT	0.000171882
kmer_ATCCA	0.000171744
kmer_ACTAA	0.000171667
kmer_GAGCTC	0.000171421
kmer_TGACT	0.000171239
kmer_GAGGGA	0.000171194
kmer_GGATCC	0.000171172
kmer_GGACCC	0.000171154
kmer_GGCTCG	0.000170988
kmer_TAAAA	0.00017096
kmer_CTGGTC	0.000170929
kmer_GGGTGA	0.000170746
kmer_CCGGGT	0.000170708
kmer_GGCGGT	0.000170611
kmer_ACTCT	0.000170578
kmer_TACCTT	0.00017045
kmer_CGACCG	0.000170407
kmer_GCTGGC	0.000170327
kmer_GGAGTG	0.000170222
kmer_GATGCA	0.000170158
kmer_GACACC	0.000170125
kmer_ATTTTG	0.000170051
kmer_GCCCAT	0.000169945
kmer_GCGCCT	0.000169801
kmer_AATCC	0.000169712
kmer_TTTAA	0.000169654
kmer_ATGTTG	0.000169575
kmer_AACAAT	0.000169423
kmer_CAGAGG	0.000169352
kmer_ACGGT	0.000169157
kmer_AATACC	0.000168976
kmer_TGTCA	0.000168866
kmer_AGCTGA	0.000168809
kmer_ATGGT	0.00016872
kmer_ATTA	0.00016864
kmer_GCAGCT	0.000168476
kmer_CTGGGA	0.000168412
kmer_AAGGCC	0.000168394
kmer_TGATGG	0.000168394
kmer_TCCGA	0.000168277
kmer_GTGAAG	0.000168129
kmer_CACTT	0.000168102
kmer_CTACC	0.000168039
kmer_GATTT	0.000167939
kmer_GTCTGT	0.00016793
kmer_GTCCTG	0.000167789
kmer_ACTTC	0.000167692
kmer_CACCTG	0.000167604
kmer_AGCGCT	0.000167518
kmer_TTGTCT	0.000167466
kmer_CTTCGA	0.000167256
kmer_AGAAAC	0.00016724
kmer_GTCCAG	0.000167152
kmer_TCCCTC	0.000166889
kmer_GTCTA	0.00016685
kmer_CTGTGT	0.000166801
kmer_CATTCT	0.000166514
kmer_GCATC	0.000166462
kmer_CTTGT	0.000166357
kmer_GTGGGA	0.000166303
kmer_TTACCC	0.000166185
kmer_GCGGTG	0.000166131
kmer_GGTTTC	0.000166121
kmer_GCCGCA	0.000166016
kmer_GTGGCC	0.000165946
kmer_ATAC	0.000165938
kmer_GCATGG	0.000165632
kmer_TGTCCC	0.000165564
kmer_AATTT	0.000165546
kmer_AGCGGG	0.000165497
kmer_TTGGGG	0.000165166
kmer_GTGCGC	0.000165022
kmer_ATCAT	0.000164976
kmer_CATGTT	0.000164933
kmer_TTTTTT	0.000164719
kmer_CATGGA	0.000164628
kmer_GTGGAG	0.000164294
kmer_CGCTCG	0.000164263
kmer_TCGGT	0.00016407
kmer_ATCAC	0.000164064
kmer_GCTGGA	0.000164016
kmer_GTTGTC	0.000163955
kmer_AGGGTG	0.000163866
kmer_TGGTGG	0.000163838
kmer_GACCCG	0.000163805
kmer_AACTC	0.000163671
kmer_TAAGC	0.00016337
kmer_TTCGT	0.000163213
kmer_CTTCAT	0.000163158
kmer_TTCCA	0.000163115
kmer_AATTC	0.000162936
kmer_TTGAC	0.000162909
kmer_ACGAG	0.000162822
kmer_CAGGCG	0.0001626
kmer_AGAAGC	0.000162599
kmer_AGGGCG	0.00016256
kmer_GATGGA	0.000162497
kmer_TCCCTG	0.000162303
kmer_CAGAGC	0.000162105
kmer_AAGCCG	0.000162104
kmer_AGTCG	0.000161847
kmer_AGGTTA	0.000161713
kmer_GGGTTG	0.000161642
kmer_GCCCTC	0.000161549
kmer_GAGCCT	0.0001615
kmer_TGTAA	0.000161487
kmer_CGTGGG	0.000161398
kmer_CTCTGG	0.000161375
kmer_TCGCGG	0.000161337
kmer_ACCTGC	0.000161305
kmer_GTAATA	0.000161078
kmer_CGACTG	0.000160829
kmer_AGCAAA	0.000160793
kmer_GAGTCC	0.000160621
kmer_GTGAGC	0.000160542
kmer_AGGGGG	0.000160488
kmer_TCCGTC	0.000160228
kmer_AGGTGG	0.000160011
kmer_TCCTCC	0.000159417
kmer_GTCCGC	0.000159388
kmer_GGCTGA	0.000159339
kmer_TCAGCC	0.000158961
kmer_TCGGCT	0.00015892
kmer_CGTCCT	0.000158787
kmer_GTCTCT	0.000158607
kmer_ATCTG	0.000158566
kmer_GTGGGG	0.000158487
kmer_CTGGTG	0.000158457
kmer_ACAGCC	0.000158451
kmer_GGAAGA	0.000158404
kmer_ATTTT	0.000158089
kmer_GAGATG	0.000157935
kmer_AGACG	0.000157811
kmer_GCCTGA	0.000157706
kmer_GGACTC	0.000157653
kmer_AATCCG	0.000157525
kmer_TTCCCA	0.000157501
kmer_AGCCTG	0.000157384
kmer_AAGGAG	0.000157327
kmer_TAGGC	0.000156969
kmer_GAGCGA	0.000156921
kmer_CGTTG	0.000156864
kmer_TTTCCC	0.000156739
kmer_CCTGTA	0.000156584
kmer_CCCGGA	0.00015648
kmer_AACAG	0.00015646
kmer_CGCCCT	0.00015643
kmer_AGCGCG	0.000156295
kmer_AAGCCT	0.000156127
kmer_CAGCCA	0.000156066
kmer_ATCTCT	0.000156061
kmer_GCTCGC	0.000156018
kmer_TTCATT	0.000155971
kmer_AGTACA	0.000155825
kmer_GGCATA	0.000155741
kmer_TCTCCC	0.000155706
kmer_TTGCA	0.000155679
kmer_CCCAGT	0.000155511
kmer_TGAAGA	0.000155438
kmer_ACCCCC	0.00015541
kmer_AGGGCT	0.000155327
kmer_ACGGCT	0.000155225
kmer_AAAGT	0.000155222
kmer_TCAGA	0.000155185
kmer_GAGGAA	0.000155074
kmer_GGATTC	0.000154895
kmer_CGCGCT	0.000154784
kmer_GAGAAG	0.00015478
kmer_TTTCTG	0.000154755
kmer_TTTTA	0.000154595
kmer_GGGGAT	0.000154578
kmer_CCCACT	0.000154577
kmer_GCTGTG	0.000154534
kmer_CCAAA	0.00015448
kmer_ACATC	0.000154311
kmer_ATCCTT	0.000154071
kmer_AAAGGA	0.000153909
kmer_TCAAG	0.000153901
kmer_CTCAA	0.000153833
kmer_AAGATG	0.000153542
kmer_CCACCA	0.000153457
kmer_GGTGGA	0.000153316
kmer_CGCCTA	0.000153281
kmer_AGGGCC	0.000153269
kmer_AGAAT	0.000153259
kmer_ATGAC	0.000153244
kmer_CTTAC	0.000153224
kmer_GCTCAG	0.00015309
kmer_CTGGGT	0.000153061
kmer_CGCCCA	0.000152967
kmer_GCGTGG	0.000152876
kmer_TGCTGA	0.000152745
kmer_TATGG	0.000152705
kmer_TGACG	0.000152686
kmer_CCTTCT	0.000152534
kmer_GTGGAC	0.0001525
kmer_TGGCCA	0.000152444
kmer_TTAGG	0.000152392
kmer_ATGGAG	0.000152245
kmer_CAGATG	0.000152174
kmer_TCCGGC	0.00015192
kmer_CACAT	0.000151844
kmer_CTGCCA	0.000151597
kmer_GACTT	0.000151585
kmer_TGAATG	0.000151577
kmer_TAGCC	0.00015137
kmer_GGTGGT	0.000151339
kmer_GAAGAG	0.000151083
kmer_TGCAA	0.000151047
kmer_GCACA	0.000150988
kmer_AGGGCA	0.000150856
kmer_GACCGC	0.000150765
kmer_GGGTAA	0.000150723
kmer_ACCTT	0.000150703
kmer_GCCGTG	0.000150644
kmer_TTCATC	0.000150635
kmer_CGCCTG	0.000150591
kmer_CTCAAA	0.000150522
kmer_CCAAT	0.000150438
kmer_CACCAG	0.000150118
kmer_CCATCC	0.000150117
kmer_ATTTG	0.000150107
kmer_CTCGCG	0.000150007
kmer_CGCAGA	0.000149981
kmer_CACTA	0.000149837
kmer_TGTAAT	0.000149696
kmer_CCCTCG	0.000149674
kmer_CTAGA	0.000149612
kmer_CAACC	0.000149373
kmer_GATTC	0.000149222
kmer_CCCGGT	0.000148977
kmer_CAGGCT	0.000148971
kmer_CCTCGC	0.000148875
kmer_CCAAC	0.000148861
kmer_TAGGGG	0.000148727
kmer_CACAC	0.000148647
kmer_CCTGAC	0.000148604
kmer_GAAATG	0.000148518
kmer_GCTCAC	0.000148421
kmer_GGCGAG	0.000148374
kmer_ATGAT	0.000148323
kmer_GCAGAG	0.000148208
kmer_TCCAGG	0.000148195
kmer_TACCCA	0.000148093
kmer_CGTGA	0.000148047
kmer_CTACCC	0.000147784
kmer_AGTGT	0.000147746
kmer_AGCCAC	0.000147591
kmer_GCCGTC	0.000147554
kmer_CTGTGG	0.000147547
kmer_AACAT	0.000147512
kmer_CAAGCA	0.000147388
kmer_AATAAT	0.000147207
kmer_CTGACC	0.000147033
kmer_GCGAGC	0.000146882
kmer_CTCTTC	0.000146821
kmer_ATAAT	0.000146765
kmer_GGCAAG	0.000146744
kmer_GGCTA	0.000146731
kmer_GACGT	0.000146702
kmer_ACGTG	0.000146613
kmer_TACAG	0.00014652
kmer_GCTAAC	0.000146462
kmer_CGCCGA	0.000146446
kmer_AGGCCT	0.000146417
kmer_GGAAGC	0.000146383
kmer_GGGGAA	0.000146133
kmer_GCGGAC	0.000146027
kmer_GGATGT	0.000146007
kmer_GTCCGG	0.000145754
kmer_ATGGTG	0.000145711
kmer_TAGCGG	0.000145676
kmer_CTGTCT	0.000145624
kmer_AACAC	0.000145611
kmer_GCAAGG	0.000145531
kmer_GTGCCG	0.000145528
kmer_TGAGCA	0.000145483
kmer_TGTTTT	0.000145405
kmer_ATCCAA	0.000145392
kmer_GGTGAG	0.000145266
kmer_TGTGGC	0.000145187
kmer_TAGGG	0.00014503
kmer_GGGTGG	0.000144961
kmer_CACTGA	0.000144947
kmer_GCCTA	0.000144793
kmer_GGAGAC	0.000144766
kmer_AATAT	0.00014464
kmer_CGCTGT	0.00014462
kmer_TGTTAC	0.000144478
kmer_GAAGAT	0.0001444
kmer_TAATG	0.00014438
kmer_GTAGC	0.000144377
kmer_TGAGAG	0.000144225
kmer_TCGTC	0.0001442
kmer_CCTTCA	0.000144053
kmer_AGACT	0.000144037
kmer_TCTTTG	0.000143983
kmer_CAGGCA	0.000143914
kmer_CCAGCA	0.000143889
kmer_GCTCGT	0.000143713
kmer_CTACTC	0.000143618
kmer_TTTCGC	0.000143516
kmer_CTCGA	0.000143334
kmer_GATCCA	0.000143264
kmer_AGAGGA	0.00014322
kmer_ATGAAG	0.000143102
kmer_GAAGAA	0.000143019
kmer_AACCG	0.000142997
kmer_GACGA	0.000142915
kmer_TGTAC	0.000142733
kmer_CCCTTC	0.000142686
kmer_CGGCTT	0.000142654
kmer_CGGAAC	0.000142587
kmer_CGGGTC	0.000142268
kmer_GTCGT	0.00014222
kmer_GTTCA	0.000142125
kmer_CGGGGT	0.000142022
kmer_TGAGCT	0.000141913
kmer_GCATA	0.000141793
kmer_AATGAG	0.000141726
kmer_CCAAGC	0.00014145
kmer_TCTCTC	0.000141252
kmer_TCTGGG	0.00014113
kmer_CCTTTC	0.000141109
kmer_GCGACG	0.000140919
kmer_CGGAT	0.000140885
kmer_CAACTT	0.000140804
kmer_TTTAT	0.000140766
kmer_GAAAAA	0.000140701
kmer_CTTAG	0.000140495
kmer_CCAGGT	0.000140476
kmer_CTCTA	0.000140432
kmer_GCTTCC	0.000140401
kmer_ACACA	0.000140388
kmer_TCCGT	0.000140339
kmer_GCCAGA	0.000140317
kmer_GGGTGC	0.000140312
kmer_AGATC	0.000140253
kmer_TCTCTT	0.000140239
kmer_CTCCGA	0.000140233
kmer_TAGGAG	0.000140188
kmer_CTATAA	0.000140115
kmer_CTAATT	0.000140041
kmer_GGTAG	0.000140021
kmer_TGACCA	0.000140018
kmer_GGTCGC	0.000139882
kmer_GCGCGT	0.000139869
kmer_CAAAT	0.000139683
kmer_CCTAG	0.000139529
kmer_ATAAA	0.00013952
kmer_CGTTC	0.000139519
kmer_GTGAT	0.000139468
kmer_ACGAC	0.000139326
kmer_TTATT	0.000139303
kmer_GGCAGA	0.000139232
kmer_CCTGAT	0.000139217
kmer_TGCCAC	0.000139194
kmer_AGTAG	0.000139143
kmer_TCAGT	0.000138982
kmer_ACAAC	0.000138824
kmer_CCTTCG	0.000138786
kmer_GTCAC	0.000138664
kmer_AGAGCG	0.000138596
kmer_CTAGGC	0.00013847
kmer_TGCAC	0.000138442
kmer_ACAAT	0.000138389
kmer_GCCCAC	0.000138294
kmer_AAGGGC	0.000138238
kmer_TAGGAA	0.000138229
kmer_CAACA	0.00013804
kmer_ACCGCG	0.000137866
kmer_GGTCCG	0.000137848
kmer_GTTGCG	0.000137791
kmer_CCAGAG	0.000137788
kmer_TATATG	0.000137698
kmer_GAGGTT	0.000137685
kmer_CGCTGG	0.000137569
kmer_GACTGT	0.000137551
kmer_CTCACC	0.000137411
kmer_TAGTGT	0.000137386
kmer_TCTTCC	0.000137371
kmer_GGCGCA	0.000137371
kmer_CTATC	0.000137342
kmer_CTTCGG	0.000137319
kmer_TAGCG	0.000137204
kmer_GACGGT	0.000137202
kmer_GAAAGT	0.000137124
kmer_CGCGAG	0.000137113
kmer_GCTAG	0.000137061
kmer_ATTAC	0.000137004
kmer_AGGCTC	0.000136992
kmer_TGTGCC	0.000136963
kmer_CAACAG	0.000136956
kmer_GGAGAT	0.000136929
kmer_AAGAAC	0.000136869
kmer_GAGCTT	0.000136847
kmer_CATGTC	0.000136839
kmer_TCGCA	0.000136821
kmer_GTCCTC	0.000136638
kmer_TGCCGA	0.000136513
kmer_CTGATA	0.000136478
kmer_ACCGT	0.000136392
kmer_CCGTCC	0.000136324
kmer_CCTGTC	0.000136198
kmer_CCCAT	0.000136185
kmer_GCCGGA	0.000136123
kmer_CGGTGC	0.000136084
kmer_AGTCCT	0.000135963
kmer_TAGGCT	0.000135921
kmer_GGCCCT	0.000135809
kmer_AGCTA	0.000135723
kmer_GCGATG	0.00013571
kmer_CAGTGC	0.000135688
kmer_CCCTA	0.000135591
kmer_GCACGC	0.000135586
kmer_AAACC	0.000135584
kmer_GCTAA	0.00013555
kmer_CCCCCT	0.000135537
kmer_AACCA	0.000135529
kmer_ATGGCA	0.000135455
kmer_CTTGCC	0.000135427
kmer_TCTATA	0.000135302
kmer_GGGGTT	0.000135255
kmer_CTAGAG	0.000135255
kmer_TGGGGA	0.000135149
kmer_GGTATC	0.000135044
kmer_TGATCC	0.000134995
kmer_TGCAGG	0.000134957
kmer_CGCGTG	0.000134941
kmer_AGATT	0.000134838
kmer_CTTTGT	0.000134828
kmer_CTCTGA	0.000134803
kmer_CAGCAC	0.000134781
kmer_TATTT	0.000134705
kmer_ACGATG	0.000134614
kmer_TTACC	0.000134584
kmer_CAAGCC	0.000134549
kmer_GCTTGC	0.000134517
kmer_CTCTGT	0.000134422
kmer_CGCCAC	0.000134365
kmer_TTTTTA	0.000134272
kmer_TTACT	0.00013426
kmer_ACGCT	0.000134236
[truncated: 3,496 more rows]

## Sheet: Muscle
Feature	Importance
kmer_GTA	0.00516613
kmer_GTT	0.0049936
kmer_CCA	0.00470635
kmer_CA	0.00466687
kmer_CGT	0.00433829
CGratio	0.00381341
kmer_CAGC	0.00373242
kmer_GT	0.00343691
kmer_GGTA	0.00315817
kmer_CCAC	0.00297081
kmer_CGTT	0.00297057
kmer_GCA	0.00294746
kmer_CAC	0.00285194
kmer_CCCTC	0.00277753
kmer_GCCGT	0.00276114
kmer_ACCA	0.00274641
kmer_TTTCG	0.00273919
kmer_ACC	0.00265267
kmer_AC	0.0026052
kmer_CACA	0.00257521
kmer_GTTT	0.00255806
kmer_CTC	0.00243031
kmer_TTG	0.00237965
kmer_TCACAC	0.00226924
kmer_CTCAA	0.00225698
kmer_TTT	0.00219655
kmer_TTTCGG	0.00217832
kmer_TGGTAC	0.00215828
kmer_CT	0.00211756
kmer_ACCC	0.00207899
kmer_GAC	0.00207661
CGperc	0.00204361
kmer_C	0.00203823
kmer_CAG	0.00198749
kmer_CAGCC	0.00197587
kmer_GTGTGA	0.00195398
kmer_TGGT	0.00194967
kmer_TCACA	0.00194717
kmer_ATGGAC	0.00189791
kmer_CCGT	0.00188396
kmer_TCCAGT	0.00186745
kmer_TG	0.00185734
energy_5cap	0.0018515
kmer_TT	0.001849
kmer_CACACC	0.00184758
kmer_ACT	0.00184049
kmer_GTTCA	0.00181976
kmer_GGTGG	0.00181355
codon_V	0.00178842
kmer_CACACT	0.00177707
codon_T	0.00173143
kmer_GTAG	0.00171938
kmer_ACA	0.00170109
kmer_TTTC	0.00168122
kmer_GG	0.00167209
kmer_CC	0.00163945
kmer_TTTCTC	0.00163335
kmer_GGTAG	0.00161562
kmer_GCC	0.00160975
kmer_GTACC	0.00160388
kmer_GCTT	0.00159105
kmer_ACCCTC	0.00158135
kmer_CCGTT	0.00157695
kmer_GGTAC	0.00155562
kmer_GC	0.00155531
kmer_T	0.00155422
kmer_GTG	0.00154519
kmer_CAGT	0.0015446
kmer_A	0.00153944
kmer_GA	0.00152879
energy_Gquad_last50bp	0.00152166
kmer_CTCACA	0.0015206
kmer_AT	0.00149704
kmer_GGT	0.00148927
kmer_CCACCA	0.00148012
kmer_CTACC	0.00147454
kmer_CCCA	0.00146915
kmer_GGC	0.00146662
kmer_CGA	0.00146278
kmer_CTCC	0.00146242
kmer_AGG	0.00146232
kmer_AG	0.00145305
kmer_TGG	0.00145231
kmer_ATG	0.00144894
kmer_CCC	0.00144359
kmer_TCT	0.00143931
kmer_TGGC	0.00142576
kmer_CG	0.00140325
codon_G	0.00140319
codon_H	0.00139126
kmer_TGGGTG	0.00137881
kmer_GGAC	0.00137687
kmer_GATGTC	0.00137563
kmer_G	0.00137065
kmer_GCCTCA	0.00134413
kmer_TGGTA	0.00134211
kmer_GGTACC	0.00133232
energy_last30bp	0.0013264
kmer_TGCGGC	0.00132556
kmer_ATA	0.00132533
kmer_TCTG	0.00131884
kmer_TC	0.00131392
kmer_TCC	0.00130569
energy_whole	0.00130183
kmer_CCAG	0.00129
kmer_TTCACA	0.00128139
kmer_ATATAT	0.00127912
kmer_CTT	0.00127439
kmer_GTC	0.00127182
kmer_GCCTC	0.00126734
kmer_GCT	0.00126172
kmer_CAT	0.00125689
kmer_AGCC	0.00125551
kmer_TGA	0.00125292
kmer_AGT	0.00125231
kmer_CAAG	0.00125172
kmer_GAGC	0.00125136
kmer_GAGG	0.00124977
kmer_TCG	0.001249
kmer_AGGA	0.00124853
kmer_TCAG	0.00124781
kmer_TCAC	0.00124157
kmer_TCTTCT	0.00123861
kmer_GGAGG	0.00123738
kmer_AGA	0.00123196
kmer_GTCCAA	0.00123187
kmer_GATGGT	0.00122911
kmer_GAA	0.00122151
kmer_TTCG	0.00121024
kmer_CACCA	0.00120814
kmer_GCCCC	0.00119411
kmer_TA	0.0011912
kmer_GCCT	0.00118807
kmer_AGC	0.00118694
kmer_GGCC	0.00118498
kmer_CGG	0.00118447
ATratio	0.00118184
kmer_TGT	0.00117393
kmer_GGCT	0.0011732
kmer_CCG	0.00117046
kmer_CAGG	0.00117014
kmer_AA	0.00116682
kmer_TGC	0.00116439
codon_R	0.00114934
kmer_TCAGC	0.00114837
kmer_GAG	0.00114793
kmer_ACTC	0.00113433
kmer_TTTT	0.0011333
kmer_TGTCA	0.0011321
energy_Gquad_5utr	0.00113168
kmer_CTG	0.00112972
kmer_AGAC	0.00112947
kmer_CCTC	0.00112828
kmer_GCTCAG	0.00112656
kmer_ATCC	0.00112432
kmer_GCCC	0.00112374
kmer_CGAG	0.00112163
codon_A	0.00111826
kmer_GCGG	0.00111625
kmer_CACC	0.00111529
kmer_TTC	0.00111367
kmer_TGCA	0.00110325
kmer_GAT	0.00108889
kmer_TGCT	0.00108788
kmer_AAATA	0.00108408
kmer_AGTCTC	0.00107779
kmer_CGCCG	0.00107734
kmer_ACAGC	0.00107326
kmer_GGA	0.00107301
kmer_GCTG	0.00106899
kmer_TTTCA	0.00106723
kmer_TCTC	0.00106686
kmer_CTAAT	0.00106644
kmer_TGGCTT	0.00106639
kmer_GGG	0.0010663
kmer_CTCA	0.00105096
codon_K	0.00105073
kmer_TAAGGG	0.00104979
kmer_CAAGAC	0.00103628
kmer_TACAG	0.0010327
kmer_CCCCA	0.00102681
codon_P	0.00102572
kmer_ACAC	0.00102571
kmer_GGTT	0.00102388
kmer_GTGG	0.00102359
kmer_GTGGCA	0.0010204
kmer_CATGGA	0.00101968
kmer_TCA	0.00101926
kmer_ATT	0.00101025
kmer_GCTC	0.00100849
kmer_CCCCAG	0.000997107
codon_S	0.000996311
kmer_GGAG	0.000995028
kmer_GCG	0.000990503
kmer_TCGC	0.000987381
kmer_AAT	0.000985454
kmer_GCAG	0.000983293
kmer_GCCA	0.000982834
kmer_AAGACT	0.000975911
kmer_TGGCAG	0.000973101
kmer_ATATA	0.000972655
kmer_CCT	0.00096744
kmer_TAG	0.00096227
kmer_GGCA	0.000961961
kmer_GACC	0.000961595
kmer_CTCT	0.00096145
kmer_AAA	0.000960694
kmer_AAG	0.000960254
kmer_GGGA	0.000954981
kmer_CTGC	0.000954101
kmer_TGTC	0.000953929
kmer_AGACT	0.000952128
codon_L	0.000951691
kmer_ACACC	0.000950869
kmer_CTGCGG	0.000942451
codon_E	0.000940838
kmer_CCAT	0.000939523
kmer_TATCCG	0.000939207
uORF	0.000938234
kmer_TTCTCT	0.000930924
kmer_ACACAC	0.000930764
kmer_GCGGC	0.000929707
kmer_CAGCG	0.000928848
kmer_TGCGG	0.000923108
kmer_ACCAG	0.000919901
kmer_TAA	0.000918517
kmer_CAGA	0.00091544
kmer_CTAA	0.000913384
kmer_CTGG	0.00091011
kmer_GTTC	0.000908407
kmer_GGGC	0.000906649
kmer_CCCTCT	0.000903637
kmer_GAGGA	0.000901343
kmer_CGGG	0.000900992
kmer_CCCCTC	0.000898379
kmer_TGCC	0.000896003
kmer_TGCTG	0.000895408
energy_Gquad_5cap	0.000895354
kmer_GGTG	0.00089361
kmer_AAGG	0.000892636
kmer_AGTT	0.000886729
kmer_ACG	0.000878293
kmer_TGGGAC	0.000876646
kmer_GCTAT	0.000874648
kmer_TGGG	0.000873192
kmer_GGAA	0.00086706
kmer_CTGGGT	0.000866509
kmer_ACAG	0.000866301
kmer_CCGG	0.000862752
kmer_TAT	0.0008623
kmer_CGTTCA	0.00085904
kmer_CTTT	0.000858724
kmer_CGCCGT	0.000855543
kmer_TGAG	0.000850186
kmer_GGGT	0.000850084
kmer_AGCA	0.000849277
kmer_AGCG	0.000846648
kmer_GCGA	0.000844486
kmer_AGCT	0.000842428
kmer_GTAC	0.000840309
kmer_CCCT	0.00083857
kmer_CCGTG	0.000836176
kmer_GGCTT	0.000835227
kmer_CATG	0.00083518
kmer_GTCT	0.000832378
kmer_AATA	0.000831947
kmer_GCTCA	0.000830646
kmer_AAAG	0.000829729
kmer_GCAA	0.000825657
kmer_GACA	0.000824572
kmer_CTGT	0.000823927
kmer_TTCCGT	0.000822551
kmer_TCGT	0.000822353
kmer_AAC	0.000822146
kmer_CATC	0.000818453
kmer_AGAG	0.000817275
kmer_TCTT	0.000814642
kmer_TCGCC	0.000812789
kmer_TTCC	0.000812032
kmer_CCCC	0.000811874
kmer_CCGGA	0.000810879
kmer_CTTC	0.000810152
kmer_GGCCT	0.000806738
utrlen_m80	0.000805797
kmer_TGGTG	0.000805731
kmer_ATC	0.000803305
kmer_AGGC	0.000803019
kmer_CGGA	0.000802018
kmer_GCGCTG	0.00080017
kmer_CCGC	0.000798807
kmer_ACCCAG	0.000798693
kmer_GAAA	0.000796829
kmer_TGAGC	0.000796237
kmer_CCATCA	0.000796139
codon_I	0.000796116
kmer_CAA	0.000795041
kmer_GTTGGC	0.000794946
codon_C	0.000790645
kmer_GACT	0.000790424
kmer_CAGCA	0.000790097
kmer_GAAC	0.000788598
kmer_TCGCCG	0.000787353
kmer_TAGA	0.000786262
kmer_CCGCT	0.000785254
kmer_TGTCAC	0.000784974
kmer_CCCCT	0.000783842
kmer_CGGC	0.000783196
kmer_CTTG	0.000782651
kmer_GCCCCG	0.00078178
kmer_CACT	0.000776046
codon_W	0.00077451
kmer_TTTCT	0.000772664
codon_*	0.000769806
kmer_TCCT	0.000768725
kmer_GTGGC	0.000768442
kmer_CACAC	0.000765729
kmer_ACACA	0.000762019
kmer_TTGC	0.000760121
kmer_CCGGAC	0.000758085
kmer_CAAGA	0.000757217
kmer_CCTG	0.000757062
kmer_TTTCAG	0.000756644
kmer_GGCG	0.000756344
kmer_TTCTT	0.000753822
kmer_TCCC	0.000752672
codon_F	0.00074922
kmer_CAAA	0.000749022
kmer_TGGA	0.000740311
kmer_AGCATC	0.000739409
codon_M	0.000737201
kmer_CTCAG	0.000736753
kmer_GGCAG	0.000731976
kmer_ATGG	0.000731648
kmer_AATG	0.000730996
kmer_CTA	0.000730749
kmer_CCAGC	0.000728652
kmer_TCCG	0.000728236
kmer_GCAGC	0.000728156
kmer_TTTCTT	0.000727463
kmer_CTGCA	0.000726771
codon_Q	0.000726765
kmer_GGTGGC	0.000726364
kmer_CTCTT	0.000725112
kmer_TTTG	0.000723679
kmer_GAGA	0.00071988
kmer_CGC	0.000719839
kmer_AGTC	0.000714594
kmer_GCCG	0.000712603
kmer_CTCG	0.000710799
kmer_CCTGC	0.00070994
kmer_ACCAC	0.000704688
codon_D	0.000702513
kmer_AGAA	0.000700018
kmer_AGAT	0.000698865
kmer_CGCC	0.000697855
kmer_ACTAAT	0.000697034
kmer_AGGAG	0.000694784
kmer_GCCAG	0.000693866
kmer_CTGGT	0.000692912
kmer_CGGAGC	0.00069221
kmer_GCGCT	0.000689683
kmer_TCCA	0.000688639
kmer_GCTGG	0.000687593
kmer_AGGG	0.000683375
kmer_CTCGC	0.000683136
kmer_CTCGT	0.0006826
kmer_CCCG	0.000681899
kmer_GACCCT	0.00068142
kmer_GCCGTC	0.000680485
kmer_TTGA	0.000679745
kmer_GAAG	0.00067614
kmer_ACTG	0.000674668
kmer_CGCT	0.000674481
kmer_GGTAGG	0.000673437
kmer_TCCAC	0.000671474
kmer_TCTGC	0.000669498
kmer_GATG	0.000666372
kmer_GTCA	0.000665185
kmer_TAGGAA	0.000665019
kmer_AGGT	0.000663671
kmer_TGTCCA	0.000663635
kmer_GGAGC	0.000663372
kmer_TGCG	0.000663041
kmer_TAC	0.000662881
kmer_GTCC	0.000660666
kmer_TCAT	0.000660151
kmer_ACGA	0.000660066
kmer_AAGA	0.000659148
kmer_CTGA	0.000658866
kmer_CCCAG	0.00065675
uAUG	0.000655061
kmer_GAGGC	0.000654162
kmer_TTCT	0.000650391
kmer_CTGAGC	0.000648225
kmer_CCTT	0.000647281
kmer_TTGG	0.000645043
kmer_AAAAG	0.000644308
kmer_CGAGCC	0.000641385
kmer_TGAA	0.000641035
kmer_AAAGG	0.000640827
kmer_TGAC	0.000640763
kmer_CTCGCC	0.000640581
kmer_CTCCG	0.000640433
kmer_AACTGA	0.000640132
kmer_ATTC	0.000639488
kmer_CAAAT	0.000638904
kmer_GACCA	0.000634555
kmer_GGGG	0.000634386
kmer_AATATA	0.00063246
kmer_CGTG	0.000631234
kmer_CTCTC	0.000631171
kmer_TCGTT	0.000628509
kmer_GAGT	0.000626685
kmer_GGGCA	0.000626641
kmer_CCAGG	0.000626504
kmer_TGAGG	0.000626094
kmer_GTTTC	0.000626022
kmer_GTCCGA	0.000625258
kmer_AACA	0.000623619
kmer_TTA	0.000621212
kmer_AGAGC	0.000619632
kmer_TGTG	0.000616558
kmer_CACTC	0.000616279
kmer_TCCGC	0.000614729
kmer_CGTGTG	0.000614527
kmer_CGGT	0.000613583
kmer_CGGTGG	0.000611337
kmer_CCCCC	0.000611195
kmer_GGGCT	0.000608703
kmer_GTCG	0.000606531
kmer_AGTTT	0.00060566
kmer_CAGGA	0.000603839
kmer_CGGAG	0.000603441
kmer_GCATC	0.000601914
kmer_GCGC	0.00060136
kmer_CCTCTT	0.000600954
kmer_GTGA	0.000600555
kmer_GTTTT	0.000596197
kmer_GACG	0.000595959
kmer_CGTTC	0.000595074
kmer_GGACC	0.000594505
kmer_GCCATC	0.000593395
kmer_TCGG	0.000593387
kmer_CTGGG	0.000592548
codon_N	0.000591443
kmer_CATCC	0.000589155
kmer_CAAAAG	0.00058868
kmer_AAGAC	0.000587111
kmer_CGTC	0.000586159
kmer_TTTCAC	0.000585961
kmer_CCTCG	0.000584948
kmer_CGCG	0.000582767
kmer_GACCGC	0.000582152
kmer_CCTCT	0.000581743
kmer_GGTC	0.000581554
kmer_AGGAGG	0.000580463
kmer_GCTGAG	0.000580251
kmer_ATGT	0.000580099
kmer_GAGCC	0.000579304
kmer_GGGAG	0.000577487
kmer_TCGTCG	0.000576139
kmer_ACCCA	0.000574837
kmer_GGATG	0.000574449
kmer_CTGAG	0.000573986
kmer_AAAGA	0.000573505
kmer_TTCTC	0.00057299
kmer_AAGAT	0.000572249
kmer_AAAA	0.00057163
kmer_CGCTGA	0.000570209
kmer_GCTGA	0.000567905
kmer_GGCGC	0.000567448
kmer_CCAGCC	0.000563202
kmer_CCTGG	0.000562677
kmer_TGGGT	0.000560926
kmer_GCTGC	0.000560856
kmer_GCCCAA	0.000560521
kmer_CCAA	0.000558611
kmer_AGCAA	0.000554307
kmer_AGAGG	0.000553833
kmer_GCCACC	0.00055362
kmer_CTCAC	0.000552644
kmer_GGCCCC	0.000551675
kmer_CCCGGA	0.00055019
kmer_ACCG	0.00054864
kmer_CCGCC	0.000545735
kmer_ATGC	0.000545696
kmer_CCCCCC	0.000545625
kmer_CATGT	0.000544109
kmer_GTGC	0.000543739
kmer_CAGTC	0.000542478
kmer_CTGTC	0.000541638
kmer_CCTCA	0.000540853
kmer_GAGGCA	0.000539653
kmer_AGCTG	0.00053931
kmer_ACAT	0.000538447
kmer_GCGGT	0.000538128
kmer_TCCGGA	0.000536529
kmer_GAACAA	0.000536127
kmer_CCTA	0.000535265
kmer_GAAT	0.000534383
kmer_TTTCC	0.000532754
kmer_AAAGGT	0.00053192
kmer_CTGCG	0.000530163
kmer_CCCGG	0.000529905
kmer_GGCGG	0.00052805
kmer_GCTA	0.000527764
kmer_GACCC	0.000526861
kmer_CAGCCC	0.000524483
kmer_TTCA	0.000523541
kmer_ACGGAG	0.000522712
kmer_GGCCGT	0.000522503
kmer_TGCAG	0.000522136
kmer_TAAG	0.000521525
kmer_TCTTT	0.000521265
kmer_CGAC	0.000520924
kmer_AAAC	0.000520065
kmer_AGTG	0.000519984
kmer_ATAA	0.000518187
kmer_CCTCTC	0.000518122
kmer_CGCA	0.000515942
kmer_AACC	0.000515441
kmer_GTAA	0.000511751
kmer_CTAGGA	0.000510783
kmer_ACCAT	0.000510761
kmer_ATGA	0.000510647
kmer_AAGT	0.000509334
kmer_TGTCG	0.000509316
kmer_AAGTG	0.000509069
kmer_GAAGG	0.000508783
kmer_TCAA	0.000503469
kmer_GGTCTC	0.000502169
kmer_ACGC	0.00050212
kmer_CGGCGG	0.000501842
kmer_CACCAT	0.000499043
kmer_TGGCT	0.000498489
kmer_TAGCC	0.000498161
kmer_ACTGG	0.000497998
kmer_GGGCAG	0.00049695
kmer_ACACTC	0.000496827
kmer_TCTGGG	0.000495078
kmer_TCCTC	0.000494453
kmer_ATGTCG	0.000494384
kmer_GCAC	0.000492724
kmer_AGACC	0.000492364
kmer_GGCCC	0.000491615
kmer_CAGGC	0.000490837
kmer_GCTCC	0.000490731
kmer_AGCCC	0.000490282
kmer_TCTCT	0.000490003
kmer_ATTTT	0.000488713
kmer_CCCAA	0.000488693
kmer_GAACA	0.000486077
kmer_CTTTA	0.000484617
kmer_GCCGC	0.0004844
kmer_ATTTC	0.000484314
kmer_AGTA	0.000483761
kmer_CGAGC	0.000478873
kmer_CCGA	0.000476211
kmer_GCGGCG	0.000475851
kmer_CCTCGT	0.000475268
kmer_GCCTG	0.000474521
kmer_GGCTC	0.000472475
kmer_AAGGG	0.000471987
kmer_CATT	0.000470982
kmer_ACCCC	0.000470875
kmer_CGCCCC	0.000468863
kmer_TATAA	0.000468768
kmer_AGGAA	0.000468132
kmer_GGAAAC	0.00046807
kmer_GCTTC	0.000468045
kmer_TAGGA	0.000467893
kmer_CTAG	0.000467579
kmer_GTTGGG	0.000467549
kmer_GTTG	0.000467398
kmer_GACTCT	0.000467018
kmer_TGGGG	0.000464767
kmer_GGGGAG	0.000463656
kmer_GGCCTA	0.00046335
kmer_GAGACG	0.000462888
kmer_TGTGA	0.000462327
kmer_GGACA	0.000460128
kmer_TAAGG	0.000459993
kmer_TGTA	0.000459268
kmer_GCGCC	0.000458859
kmer_GGCTG	0.000458841
kmer_TCGTTA	0.000457134
kmer_GGTTGG	0.000456379
kmer_GACTC	0.000455759
kmer_CTCAGC	0.000455428
kmer_AGGCA	0.000453604
kmer_CCGCG	0.000453582
kmer_GGAT	0.000453332
kmer_CTCCC	0.000452585
kmer_CACG	0.000452121
kmer_CCGGGC	0.00045209
kmer_GATC	0.000451571
kmer_CCCTCA	0.000451003
kmer_TAAA	0.000450957
kmer_ATTT	0.000450739
kmer_GCGT	0.00045036
kmer_GCCCT	0.000449726
kmer_GGGCC	0.000449315
kmer_ACAA	0.000448491
kmer_AAGAA	0.000446074
kmer_GGGCG	0.000445384
kmer_GCCCG	0.000445218
kmer_TCGCT	0.0004452
kmer_CGAGCG	0.000445088
kmer_GTGTG	0.0004446
kmer_GTGT	0.000444238
kmer_GCGGCC	0.000443985
kmer_GCCGG	0.00044398
kmer_AAGAG	0.00044393
kmer_CGGCG	0.000443884
kmer_TTTTC	0.000443203
kmer_AGGTAG	0.00043953
kmer_AGCTC	0.000439167
kmer_ATGCT	0.000438351
kmer_TACAGA	0.000436794
kmer_GCGGG	0.000436718
kmer_GTAGCT	0.000436548
kmer_GAGGG	0.000435477
kmer_GGAGGC	0.000433597
kmer_GCCTGC	0.000431258
kmer_GCAGG	0.000430807
kmer_CCACC	0.000430743
kmer_ATGTCC	0.00042949
kmer_GGCCG	0.00042889
kmer_GGGGC	0.000428817
kmer_CTTCT	0.000428199
kmer_GAGCA	0.000427546
kmer_TATA	0.000426477
kmer_TGTAA	0.0004263
kmer_AGCTAT	0.000426104
kmer_TCTCG	0.000425591
kmer_CAAC	0.000425503
kmer_AGCGG	0.000424232
kmer_GAGCT	0.000424153
kmer_AATCC	0.000423278
kmer_TTGT	0.00042248
kmer_GAACTT	0.000421309
kmer_AGCCT	0.00042129
kmer_TGTT	0.000421127
kmer_CAGAG	0.000420411
kmer_CAGCAA	0.000420048
kmer_GGAGAG	0.000419481
kmer_GGTTG	0.000418704
kmer_CGCTG	0.000418489
kmer_GGGGCC	0.000417061
kmer_CCTTT	0.000416498
kmer_GGGGA	0.00041627
codon_Y	0.000416203
kmer_GGAAA	0.000416192
kmer_GGCTCA	0.000416155
kmer_GCTGT	0.000415394
kmer_GGTCC	0.000415245
kmer_CGACT	0.000414796
kmer_TCGTC	0.000414516
kmer_GCCTCG	0.000413254
kmer_ATCT	0.000413205
kmer_CGACC	0.000413144
kmer_ATGTC	0.00041272
kmer_AAAT	0.000411788
kmer_CTGCAG	0.000411747
kmer_TGCAGC	0.000411347
kmer_CGGCC	0.000410348
kmer_CACCC	0.000410232
kmer_GATT	0.000409669
kmer_CCTGCC	0.00040958
kmer_ATACAG	0.000409339
kmer_ACCT	0.000408742
kmer_CCGAG	0.000408401
kmer_GGCGAG	0.000407335
kmer_CAGCT	0.000406103
kmer_CAAATA	0.000406041
kmer_CTAC	0.000405005
kmer_AATC	0.000402836
kmer_GGCCTG	0.000402827
kmer_TCAGAC	0.00040197
kmer_CGCCC	0.000399507
kmer_AGCGC	0.000398991
kmer_TGAAGA	0.000398883
kmer_CACAG	0.000397784
kmer_GAGGAG	0.000397647
kmer_CTCCT	0.000397372
kmer_CTAAG	0.00039719
kmer_CAAAG	0.000396332
kmer_GTCGC	0.000395842
kmer_ACTGC	0.000395018
kmer_TCCTG	0.000393959
kmer_CCTTTT	0.000393727
kmer_GGTGAA	0.000393177
kmer_AGACAC	0.000392353
kmer_TAGATG	0.000391505
kmer_ATATAC	0.00039048
kmer_TTCCC	0.000390476
kmer_GGGCTC	0.000388265
kmer_GACAGC	0.000388001
kmer_TGCCT	0.000386511
kmer_AAGC	0.000385834
kmer_TGGAC	0.000385718
kmer_ATGGC	0.000385447
kmer_TCTCAC	0.000385375
kmer_GGAAG	0.00038514
kmer_GCAGCA	0.000384913
kmer_GCCCA	0.000382444
kmer_CTTCC	0.000381317
kmer_TGACTG	0.000381314
kmer_AGCAG	0.00038058
kmer_GCAAA	0.000380214
kmer_AAATCT	0.000380117
kmer_TCGACC	0.000379842
kmer_TTGGGC	0.000379236
kmer_GTTGG	0.000378511
kmer_CTCTG	0.000378503
kmer_TATG	0.000377501
kmer_AGTCAC	0.000376145
kmer_GAGAA	0.000376145
kmer_GAGAC	0.00037554
kmer_GCCCGG	0.000373213
kmer_CTAGAT	0.000371077
kmer_CACTG	0.000370756
kmer_AGCTCT	0.000370556
kmer_CTGGC	0.000370484
kmer_CCCCTT	0.000370328
kmer_GACCG	0.000369493
kmer_CCCAGG	0.000369361
kmer_AGAAG	0.000369344
kmer_CCTGGC	0.000369094
kmer_GCGCCG	0.000368634
kmer_AACT	0.000367726
kmer_TAGG	0.000367619
kmer_CCGCCG	0.000367537
kmer_GCTTA	0.000367256
kmer_AGCTT	0.000367109
kmer_GTAGA	0.000366843
kmer_CCATGG	0.000366829
kmer_TTGGC	0.000366806
kmer_GAAGAG	0.000365985
kmer_CCCTG	0.000365938
kmer_CCGGC	0.000365641
kmer_GGTCCT	0.000364468
kmer_TATCC	0.000364238
kmer_GTCGCT	0.000364106
kmer_ATAT	0.000363701
kmer_AAGGA	0.000363289
kmer_GGTCT	0.000362995
kmer_TGGGC	0.000362244
kmer_TGGACG	0.000362129
kmer_GGAGA	0.000361672
kmer_AGGCC	0.000361581
kmer_GCCAT	0.000361145
kmer_CTAT	0.000360908
kmer_CTCAAG	0.000360366
kmer_CTTGGC	0.000360327
kmer_AGCAAG	0.000360269
kmer_TTGGG	0.00036015
kmer_TATT	0.000359609
kmer_TCCAG	0.000359281
kmer_TAGC	0.000358867
kmer_ACTTTT	0.000357994
kmer_AGGGAC	0.00035727
kmer_TATTT	0.000356677
kmer_GCAGCG	0.000356313
kmer_CTGCT	0.000356145
kmer_GCAT	0.000355766
kmer_CGGAC	0.000355623
kmer_TGGGA	0.000355378
kmer_TCCTT	0.000355339
kmer_TGCCC	0.000354966
kmer_CGCCGC	0.00035474
kmer_ACTCT	0.000354218
kmer_CCCGC	0.000354024
kmer_CCGCCA	0.000353929
kmer_CGGGC	0.000353019
kmer_AACGG	0.000352813
kmer_CCCTGC	0.000351684
kmer_AGCCG	0.000351565
kmer_TCTTC	0.000351523
kmer_CTGCC	0.000350458
kmer_CCCAC	0.000349751
kmer_CAAGG	0.000349731
kmer_CACACA	0.000348286
kmer_TGAATG	0.000347932
kmer_ACTCC	0.000347705
kmer_CACTCC	0.000347604
kmer_GGCGGC	0.000347367
kmer_TGAAG	0.00034735
kmer_ACACT	0.00034707
kmer_GCTGGC	0.00034659
kmer_CTAGA	0.00034641
kmer_AGGTG	0.000346295
kmer_TGGCC	0.000345706
kmer_GTGGG	0.000345077
kmer_GCAGT	0.000345075
kmer_CCCAGC	0.000344303
kmer_AATAT	0.000344106
kmer_CGAGGA	0.000344095
kmer_CCTCC	0.000343849
kmer_CATGTC	0.000343709
kmer_GCCAGG	0.000343513
kmer_CGCGG	0.000342572
kmer_CCCAT	0.000342461
kmer_CCACAT	0.000342136
kmer_AGACCA	0.000341837
kmer_CAGGT	0.000341772
kmer_TCTCC	0.000341521
kmer_CGTGT	0.000340848
kmer_ACCCT	0.000339719
kmer_AGGCG	0.000339628
kmer_CGTA	0.000339604
kmer_ATCA	0.000338997
kmer_GACAC	0.000338585
kmer_ATGCC	0.000338426
kmer_TGCTC	0.000338426
kmer_CTCCGC	0.000338236
kmer_GCTCT	0.00033792
kmer_TTTA	0.000337035
kmer_ATCCT	0.000336893
kmer_CTGAC	0.000336745
kmer_ACCCCT	0.00033616
kmer_ACAGCC	0.000335608
kmer_CAGTT	0.000335414
kmer_GCTGGT	0.000335413
kmer_TGGCGC	0.000334974
kmer_TGGAG	0.000334879
kmer_CACCCA	0.000334779
kmer_ACGT	0.000334714
kmer_CAGCGG	0.000334433
kmer_ACATA	0.000334399
kmer_CACAT	0.00033395
kmer_GATTCA	0.000333703
kmer_CGTCC	0.000333627
kmer_AGGAC	0.000333588
kmer_CTGGTG	0.000332867
kmer_CGGGT	0.00033282
kmer_ATCAGC	0.000332489
kmer_TAGAG	0.000332305
kmer_CTCTCC	0.000331754
kmer_GTCCGG	0.000331335
kmer_CTTTC	0.000329718
kmer_TTCCG	0.000329571
kmer_CCTCGC	0.000329252
kmer_TCCCA	0.000328645
kmer_GAGCAG	0.000327897
kmer_GGGAA	0.000326881
kmer_CGGTG	0.000326344
kmer_TGAT	0.000325686
kmer_CGCCA	0.000324211
kmer_CGGGG	0.00032411
kmer_TATC	0.000324108
kmer_AGAAA	0.000323437
kmer_TCAGTC	0.000323316
kmer_ATGGT	0.000323221
kmer_CCAGT	0.000323139
kmer_CCGGCC	0.000322866
kmer_CAGGG	0.000322808
kmer_TCCCCA	0.000321699
kmer_CCAGA	0.000321696
kmer_AGATG	0.00032148
kmer_GAATG	0.000321236
kmer_TGGCA	0.000321181
kmer_AAGGGA	0.000320581
kmer_CTGAA	0.000320537
kmer_TACC	0.000320531
kmer_GCGAG	0.00032046
kmer_GGCAGC	0.000320132
kmer_AGCCCC	0.000319201
kmer_CAAT	0.00031916
kmer_CGCTC	0.000318936
kmer_CTGGGG	0.000318897
kmer_ATCGT	0.000318719
kmer_TATATA	0.000318352
kmer_CGTCCC	0.000317582
kmer_CCCACC	0.000316649
kmer_AGAGGA	0.000316513
kmer_GCCGCC	0.00031603
kmer_CAGAA	0.000315714
kmer_TCCCC	0.000315193
kmer_GGCGA	0.000315047
kmer_CATAGA	0.000314998
kmer_CCCTTT	0.000314792
kmer_TGGCGG	0.000314672
kmer_GCCAC	0.000314425
kmer_TGGGGC	0.000313253
kmer_ATTA	0.000312885
kmer_GTTGT	0.00031231
kmer_CGGACA	0.000312094
kmer_CCGCGC	0.000312073
kmer_GCAAAG	0.000311425
kmer_ATGGA	0.000311384
kmer_AGCCTC	0.00031072
kmer_ACGG	0.000309518
kmer_TTCAC	0.00030898
kmer_CCACA	0.000308943
kmer_CTCAAA	0.000308917
kmer_TCTCTA	0.000308786
kmer_AGCCAG	0.000308785
kmer_TTTTGT	0.0003082
kmer_CGGCCC	0.00030745
kmer_TACA	0.000306558
kmer_GCTTT	0.000306215
kmer_GCAGA	0.000305609
kmer_GTTA	0.000304882
kmer_ATATG	0.00030448
kmer_ACCAGC	0.000304209
kmer_AGATT	0.000303895
kmer_GGTGC	0.000303655
kmer_GTCCT	0.000303377
kmer_GACTT	0.000302534
kmer_GCGGAG	0.000301133
kmer_TTTTTT	0.000300884
kmer_GAAGT	0.000300013
kmer_ATTCTT	0.000299022
kmer_GAAGAT	0.000298897
kmer_AAATC	0.000298735
kmer_GTCTC	0.000298676
kmer_GAGAG	0.000297457
kmer_CTGAAG	0.000297113
kmer_GACACC	0.000296549
kmer_CATCTC	0.000296481
kmer_GGCGCC	0.000295777
kmer_AGCAGC	0.000295109
kmer_AGGGG	0.000294833
kmer_ACTT	0.000294593
kmer_GAAAG	0.000293213
kmer_CGAA	0.000293145
kmer_GTGAGC	0.0002929
kmer_ATTCT	0.000292698
kmer_GCGGA	0.000292401
kmer_TCTGCA	0.000292193
kmer_CCAAA	0.000291984
kmer_CCCTT	0.000291479
kmer_TAGT	0.000291449
kmer_CGTCCG	0.000290705
kmer_CAGCAG	0.000290258
kmer_GGCCCA	0.00029005
kmer_TTAC	0.00028914
kmer_CTTCCC	0.000288799
kmer_CACCTA	0.000287897
kmer_GAGACC	0.000287765
kmer_CTTGG	0.000287659
kmer_GGGGGC	0.000287121
kmer_TCCGT	0.000286977
kmer_AATCA	0.000286966
kmer_GTCAC	0.000286658
kmer_CTCCA	0.000286585
kmer_GTGAAA	0.0002863
kmer_GTAGG	0.000286001
kmer_GGAAT	0.000285405
kmer_TCTCTG	0.000285267
kmer_GGAGCC	0.000284862
kmer_GTGGT	0.000284106
kmer_AAGCT	0.00028341
kmer_TTCAT	0.000283283
kmer_GGCTTT	0.00028303
kmer_CAGTCC	0.000282577
kmer_AGGACC	0.00028158
kmer_ATCCTC	0.000281533
kmer_AATGT	0.00028105
kmer_TTGCTG	0.00028078
kmer_CTTCTC	0.000280761
kmer_CCCCG	0.000280643
kmer_GGCCA	0.000280636
kmer_GTCACT	0.000280306
kmer_GCATCC	0.000280296
kmer_AGAAC	0.00027905
kmer_TGAAA	0.000278752
kmer_AGTGC	0.00027779
kmer_AGGTGG	0.000277426
kmer_CATGG	0.00027688
kmer_ATCG	0.000276726
kmer_GCCGTA	0.000276702
kmer_AACATC	0.000276272
kmer_TGCAA	0.000276022
kmer_TAAC	0.000275714
kmer_CTTTCT	0.000275706
kmer_TCGA	0.000275385
kmer_CGGCCT	0.000275299
kmer_AACGA	0.000275098
kmer_CCATG	0.000274947
kmer_TAAT	0.000274662
kmer_GTGGAG	0.000274652
kmer_CTGTA	0.000274401
kmer_CCAAGG	0.000274236
kmer_TCCACA	0.000274138
kmer_AACCA	0.000273758
kmer_TGTGG	0.000273735
kmer_GGACCC	0.000272669
kmer_ATTG	0.000272495
kmer_AAAAGA	0.000271816
kmer_AAGGC	0.000271402
kmer_ACGCC	0.000270393
kmer_TCCTCG	0.000270359
kmer_AGGGC	0.000269767
kmer_TCTA	0.000269488
kmer_CTGCTG	0.000269455
kmer_TGGCG	0.0002694
kmer_CGTCT	0.00026936
kmer_CGGGGT	0.000269306
kmer_ATTGA	0.00026905
kmer_AGGCCT	0.000269011
kmer_GAGAAC	0.0002688
kmer_AGGATG	0.000268462
kmer_CTTGC	0.000268279
kmer_TTCTG	0.000267722
kmer_TAATC	0.000267436
kmer_ATATT	0.000267063
kmer_GCCCTC	0.000266935
kmer_ATATTG	0.00026679
kmer_CTTTT	0.000265895
kmer_ACAAA	0.000265815
kmer_CTCGG	0.000265657
kmer_GACGA	0.000265219
kmer_GGGGT	0.000264893
kmer_GGCGGG	0.000264808
kmer_TCTGG	0.00026474
kmer_AGAGCT	0.000264565
kmer_CATGCT	0.000264415
kmer_TTTTCA	0.00026437
kmer_GCATA	0.000264089
kmer_TCTGTC	0.000263773
kmer_GGCCTC	0.000263623
kmer_GACGC	0.000263531
kmer_AGTGCC	0.000263338
kmer_TTTTT	0.00026332
kmer_TCGCTG	0.000263262
kmer_TAGTTT	0.000263156
kmer_GGTGA	0.000262959
kmer_CGTCG	0.000262899
kmer_TCGAG	0.000262111
kmer_CCTTC	0.000262016
kmer_GTAGC	0.000261995
kmer_CATGC	0.000261868
kmer_ATCCC	0.000261534
kmer_TAAGA	0.000261201
kmer_GTGCC	0.000261128
kmer_ATTCCT	0.000260889
kmer_GCTTG	0.000260715
kmer_AAAAGG	0.000260122
kmer_CGATG	0.000259801
kmer_AGACTG	0.000259641
kmer_TATTTC	0.000259438
kmer_TGGTGA	0.000258923
kmer_ATAGCC	0.000258725
kmer_CCACT	0.000258508
kmer_AGGGCC	0.000258185
kmer_CCGCCC	0.000258164
kmer_CGTGC	0.000258108
kmer_CTTA	0.000258064
kmer_TGTCT	0.000258002
kmer_GGAGGG	0.000257925
kmer_GGAGTC	0.000257831
kmer_CATTG	0.000257792
kmer_CAGCCT	0.000257749
kmer_GATGC	0.000257731
kmer_GCCTCT	0.00025766
kmer_CTGAGA	0.00025744
kmer_AAGATT	0.00025723
kmer_TATACA	0.000257072
kmer_GGGTC	0.000256466
kmer_CATGA	0.00025641
kmer_ACTA	0.00025627
kmer_AGTGG	0.000255445
kmer_ACGCCA	0.000255247
kmer_CTACCC	0.000255214
kmer_CCTGCG	0.000255146
kmer_AATGC	0.00025347
kmer_AGATGT	0.000253427
kmer_TTCCT	0.000253274
kmer_CTTCA	0.000253229
kmer_CACCCC	0.000252864
kmer_GGCTTG	0.000252769
kmer_CTCCAG	0.000252623
kmer_TACTC	0.000251751
kmer_AGTCC	0.000251662
kmer_CCGGT	0.000251622
kmer_GATGG	0.000251604
kmer_TGCTGG	0.000251358
kmer_CCAGGC	0.000250862
kmer_ACACCG	0.000250293
kmer_CTCTTT	0.000249713
kmer_CCACG	0.000249445
kmer_CGGGCT	0.000249106
kmer_GAGTC	0.000248735
kmer_CCGGG	0.00024864
kmer_CCCCCG	0.00024854
kmer_GGGGG	0.000248519
kmer_ATCTG	0.000248429
kmer_AGCCCA	0.000247906
kmer_GGTTT	0.000247381
kmer_CATA	0.000247369
kmer_GGAAC	0.000246952
kmer_CATTC	0.00024682
kmer_TTTGT	0.000246815
kmer_CGCGC	0.000246756
kmer_TAAAA	0.000246472
kmer_TGGAGC	0.000246055
kmer_CCATC	0.000245898
kmer_CGTCGC	0.000245743
kmer_AAAAT	0.000245648
kmer_TCATA	0.000245601
kmer_CTGGTA	0.000245564
kmer_CTCCCC	0.0002455
kmer_GAACT	0.000245256
kmer_GCAAG	0.000244928
kmer_CAGCTG	0.000244744
kmer_GCGCCC	0.000244739
kmer_GCTTCT	0.00024448
kmer_TACAGC	0.00024441
kmer_AGCAAA	0.000244409
kmer_TCAGCC	0.000244118
kmer_AATT	0.000243772
kmer_GCGTC	0.000243744
kmer_CTTTG	0.00024331
kmer_TGCCG	0.000243206
kmer_TCACT	0.000243181
kmer_GGGTG	0.000243175
kmer_CGAGTC	0.000242832
kmer_GCACC	0.000242766
kmer_TCAGG	0.000242521
kmer_GAAAA	0.00024245
kmer_CTTGCT	0.000242431
kmer_CCTGCA	0.000242164
kmer_ATTGG	0.000242043
kmer_GTTCTA	0.000241819
kmer_AGAGA	0.000241786
kmer_GGTTC	0.000241504
kmer_GCCGCG	0.000241379
kmer_CCTGAG	0.000240924
kmer_TAGTT	0.000240612
kmer_GCCCCA	0.000240456
kmer_AGACTC	0.000240363
kmer_CGCCT	0.000239829
kmer_GAAGA	0.000239749
kmer_TCTGA	0.000239643
kmer_GACAT	0.000239209
kmer_CCGAC	0.000239139
kmer_CTCTCG	0.000239066
kmer_AAATAC	0.000239026
kmer_TGGCTG	0.000238989
kmer_GCTGCG	0.000238855
kmer_GTCCG	0.000238732
kmer_CCTAA	0.00023822
kmer_TCCTCT	0.000238179
kmer_GTGAA	0.00023816
kmer_CGACTG	0.00023795
kmer_GCTGCA	0.000237918
kmer_AAAATA	0.000237794
kmer_GAGCCT	0.000237688
kmer_AACAAA	0.000237539
kmer_CAAGTC	0.000237398
kmer_TCCGA	0.000236815
kmer_TTTAA	0.000236785
kmer_CAAGTG	0.000236484
kmer_GCGCGG	0.000236191
kmer_ACAGCA	0.000236057
kmer_GCAAAC	0.000235695
kmer_TTTTG	0.000235595
kmer_CTGGCG	0.00023555
kmer_GTCCA	0.0002354
kmer_TTCTTT	0.00023533
kmer_CTATAA	0.000234925
kmer_TCATAA	0.000234861
kmer_ATAC	0.000234173
kmer_AATCT	0.0002338
kmer_ATTCA	0.000233685
kmer_AGCCA	0.00023366
kmer_CTTTGT	0.000233553
kmer_CGGGA	0.000233377
kmer_GGACAT	0.000233346
kmer_CATAA	0.00023319
kmer_CGCGGT	0.000232857
kmer_CCGCTC	0.000232841
kmer_GTGCT	0.000232666
kmer_CGAGA	0.000232525
kmer_CAGTG	0.000232517
kmer_TTAG	0.000232371
kmer_CTGCGC	0.000232281
kmer_ATCAG	0.00023227
kmer_GCTTCA	0.000231442
kmer_AGACGG	0.000231406
kmer_AAATCG	0.000231356
kmer_GGCTTC	0.00023128
kmer_CAGGCC	0.000231249
kmer_TGTGAT	0.000231125
kmer_TCCCT	0.000231113
kmer_TGGGTC	0.000231109
kmer_CTTTAA	0.00023104
kmer_GGGTT	0.000230896
kmer_TCCGAC	0.000230894
kmer_AGGCAG	0.000230605
kmer_AGCTGG	0.00023056
kmer_CTCTGC	0.000230014
kmer_ACATGA	0.000229998
kmer_ATGCA	0.000229839
kmer_GCCAA	0.00022975
kmer_GGGCCC	0.00022964
kmer_CTCGTC	0.00022953
kmer_CCGCTG	0.000229434
kmer_AACG	0.000229253
kmer_CCATTC	0.000229237
kmer_AAACTG	0.000228971
kmer_TTTTCC	0.000228039
kmer_AGACA	0.000227044
kmer_TCTCA	0.000226629
kmer_GACCCG	0.000226603
kmer_ACGAG	0.000226302
kmer_CTGGA	0.000226226
kmer_TGAGA	0.000226117
kmer_CTTCAC	0.000225913
kmer_AAGAGG	0.000225764
kmer_GCGTCT	0.000225496
kmer_GCTCCT	0.000225451
kmer_CCGGAG	0.000225277
kmer_GTAGGT	0.00022519
kmer_GACACA	0.000224943
kmer_GAGCG	0.000224873
kmer_CAACA	0.000224752
kmer_GGTGT	0.000224713
kmer_GACTG	0.000224655
kmer_GATCAC	0.000223762
kmer_CCCGGC	0.000223313
kmer_ATGGG	0.000223064
kmer_ACCGCC	0.000222875
kmer_AGGCT	0.000222681
kmer_CTAGG	0.00022242
kmer_TAAGAG	0.000221772
kmer_TCCGG	0.000221192
kmer_AGGAAA	0.000221166
kmer_CACTGG	0.000221034
kmer_TCGTG	0.00022095
kmer_AGAGCA	0.000220655
kmer_CGGAGG	0.000220431
kmer_TCAGT	0.000220132
kmer_CTGTCC	0.000219844
kmer_GGTTCT	0.000219701
kmer_GAGGT	0.000219564
kmer_GGGAGC	0.000219477
kmer_CCTGA	0.000219145
kmer_ATGCCA	0.00021914
kmer_GGGATT	0.000218899
kmer_TCAAG	0.000218863
kmer_GAACAG	0.000218837
kmer_TCTAA	0.000218716
kmer_GTCGG	0.000218694
kmer_GGACGC	0.000218634
kmer_AGGCTG	0.000218442
kmer_TACGA	0.000218206
kmer_GTAAGG	0.000218034
kmer_TTAA	0.000217964
kmer_GCAAAT	0.000217676
kmer_GCACA	0.000217543
kmer_TGCGGA	0.000217268
kmer_GGCTGG	0.000217219
kmer_CATAAT	0.000217004
kmer_GCGGGT	0.000216793
kmer_GCCTT	0.00021638
kmer_AATCCC	0.000216083
kmer_AAAGAA	0.000215832
kmer_TTCAG	0.000215666
kmer_CCCCAA	0.000215662
kmer_TATAT	0.000215354
kmer_GTGAT	0.000214647
kmer_CCTCAA	0.000214189
kmer_TGTTT	0.000214105
kmer_TATAC	0.000213699
kmer_GTAAGA	0.00021363
kmer_AGCCTG	0.000213614
kmer_AAGGT	0.00021333
kmer_TCCCG	0.000213312
kmer_ACAGG	0.000213076
kmer_GGAGT	0.000212901
kmer_TTCTTG	0.000212446
kmer_AGCGCG	0.000212189
kmer_ACAGCG	0.000212151
kmer_CCCAAA	0.000211814
kmer_CAGAGC	0.000211778
kmer_CTCAGT	0.000211517
kmer_CGCTGC	0.000211472
kmer_TTCGC	0.000211361
kmer_GCCAGC	0.000211297
kmer_GGCCAA	0.000210849
kmer_AGACG	0.000210597
kmer_GGGGCT	0.000210212
kmer_TATGTG	0.000210175
kmer_CCTTG	0.000210099
kmer_GCTTCC	0.000210098
kmer_GTCCC	0.000209813
kmer_GGACG	0.000209206
kmer_GATCCT	0.000209013
kmer_ATTGGA	0.000208834
kmer_TCGCCC	0.000208627
kmer_CCTCAC	0.000208183
kmer_GGGAC	0.000208089
kmer_CTAGCC	0.000208039
kmer_TCCTA	0.000208034
kmer_CAGCCA	0.000207903
kmer_CGCTCC	0.000207859
kmer_CCTCAG	0.000207767
kmer_GGCGGT	0.000207662
kmer_ACCGT	0.000207541
kmer_GCCGGC	0.00020718
kmer_CCATCC	0.000207142
kmer_AATGG	0.000206568
kmer_CGGTCT	0.000206568
kmer_TGCCA	0.000206385
kmer_CCAAG	0.000206202
kmer_ACGCA	0.000205792
kmer_GAGAT	0.000205776
kmer_AGTCG	0.000205766
kmer_TGAACA	0.000205619
kmer_CAATGG	0.000205405
kmer_GCCCCC	0.00020538
kmer_GGGTCC	0.00020528
kmer_TCACAG	0.000205074
kmer_TCACC	0.000204768
kmer_TAGAGC	0.000204749
kmer_CAGAC	0.000204645
kmer_TGTGAA	0.000204584
kmer_CGTTA	0.000204545
kmer_GCTGGG	0.000204423
kmer_GTGTT	0.000204135
kmer_GACAG	0.000203533
kmer_CCCTGG	0.000203465
kmer_CTGCAT	0.000203154
kmer_GACCCC	0.000203088
kmer_GTCTG	0.000202392
kmer_CTGCCG	0.000202321
kmer_ACAGA	0.000201921
kmer_CTTTGA	0.000201823
kmer_AGGGA	0.00020126
kmer_GCACAC	0.000201259
kmer_TCGGAG	0.000200909
kmer_GCGCCA	0.000200834
kmer_TGTCTG	0.000200745
kmer_TCTCAG	0.000200716
kmer_CCCGCC	0.000200437
kmer_CCCCCA	0.00020037
kmer_CATGGC	0.000200124
kmer_ACTCCC	0.000200121
kmer_CTCTTG	0.000199801
kmer_TACACC	0.000199701
kmer_CCTGCT	0.00019911
kmer_GCCGTG	0.000198825
kmer_GCGGGG	0.000198784
kmer_CGCAG	0.000198746
kmer_TCCAAG	0.000198406
kmer_ACAGT	0.000198335
kmer_TATGAG	0.000198323
kmer_GCCCAG	0.00019822
kmer_CGGCGA	0.000198163
kmer_AGTCA	0.000197941
kmer_GAAATC	0.000197857
kmer_CACTGC	0.000197849
kmer_CACGC	0.000197279
kmer_GCAGAG	0.000197188
kmer_GGCCCT	0.000196461
kmer_TCTTGG	0.00019636
kmer_TTGGA	0.00019635
kmer_ATGAAT	0.000196336
kmer_ATTTTG	0.000196188
kmer_ACTGCA	0.000196155
kmer_ACGCG	0.000195638
kmer_TCCAA	0.000195581
kmer_TAATG	0.000195275
kmer_TTAT	0.000195149
kmer_GCGACT	0.00019514
kmer_GGCCGC	0.000195004
kmer_CGGCT	0.000194956
kmer_AGTCT	0.000194235
kmer_CGCCCG	0.00019406
kmer_CTTCCT	0.000193906
kmer_CTTGA	0.000193904
kmer_CGCCCT	0.000193457
kmer_CCAGGA	0.00019333
kmer_ACCGC	0.000193041
kmer_GGGGGA	0.000192265
kmer_CCGTC	0.00019207
kmer_TGCGC	0.000191968
kmer_TTGGGT	0.000191544
kmer_GAGCCC	0.000191213
kmer_CTGCGT	0.000191034
kmer_ACTATA	0.000191005
kmer_GAGTG	0.000190944
kmer_ACTGGG	0.000190526
kmer_CCTGT	0.000190508
kmer_ACACGC	0.000190283
kmer_CCGCAC	0.000190266
kmer_CGAGG	0.000190236
kmer_CCGGGG	0.000189934
kmer_TCGGG	0.000189717
kmer_AATATT	0.000189319
kmer_GCTAGT	0.000189224
kmer_CTTCG	0.000189222
kmer_ACCTG	0.000189213
kmer_CGAT	0.000188668
kmer_GTGAG	0.000188542
kmer_CTCTAA	0.000187756
kmer_GTCAG	0.000187709
kmer_CTCGCT	0.000187589
kmer_GCGCAG	0.000187507
kmer_GCGTCC	0.000187288
kmer_AGGTT	0.000186898
kmer_TGAGCA	0.00018684
kmer_TCCAGC	0.000186557
kmer_CGGGAG	0.000186404
kmer_CAAAC	0.000186101
kmer_GTGTGG	0.000185843
kmer_CTGTG	0.000185065
kmer_TGGAAT	0.000184925
kmer_GGAGGA	0.000184816
kmer_CAAAA	0.000184729
kmer_GTGTC	0.000184655
kmer_ACCGG	0.000184469
kmer_TTGTGG	0.00018446
kmer_GATGCC	0.000184357
kmer_CACCG	0.000184115
kmer_CGTGCT	0.000184012
kmer_ACCCG	0.000183888
kmer_CTGTT	0.000183813
kmer_TTTTAT	0.000183684
kmer_AATGAT	0.000183461
kmer_ACGAGG	0.000183387
kmer_CCCCAC	0.000183367
kmer_GCGCG	0.000183254
kmer_AACCCG	0.000183056
kmer_AAAAAG	0.00018304
kmer_GGCGCG	0.000182856
kmer_CATTCC	0.000182767
kmer_GCTGCC	0.000182622
kmer_ACTTG	0.000182618
kmer_GACTGC	0.000182564
kmer_TTGGCG	0.000182496
kmer_GATGT	0.000182483
kmer_CTGGGA	0.000182428
kmer_TCCCAG	0.000182339
kmer_CCACTG	0.000182279
kmer_GTAAG	0.000181839
kmer_TAGCTG	0.00018177
kmer_GCGTT	0.000181686
kmer_ATCTT	0.000181449
kmer_GGACGA	0.000181064
kmer_GTGCA	0.000181023
kmer_GCGTG	0.000180953
kmer_GGAGGT	0.000180586
kmer_CTCTCT	0.000180309
kmer_TACT	0.000180211
kmer_CCGTCC	0.000180092
kmer_CCTAG	0.000180012
kmer_TCTACC	0.000179964
kmer_CCCCGG	0.000179318
kmer_ACTTT	0.00017917
kmer_ATCCG	0.000179157
kmer_GCCCTG	0.000178956
kmer_CACAAG	0.000178841
kmer_TACCCT	0.000178723
kmer_CGGCTG	0.000178686
kmer_AGACCC	0.000178133
kmer_TCTGT	0.000177993
kmer_CCCCGC	0.000177769
kmer_GAATGA	0.000177622
kmer_TGCAAA	0.000177539
kmer_TAACA	0.00017747
kmer_CGTTTC	0.000177449
kmer_GTAT	0.000177407
kmer_ATGACT	0.000177125
kmer_CTGACC	0.000177069
kmer_TGAGGC	0.000176795
kmer_TGTCC	0.000176725
kmer_AACCC	0.000176673
kmer_TGCGA	0.000176455
kmer_GAATA	0.000176334
kmer_TTGGAG	0.000176288
kmer_CATCCT	0.000176
kmer_TTCCTG	0.000175529
kmer_GAGTCG	0.000175245
kmer_ATAAA	0.000175028
kmer_GACCT	0.000174896
kmer_TGAAGT	0.000174788
kmer_TAAAAA	0.00017455
kmer_AAGACC	0.000174395
kmer_CTGCCT	0.000174308
kmer_CGGGCA	0.00017414
kmer_AACTTT	0.000174114
kmer_ACCCCA	0.000174048
kmer_CGCGCG	0.000173808
kmer_ATGCTG	0.000173723
kmer_TGTTCC	0.000173629
kmer_AGAACA	0.000173615
kmer_TGCTGC	0.000173587
kmer_GAGCGC	0.000173579
kmer_GCAGCC	0.000173561
kmer_GAGCTT	0.000173129
kmer_GGCCCG	0.000173043
kmer_GAAAAC	0.000172957
kmer_TGTGCA	0.000172848
kmer_TTCAGT	0.000172778
kmer_TCCGAG	0.000172737
kmer_AGCTTC	0.000172582
kmer_CAGGGC	0.000172196
kmer_GCCTA	0.000172165
kmer_GACTCC	0.00017214
kmer_GAGTT	0.000172128
kmer_TCAAC	0.000171824
kmer_GAAGTC	0.000171548
kmer_GTCTCC	0.000171524
kmer_AGGTA	0.000171412
kmer_CTGAGG	0.000171268
kmer_GGGTCG	0.000171167
kmer_GTGAAC	0.000170763
kmer_GAGGCG	0.000170751
kmer_GGCCGG	0.000170152
kmer_ACGTTT	0.000169868
kmer_TGGTT	0.000169372
kmer_GCCCGA	0.000169001
kmer_AGTCGG	0.000168823
kmer_CAGAGG	0.000168562
kmer_CGCTCA	0.000168339
kmer_TTTGC	0.000168291
kmer_ACGAA	0.000167911
kmer_GGCTCC	0.000167456
kmer_CGCCAT	0.000167393
kmer_AGCAT	0.000167089
kmer_AAGGGG	0.000166968
kmer_AAGCCG	0.00016694
kmer_TGTAG	0.000166495
kmer_GGCAA	0.000166488
kmer_CTTTCC	0.00016641
kmer_ACGGA	0.000166309
kmer_ACATGT	0.000165885
kmer_CAGGAA	0.000165861
kmer_CCTCTG	0.000165801
kmer_CCTACA	0.000165687
kmer_TGCCTG	0.00016568
kmer_TTCTTC	0.000165459
kmer_TGACA	0.000165308
kmer_GCCCCT	0.000165216
kmer_AACAA	0.00016518
kmer_AATAG	0.000164882
kmer_CCGTTC	0.000164791
kmer_AATGA	0.000164516
kmer_GGGCTG	0.000164383
kmer_TCGGA	0.000164159
kmer_TCGGAC	0.000164027
kmer_ACTGAG	0.000163984
kmer_GGCTGC	0.000163938
kmer_CTCCTG	0.00016372
kmer_GGCAGG	0.000163716
kmer_CAGCTC	0.000163605
kmer_CCTTGC	0.000163404
kmer_CGCAC	0.000163357
kmer_AGGGGC	0.000163212
kmer_TCCCGG	0.000163033
kmer_GCGGGC	0.000162776
kmer_TTGAA	0.000162603
kmer_GAACAC	0.000162564
kmer_GCCGTT	0.000162482
kmer_GAAGC	0.000162151
kmer_CCCTA	0.000162077
kmer_GGATGC	0.000162066
kmer_CATCT	0.00016206
kmer_TCTCCA	0.000162036
kmer_TGAAC	0.000161977
kmer_GAGGGG	0.000161957
kmer_AAAAC	0.00016149
kmer_GAACTG	0.000161479
kmer_ACTGCT	0.000161376
kmer_GTGCAG	0.000160392
kmer_GCCTCC	0.000160157
kmer_TGACGA	0.000160138
kmer_GAGCTG	0.000159917
kmer_TCTTTT	0.000159868
kmer_CAGGAG	0.000159691
kmer_TTGGGG	0.000159644
kmer_GACGG	0.000159111
kmer_GACTGG	0.000159018
kmer_AAGGCT	0.000159014
kmer_CTCCTT	0.000158961
kmer_ATATTT	0.000158941
kmer_TCGCCT	0.000158705
kmer_ACCTC	0.000158499
kmer_AGCAC	0.000158433
kmer_GCCGGA	0.000158372
kmer_AGAGCC	0.00015829
kmer_AGCCGT	0.000158229
kmer_GCCGGG	0.000158118
kmer_CTCTAC	0.00015803
low_query	0.000157588
kmer_CCAAGA	0.000157587
kmer_CCCTCG	0.000157422
kmer_GAAACC	0.000157318
kmer_AGGGT	0.000157316
kmer_GTGGCT	0.000157271
kmer_CAGTCA	0.000157258
kmer_CCCGGG	0.000157217
kmer_TACTGC	0.000157188
kmer_TTCCCT	0.000156434
kmer_CTCCAC	0.000156395
kmer_CATAT	0.000156368
kmer_CCTCCC	0.000156002
kmer_TTGCC	0.000155936
kmer_CTCCCG	0.000155929
kmer_GTGCCA	0.000155794
kmer_TGCCAG	0.000155731
kmer_TACCT	0.000155664
kmer_TATAAG	0.000155663
kmer_TGCAGG	0.000155571
kmer_AAACA	0.000155482
kmer_GGGAGG	0.000155229
kmer_GCCATT	0.000155228
kmer_GAAGGA	0.000155159
kmer_CGGATG	0.00015511
kmer_TCCGCT	0.00015508
kmer_ATGCAG	0.000154719
kmer_TGGCCG	0.000154565
kmer_AAACC	0.000154474
kmer_TACCTT	0.000154427
kmer_AGCGCC	0.000154207
kmer_GAAAC	0.000154201
kmer_AAGGAA	0.000154171
kmer_CGAGGG	0.000153912
kmer_CTCCTC	0.000153676
kmer_TTGTG	0.000153672
kmer_GGCAC	0.000153414
kmer_ATGGTA	0.000153327
kmer_TGGAA	0.00015325
kmer_CCCGA	0.000153241
kmer_CAATGT	0.000153112
kmer_TTCGT	0.000152923
kmer_CATCCC	0.000152771
kmer_ATGATA	0.000152499
kmer_AATCAG	0.000152482
kmer_CCAAAC	0.000152237
kmer_CTCGCG	0.000152226
kmer_CCAGTC	0.000151838
kmer_TCAGA	0.000151788
kmer_GCGCGC	0.000151756
kmer_TGAGCC	0.000151507
kmer_TAATCA	0.000151438
kmer_CGTGG	0.000151364
kmer_CCAAC	0.000151259
kmer_CCAGAA	0.000151181
kmer_ATAAGG	0.00015116
kmer_AGCCGG	0.000151075
kmer_CTGCCC	0.000150618
kmer_GCCGAG	0.00015052
kmer_AAACCC	0.000150385
kmer_GAACC	0.000150384
kmer_AGGAT	0.000150325
kmer_CTCTGG	0.000150303
kmer_GGCGT	0.000150269
kmer_CTTGTA	0.000150115
kmer_CGAAG	0.000150063
kmer_GCGAA	0.000150041
kmer_GGAGCT	0.000149663
kmer_ATCGC	0.000149517
kmer_GCACG	0.000149461
kmer_TGGCCC	0.000149402
kmer_TTAAA	0.000149268
kmer_CGCGA	0.000149143
kmer_GATA	0.000148908
kmer_TCTTTG	0.000148826
kmer_AGAGGC	0.000148809
kmer_GCCCAC	0.000148804
kmer_TGCGT	0.00014871
kmer_AGCGT	0.000148687
kmer_TTGTC	0.000148581
kmer_GTTTCG	0.000148581
kmer_TGGCAA	0.000148452
kmer_AGTCGC	0.000148451
kmer_TCCTCC	0.00014808
kmer_TGCCGG	0.000148077
kmer_CTGGCC	0.000147753
kmer_AGTCCA	0.000147685
kmer_AAGCC	0.000147475
kmer_CTAATA	0.000147459
kmer_CCGCA	0.000147411
kmer_GACCAC	0.000147381
kmer_TGGAAA	0.000147248
kmer_TCCTGA	0.00014702
kmer_TTCCTC	0.000146942
kmer_AGAACC	0.000146869
kmer_AGGAAG	0.000146781
kmer_AGACCT	0.000146738
kmer_CCAGCT	0.000146437
kmer_TGCGAC	0.000146391
kmer_GCTCCG	0.000145621
kmer_TTACGG	0.000145586
kmer_TGCCAT	0.000145446
kmer_CGCGCT	0.000145346
kmer_AGCTCC	0.000145341
kmer_TGTCGG	0.000145314
kmer_TCAGAG	0.00014525
kmer_CTGGGC	0.000145248
kmer_CACCT	0.000145083
kmer_CACAA	0.000144823
kmer_GGCGCT	0.000144798
kmer_TGTGC	0.000144782
kmer_AGTAAG	0.000144776
kmer_TCTCCT	0.00014474
kmer_AAGATG	0.00014466
kmer_CGCGGA	0.0001444
kmer_AGAAGG	0.000144095
kmer_GGCAT	0.000144029
kmer_ATTCC	0.000144024
kmer_ACAAG	0.000143977
kmer_GGATGG	0.00014395
kmer_TCATG	0.000143821
kmer_CAACC	0.000143767
kmer_TAAAG	0.000143694
kmer_CCCAGA	0.000143377
kmer_TAAGAA	0.000143334
kmer_GCGAAC	0.000143127
kmer_TTGTA	0.000143033
kmer_TTAAAG	0.000142937
kmer_ACCGA	0.000142907
kmer_CTGGCA	0.00014262
kmer_CCCGCG	0.000142561
kmer_GCGCA	0.000142261
kmer_ACATG	0.000142191
kmer_ACTCCG	0.000142005
kmer_AAAGC	0.000141982
kmer_CGCGAA	0.000141925
kmer_ATGTG	0.000141385
kmer_GCTCGC	0.000141324
kmer_ACATAG	0.000141263
kmer_CTGCTC	0.000141222
kmer_GTTTTC	0.000141018
kmer_CGTCA	0.000141007
kmer_ATAG	0.000140277
kmer_GTTTCC	0.000140186
kmer_TGCACC	0.000140095
kmer_AAAAA	0.000139995
kmer_ATAAT	0.000139855
kmer_GTCTTC	0.00013964
kmer_AGTTTG	0.000139526
kmer_GCTGTG	0.000139456
kmer_ATACA	0.000139447
kmer_TATCCC	0.000139381
kmer_ACCATG	0.000138999
kmer_CGTTT	0.000138987
kmer_TGAGAG	0.000138892
kmer_GCGGCT	0.000138861
kmer_TGTGAG	0.000138754
kmer_AGCGGC	0.000138754
kmer_CAGCGC	0.000138666
kmer_CACGAG	0.000138619
kmer_CGACCA	0.000138521
kmer_CGAGAT	0.000137978
kmer_CGGTGC	0.000137934
kmer_CCCACG	0.000137903
kmer_GAGGCC	0.000137891
kmer_TCCTGG	0.000137817
kmer_TCTCAA	0.000137486
kmer_GAGGAA	0.000137334
kmer_CCCGCT	0.000137201
kmer_TAGGC	0.00013718
kmer_CCTAC	0.000137089
kmer_ACGCCC	0.00013702
kmer_GCATT	0.000136967
kmer_CTTGT	0.000136802
kmer_AAGGTG	0.000136632
kmer_TCATCT	0.000136386
kmer_AGGTTG	0.000136281
kmer_TAAAC	0.000136165
kmer_GGCGGA	0.000136052
kmer_GCACAG	0.000136041
kmer_CGGGCC	0.000135481
kmer_CTGACG	0.000135474
kmer_CTACCT	0.000135408
kmer_GCAAGG	0.000135109
kmer_ACTGA	0.000134987
kmer_ATGAG	0.000134966
kmer_AAAGAT	0.000134834
kmer_ATGGCC	0.000134735
kmer_GCCACG	0.000134677
kmer_CCGTCT	0.000134625
kmer_TACGAG	0.000134366
kmer_GTCTT	0.000133853
kmer_GCCCGT	0.000133794
kmer_GTTAA	0.000133715
kmer_TATTG	0.000133696
kmer_TTGGCT	0.000133493
kmer_CTAGTT	0.000133488
kmer_TAGCT	0.000133479
kmer_GGGCGG	0.000133109
kmer_CTCCCA	0.000133074
kmer_CCCTAT	0.000133003
kmer_CCGACC	0.000132988
kmer_AAATAT	0.00013295
kmer_CGAGT	0.000132923
kmer_CAGGTG	0.000132916
kmer_ACGCT	0.000132858
kmer_GCCTTG	0.000132756
kmer_ATCCCC	0.000132607
kmer_GCTTAC	0.000132489
kmer_AGGCGA	0.000132403
kmer_TGCAT	0.000132174
kmer_AAGGAG	0.0001321
kmer_CAGGCG	0.000131923
kmer_GATATT	0.000131537
kmer_GCTCG	0.000131439
kmer_AAGGCG	0.000131348
kmer_AACAG	0.000131238
kmer_TGCTCC	0.000130917
kmer_TTCCA	0.00013078
kmer_GCTTTC	0.000130655
kmer_GGGAGA	0.000130505
kmer_TAAGT	0.000130326
kmer_CAATG	0.000130268
kmer_AACCT	0.000130186
kmer_GTGGGG	0.000130136
kmer_TTCAGG	0.000129882
kmer_AGGTC	0.000129545
kmer_CCCTCC	0.000129512
kmer_CTTGAG	0.000129431
kmer_AAACT	0.000129376
kmer_TGGTGT	0.00012925
kmer_TGCAC	0.000129181
kmer_CGCCTC	0.0001291
kmer_ATAGA	0.000128877
kmer_CGTCTC	0.000128733
kmer_ACCACG	0.000128361
kmer_TCATT	0.000128318
kmer_CGGCGC	0.000128286
kmer_TCATTG	0.00012821
kmer_CTTCTT	0.000128172
kmer_GCATG	0.000128167
kmer_AGCTGC	0.000128153
kmer_CGGCCG	0.000128086
kmer_CAGACA	0.000128056
kmer_TCCCCC	0.000127974
kmer_GTATGT	0.000127868
kmer_CCGTGG	0.000127828
kmer_TCATC	0.000127828
kmer_TAGCCC	0.000127629
kmer_TTTTTC	0.00012746
kmer_AATCG	0.000127286
kmer_GTAGCC	0.000127252
kmer_TGGGCA	0.000127218
kmer_AGAGT	0.000127185
kmer_CATATA	0.000127155
kmer_CATTT	0.000127128
kmer_AGACAA	0.000127039
kmer_CTCGCA	0.000127033
kmer_TCATCC	0.000126616
kmer_CGGGGA	0.000126545
kmer_AAGTGG	0.000126486
kmer_TTTGA	0.000126418
kmer_GTTCT	0.000126321
kmer_GCGGTG	0.000126229
kmer_AAGATA	0.000126098
kmer_TAGAT	0.000126022
kmer_CTCGAG	0.000125762
kmer_GGAGAC	0.000125755
kmer_GCGGTA	0.000125745
kmer_TGTTG	0.000125702
kmer_GCGCCT	0.000125506
kmer_CCTGGG	0.000125455
kmer_AATAAA	0.000125357
kmer_AGAGGT	0.000125324
kmer_TCACAA	0.000125225
kmer_GTGGCC	0.000125196
kmer_TTCGG	0.000125121
kmer_TCCCAC	0.000124955
kmer_AGGAGA	0.000124885
kmer_AACTG	0.000124806
kmer_TTTCCG	0.000124715
kmer_GTACTG	0.000124661
kmer_CGCGCC	0.000124437
kmer_CTCAGA	0.000124364
kmer_CATCG	0.000124286
kmer_GTCGCC	0.000124186
kmer_GTATT	0.00012396
kmer_AGCGAC	0.000123893
kmer_AATGTG	0.000123827
kmer_CGTGA	0.000123794
kmer_GGCTA	0.000123687
kmer_TATTGA	0.000123455
kmer_ACATC	0.000123359
kmer_TATTTT	0.000123279
kmer_AGGCGG	0.000123199
kmer_GGTGTG	0.000123096
kmer_ATAGC	0.000122876
kmer_GCAAC	0.000122789
kmer_GGGAAG	0.000122665
kmer_CGCTGG	0.000122643
kmer_AGAAAC	0.000122448
kmer_CCGAGC	0.000122352
kmer_GGTAA	0.000122248
kmer_CACGT	0.000122233
kmer_GGTCA	0.000122092
kmer_TTCATA	0.000121952
kmer_TTGGT	0.000121868
kmer_GCTCTT	0.000121791
kmer_ACCTCC	0.000121781
kmer_CCCGAG	0.000121753
kmer_GAGTGC	0.000121649
kmer_TTTGTC	0.000121538
kmer_GCCAAT	0.000121402
kmer_TTGCG	0.000121249
kmer_GCGCGA	0.00012111
kmer_GCTAG	0.000121003
kmer_ATTTTA	0.000120839
kmer_TCAGCG	0.000120826
kmer_AAGTT	0.000120502
kmer_GGTGTC	0.000120441
kmer_AGATGC	0.000120195
kmer_GTTGTG	0.000120045
kmer_GGGTGA	0.000120013
kmer_CCGCCT	0.000119964
kmer_AACATG	0.000119908
kmer_GCTGTA	0.000119891
kmer_ATGAC	0.000119868
kmer_TATGCA	0.000119858
kmer_TTCAA	0.000119704
kmer_TGTTC	0.000119688
kmer_GAAGGG	0.000119685
kmer_AGGGGG	0.000119638
kmer_GACGCC	0.000119513
kmer_ACGTT	0.000119371
kmer_GGTCG	0.000119318
kmer_TGACAG	0.000119046
kmer_AGACGC	0.000118966
kmer_AACGAA	0.000118894
kmer_CCCGCA	0.00011877
kmer_GGAAGA	0.000118769
kmer_AACCAC	0.000118552
kmer_CGGCA	0.000118414
kmer_TACAC	0.000118396
kmer_TTTCAA	0.00011825
kmer_GGCGCA	0.000118075
kmer_TGTGT	0.000118031
kmer_TGACCC	0.000117987
kmer_GAGGGT	0.000117902
kmer_CTGTCT	0.000117798
kmer_GTGGA	0.000117789
kmer_CGGTT	0.000117784
kmer_GTGCCG	0.000117747
high_query	0.000117661
kmer_TGCCGC	0.000117589
kmer_GCCTGT	0.000117439
kmer_TAGCAG	0.000117372
kmer_ATGTCA	0.00011724
kmer_GTGCAC	0.00011723
kmer_TCTTCC	0.000117173
kmer_CATCCA	0.000117032
kmer_CACAGC	0.000116951
kmer_CAAAGG	0.00011692
kmer_GTCCCA	0.000116905
kmer_GATTG	0.000116751
kmer_GCGAC	0.000116712
kmer_CCACAG	0.000116597
kmer_GCAGCT	0.00011658
kmer_GACAA	0.000116551
kmer_ACGGC	0.000116181
kmer_TCGGC	0.000116032
kmer_CGGCCA	0.000116
kmer_GCGAGG	0.000115997
kmer_CAGCCG	0.000115978
kmer_TGGGCG	0.00011593
kmer_TTTTA	0.000115676
kmer_TGGGCC	0.000115435
kmer_TCCGCG	0.00011543
kmer_GAGGTT	0.000115416
kmer_GCGAGC	0.000115386
kmer_ACTAA	0.00011538
kmer_TCACCC	0.000115235
kmer_CTTTTT	0.000115133
kmer_AAAGTG	0.000115099
kmer_CGCGGG	0.00011508
kmer_CTAATG	0.000114902
kmer_TGGAGG	0.00011488
kmer_TTTAT	0.000114826
kmer_TCTGGT	0.000114407
kmer_GGAGCA	0.000114334
kmer_GCTCGG	0.000114298
kmer_AGGCCC	0.000114228
kmer_ACTCTC	0.000114217
kmer_TGACTT	0.000113923
kmer_GGCCTT	0.00011387
kmer_GCAGGC	0.000113824
kmer_GGGTA	0.000113769
kmer_CAAGAG	0.000113734
kmer_ATCTC	0.000113729
kmer_CTCCCT	0.000113719
kmer_ACATGG	0.000113567
kmer_GTATC	0.00011348
kmer_CACTT	0.000113388
kmer_TGGAGA	0.000113319
kmer_GATAAG	0.000113149
kmer_GTACG	0.000113114
kmer_GCACCA	0.000113032
kmer_AGCCAT	0.00011292
kmer_GTGAGG	0.000112802
kmer_GTGGCG	0.000112787
kmer_CCCACT	0.0001127
kmer_AGAACG	0.000112656
[truncated: 3,496 more rows]

## Sheet: PC3
Feature	Importance
high_query	0.0176583
low_query	0.00989522
energy_Gquad_last50bp	0.00800129
CGperc	0.00712878
energy_last30bp	0.00519834
kmer_ATG	0.00443579
kmer_GGGC	0.00433336
kmer_GGCC	0.0042783
kmer_GGC	0.0038107
kmer_GGG	0.00373756
kmer_GCCC	0.00373455
kmer_GG	0.00337718
kmer_CCC	0.00320405
kmer_GGCCC	0.00315395
energy_5cap	0.00313127
kmer_TT	0.00310236
kmer_GCC	0.00304217
kmer_T	0.00297095
kmer_CG	0.00296135
kmer_CC	0.00294542
kmer_GT	0.00266456
kmer_CGGG	0.00265515
kmer_CGG	0.00248396
kmer_GGGG	0.00246265
kmer_G	0.0024616
kmer_GGGCC	0.00234596
kmer_GC	0.00234379
kmer_TC	0.00232375
energy_Gquad_5cap	0.00227095
kmer_A	0.00225401
kmer_GGGGC	0.00222249
kmer_CCCC	0.00222147
kmer_GCCCC	0.00219238
kmer_TCG	0.00213735
kmer_C	0.00212009
kmer_CCGG	0.0020764
kmer_GCCCG	0.00194571
energy_whole	0.00193507
kmer_CCG	0.00191777
kmer_TTC	0.00189606
codon_G	0.00187407
kmer_CCGGG	0.00187288
kmer_CCCG	0.00186296
kmer_GTT	0.00186026
kmer_GATG	0.00181531
kmer_TGG	0.00180514
kmer_AA	0.00180185
energy_Gquad_5utr	0.00176625
kmer_GCG	0.0017587
codon_P	0.00173752
kmer_CCCGG	0.00168023
kmer_CGGGG	0.00164595
kmer_GGCCCG	0.00159245
kmer_TA	0.00155891
kmer_TCT	0.00153612
kmer_GCCCGG	0.00153401
kmer_CGGGC	0.00153386
CGratio	0.00152043
kmer_AG	0.00150602
kmer_TG	0.00150161
kmer_AGG	0.00149407
kmer_GCGG	0.0014866
kmer_TTT	0.00147321
kmer_CATG	0.00147131
uAUG	0.00144098
kmer_GGCCCC	0.00143013
kmer_CCA	0.00141922
kmer_CGGC	0.00141855
kmer_ATGC	0.00141241
kmer_TGGG	0.00141195
kmer_CCAG	0.00140882
kmer_TTG	0.00140624
kmer_CTG	0.00139993
kmer_CA	0.0013983
kmer_AGT	0.00134824
kmer_CTT	0.00134275
kmer_CGGCC	0.00132567
kmer_CT	0.00131999
kmer_GA	0.00131371
kmer_GAA	0.00131046
kmer_CCCA	0.00130738
kmer_CTC	0.00130456
kmer_AT	0.00130254
kmer_GTC	0.00130036
kmer_CCCCGG	0.00129786
kmer_AC	0.00129647
kmer_CCATG	0.00129487
kmer_GGT	0.00129049
kmer_CCTGG	0.00128534
kmer_CCCGGC	0.00127018
kmer_CCT	0.00127004
kmer_CCCGGG	0.0012679
kmer_GCCG	0.00126643
kmer_CCCCG	0.00126123
kmer_CAG	0.0012601
kmer_GGCG	0.00125978
kmer_CGC	0.00125932
kmer_GGCCG	0.00125642
kmer_CCCCC	0.00125028
kmer_CAGG	0.00124286
kmer_CGCC	0.00123839
kmer_TGGA	0.00123787
kmer_GGGCCC	0.00123408
kmer_GAG	0.00123086
kmer_CTGG	0.00122847
kmer_GCT	0.00122003
kmer_CCCAG	0.00120792
kmer_AGCCC	0.00120572
kmer_GGGCG	0.00120369
kmer_GTG	0.00119966
kmer_CCTG	0.001198
kmer_AGA	0.00119323
kmer_GGA	0.00118987
kmer_TGC	0.00118174
kmer_GCA	0.0011755
kmer_CGT	0.00116915
kmer_AGC	0.00116494
kmer_ATGA	0.0011577
kmer_CGA	0.00115756
kmer_TGT	0.00115539
kmer_GAT	0.00114497
codon_A	0.0011393
kmer_GAC	0.00113428
ATratio	0.00113247
kmer_CAC	0.00112835
kmer_CCGC	0.00112676
kmer_ATT	0.00111977
kmer_GCTG	0.00111423
kmer_TCC	0.0011122
utrlen_m80	0.00110927
kmer_TGA	0.00110265
codon_L	0.00109957
kmer_CCAGG	0.00109528
codon_F	0.00109133
kmer_CCCT	0.00108801
kmer_AGCC	0.0010827
kmer_GGCCGG	0.00108125
kmer_ATGG	0.00107996
kmer_CAT	0.00107923
kmer_CAGC	0.00105654
kmer_AAA	0.00105312
codon_R	0.0010517
kmer_AAG	0.00105157
codon_S	0.00104982
kmer_GCCCCC	0.00104889
kmer_TCA	0.00104218
kmer_AAC	0.00104089
kmer_CGGGGC	0.00103583
kmer_AGGC	0.00103342
kmer_GCAG	0.00103147
kmer_TGGC	0.0010254
kmer_CCGGGG	0.00102268
kmer_GGGGG	0.0010226
kmer_ACCC	0.00101642
kmer_GGCT	0.00101103
kmer_GAGC	0.00101062
kmer_GCCT	0.00101028
kmer_CTGC	0.00100706
kmer_TAC	0.00100566
kmer_ACC	0.00100002
kmer_GCGC	0.000989422
kmer_GCCGG	0.000980536
kmer_GCCA	0.000972223
kmer_CCGGGC	0.000959517
kmer_ACA	0.000952989
kmer_CCGGC	0.000952462
kmer_GTGG	0.000950489
kmer_CTCC	0.000945826
kmer_ACT	0.000945623
kmer_ACG	0.00094534
codon_V	0.000939126
kmer_TCGC	0.000938273
kmer_CAA	0.000936665
kmer_GCGGC	0.00093537
kmer_GGATG	0.000925865
kmer_GGCGC	0.00092261
kmer_GGAG	0.000920651
kmer_TTTC	0.000918783
codon_T	0.000916723
kmer_CCCCA	0.000913578
kmer_GCGCC	0.000912659
kmer_CGGGCC	0.000912089
kmer_TGCC	0.000911951
kmer_CGCGG	0.00090618
kmer_GGGA	0.000904959
kmer_CTGGG	0.000904282
kmer_GCTC	0.000903772
kmer_TTGC	0.000900218
kmer_CCAT	0.000899695
kmer_GCCCCG	0.000897069
kmer_GGAC	0.000896677
kmer_CCTC	0.000894855
kmer_CGCG	0.000894762
kmer_GGGGCC	0.000889918
kmer_GGTG	0.000886759
kmer_AGCG	0.000883651
kmer_TGAG	0.000881694
kmer_CTA	0.000873077
kmer_CCCCCG	0.000864621
codon_Q	0.000863811
kmer_GGCA	0.000854919
kmer_GCGGG	0.000854101
kmer_CGGCCC	0.000846943
kmer_GCGGCC	0.000842528
kmer_GAGG	0.000841683
kmer_CGGCG	0.000839938
kmer_TTCT	0.00083815
kmer_GGCGG	0.000837879
kmer_AGGG	0.000832707
kmer_GGAA	0.000830798
kmer_ATC	0.000829095
kmer_CCCTG	0.000827513
kmer_TCCA	0.000825555
kmer_CTGA	0.000822673
codon_W	0.000821237
kmer_TCCC	0.000818774
codon_E	0.000816353
kmer_GACC	0.000815628
kmer_AGGA	0.000810672
kmer_GAAG	0.000809736
codon_C	0.000808329
kmer_GGCTG	0.000803754
kmer_CGCT	0.000800859
kmer_CCGA	0.000800541
kmer_AAT	0.000794255
kmer_CGCCG	0.000789245
codon_M	0.00078886
kmer_CAGA	0.000787165
kmer_TTCC	0.000786237
kmer_CCGCC	0.000785674
codon_K	0.000783233
kmer_CCAC	0.000782239
codon_*	0.000780068
kmer_CGGCGC	0.000778912
kmer_CTCT	0.000772967
kmer_TGCCC	0.000772002
kmer_GAGCC	0.000771509
kmer_ATGAG	0.000768434
kmer_GCCGGG	0.000766386
kmer_CGGA	0.000766064
kmer_GGGT	0.000763967
kmer_CTCG	0.000763618
kmer_TGCG	0.000757412
kmer_TCTC	0.000756102
kmer_CACC	0.000755529
kmer_CGAG	0.000750278
kmer_GCCGC	0.000746515
kmer_AGGT	0.000744097
codon_D	0.000743415
kmer_CTGT	0.000741294
kmer_GTTT	0.000739737
kmer_CCGCG	0.00073943
kmer_CCCGA	0.000739427
kmer_TCCT	0.00073933
kmer_TCGG	0.000735607
kmer_GGTT	0.00073457
kmer_ATGAGC	0.000732556
kmer_TTTT	0.000732002
kmer_GGCGCC	0.000731815
kmer_GGGATG	0.000731592
kmer_GTGC	0.000730343
kmer_GAGA	0.000729489
codon_H	0.000726774
kmer_CCTT	0.000722091
kmer_GTCC	0.000720814
kmer_GCCATG	0.000717885
kmer_CTTC	0.000717417
kmer_AGCT	0.00071501
kmer_TGGGG	0.000713057
kmer_GGTC	0.000712231
kmer_GTGA	0.00071211
kmer_GGCGGC	0.000711698
kmer_TCTG	0.000710658
kmer_GGCCT	0.000709283
kmer_GCTGC	0.000708755
kmer_TGCT	0.000707893
kmer_GGGCGC	0.000707034
codon_N	0.0007053
kmer_TCCG	0.000704711
kmer_TAG	0.000702298
codon_I	0.000701499
kmer_CGGGGG	0.000699288
kmer_TGAA	0.000698298
kmer_TTA	0.000697034
kmer_CTTG	0.000694888
kmer_GGAT	0.000694833
kmer_TTCTC	0.000692113
kmer_CTGCC	0.000691769
kmer_CGCCC	0.000688919
kmer_TAA	0.000682633
kmer_AGAG	0.000681793
kmer_AAAG	0.000677314
kmer_TGGT	0.000676618
kmer_GAGT	0.00067405
kmer_AGGCC	0.000671537
kmer_GAGCCC	0.000667845
kmer_GTCG	0.000665951
kmer_GAAA	0.00066531
kmer_CGCCGC	0.00066465
kmer_ACAG	0.000664474
kmer_CCGGCC	0.000662798
kmer_TCTT	0.000655616
uORF	0.000655331
kmer_GTA	0.000650937
kmer_TCAG	0.000650837
kmer_AATG	0.000650147
kmer_GGAGC	0.000650003
kmer_GCCCCA	0.00064761
kmer_TGTC	0.000646728
kmer_CGGT	0.000646166
kmer_CAGT	0.000644816
kmer_GCCCT	0.000643766
kmer_ACCT	0.000643419
kmer_GGCCTG	0.00064314
kmer_TGTG	0.000640533
kmer_AGCA	0.000639638
kmer_TTGG	0.000639599
kmer_ATGGG	0.000638217
kmer_GCCTC	0.000631557
kmer_GCGA	0.000630808
kmer_GCGGGC	0.000629036
kmer_AGGAC	0.000628313
kmer_AAGC	0.000626438
kmer_GCGCCG	0.000625617
kmer_CGCA	0.000624871
kmer_GGCCA	0.000623915
kmer_CAGCC	0.000623575
kmer_AGTG	0.000620424
kmer_ATTT	0.000618611
kmer_GACA	0.000618092
kmer_GCAGC	0.000618006
kmer_GCCCA	0.000617971
kmer_CGTC	0.000616909
kmer_TGGGC	0.000615752
kmer_CTGGC	0.000614961
kmer_AAGG	0.000610895
kmer_TGAC	0.000610209
kmer_GCTT	0.00060971
kmer_GTTC	0.000608479
kmer_GGGGGC	0.000608224
kmer_GCCGCC	0.000608086
kmer_CTCA	0.000606244
kmer_GCCTG	0.00060618
kmer_GGGCT	0.000605744
kmer_AAGA	0.000603089
kmer_GAGGC	0.000602646
kmer_GCGT	0.00059842
kmer_GCAC	0.000596959
kmer_CAGGC	0.000593164
kmer_CGCGGG	0.000592929
kmer_CCCGC	0.000592878
kmer_ATGGA	0.000591788
kmer_AGTT	0.000591599
kmer_CCTCC	0.000589408
kmer_AGAA	0.000587917
kmer_ACTG	0.000581969
kmer_CTCCC	0.000581429
kmer_CATGC	0.00058106
kmer_CCCGAG	0.000579282
kmer_CGGGCG	0.000578967
kmer_AGAC	0.000577706
kmer_CCTCA	0.000576617
kmer_CCGCCG	0.000575775
kmer_CTGGGG	0.000575081
kmer_ATGT	0.00057433
kmer_GGGCCG	0.000573209
kmer_CACT	0.000572574
kmer_ATTTT	0.000572508
kmer_GCTCC	0.000572173
kmer_GGGAG	0.000572086
kmer_TGCA	0.000570554
kmer_TGGCCC	0.000567356
kmer_ACTC	0.000566957
kmer_CGTG	0.000564326
kmer_CCTGGG	0.000563449
kmer_TGCGG	0.00056342
kmer_GAAC	0.00056073
kmer_GTCT	0.000560395
kmer_CGCCA	0.000558781
kmer_ACCG	0.000558681
kmer_TGAGC	0.000558664
kmer_AGTC	0.000555918
kmer_GTTG	0.000554453
kmer_GACT	0.00055424
kmer_CCAGGC	0.000554142
kmer_CCGAG	0.000553518
kmer_GCGGGG	0.000552493
kmer_CGCGC	0.000552383
kmer_CATGG	0.000551752
kmer_TTTG	0.000551072
kmer_GCGCG	0.000550725
kmer_GCTGG	0.000550363
kmer_CCGCGG	0.000549669
kmer_GGAGG	0.000549468
kmer_GGCGGG	0.00054939
kmer_CCGCT	0.000548175
kmer_CCCCGC	0.000545327
kmer_GGGCCT	0.000543767
kmer_CAAG	0.000543753
kmer_GGGCGG	0.000542623
kmer_AGCCCG	0.000540781
kmer_GATGG	0.000537334
kmer_TTGT	0.000536776
kmer_GCCTGG	0.000536236
kmer_TGTT	0.000535495
kmer_CGGAG	0.00053414
kmer_GACG	0.000534118
kmer_GCTA	0.000531155
kmer_ACCA	0.000529514
kmer_TGCCCC	0.000527967
kmer_TTCG	0.000527508
kmer_GTGT	0.000526755
kmer_TGGAG	0.000525583
kmer_GAAT	0.000525323
kmer_GATGC	0.000525177
kmer_GAGCG	0.000525174
kmer_ATA	0.000524531
kmer_CGGCT	0.000524506
kmer_TCCCC	0.000521861
kmer_GTGGC	0.000520999
kmer_TGGCC	0.000520704
kmer_GCCAT	0.000520553
kmer_GCCCGA	0.000520383
kmer_CCATGC	0.000520302
kmer_CGAC	0.000517007
kmer_CAAA	0.000515356
kmer_CTGAG	0.000515241
kmer_CCAA	0.000514572
kmer_GGGGCG	0.000514568
kmer_TTGGAT	0.000513649
kmer_ATGCC	0.000512303
kmer_AAAC	0.000511499
kmer_AGCCCC	0.000510695
kmer_CTAC	0.000509611
kmer_AGGAG	0.000507096
kmer_GGTGG	0.000506533
kmer_CTTT	0.000505331
kmer_GCAT	0.000504246
kmer_GGCTC	0.000503509
kmer_CTCGG	0.000503368
kmer_GGCCCA	0.000501429
kmer_TAT	0.000497406
kmer_CCCAC	0.000496439
kmer_GCAA	0.000496308
kmer_TCGT	0.000494936
kmer_GAGGCC	0.000493077
kmer_CCTGC	0.000492999
kmer_GGGCA	0.000492654
kmer_AGGGC	0.000492611
kmer_CCGCCC	0.000490022
kmer_CCGT	0.000487795
kmer_TGCTG	0.000485802
kmer_CCTCCC	0.000485576
kmer_CTGCG	0.000484571
kmer_GAGCT	0.000484439
kmer_GCCAG	0.000484023
kmer_CCCAGG	0.000483653
kmer_CAGGA	0.000481493
kmer_TCCTC	0.000481028
kmer_GCCAC	0.000478109
kmer_CGGCCG	0.000476812
kmer_AGCGG	0.000476148
kmer_TCCCG	0.000476087
kmer_GTGGG	0.000476016
kmer_CCAGC	0.000475969
kmer_CGGCGG	0.000475794
kmer_TTCA	0.00047557
kmer_CAGCG	0.000475153
kmer_GCCTCC	0.000474076
kmer_CAAC	0.000473601
kmer_CCGAGC	0.000472567
kmer_GCGGCG	0.000471781
kmer_CGAGC	0.000470555
kmer_CAGTG	0.000470309
kmer_GGGAT	0.000469389
kmer_GAGGG	0.000468656
kmer_ATCC	0.00046794
kmer_GTCA	0.000467119
kmer_CCATGG	0.00046693
kmer_AGCCT	0.000466923
kmer_CTCCT	0.000465383
kmer_CACG	0.000465278
kmer_CATC	0.00046523
kmer_GGCCAT	0.000465018
kmer_CACA	0.000464879
kmer_GCCGCG	0.000464629
kmer_ACCCC	0.000463819
kmer_CCCCT	0.000463465
kmer_ACGC	0.000463138
kmer_TTGA	0.000462699
kmer_GCAGCC	0.0004618
kmer_GGCGCG	0.000459886
kmer_CGCGGC	0.000459196
kmer_CTAG	0.000458302
kmer_AGGCCC	0.000457916
kmer_CCTA	0.000456518
kmer_GAGGA	0.000455128
kmer_AACT	0.00045375
kmer_CCCAGC	0.000452265
kmer_AGCCA	0.000451642
kmer_TCCGC	0.00045028
kmer_CGTT	0.000449326
kmer_CTCCG	0.000449313
kmer_ACGG	0.000447198
kmer_ACCCA	0.000446702
kmer_GGAGA	0.000446053
kmer_GGTCC	0.000445785
kmer_GGCAG	0.000444236
kmer_GGGGCT	0.000443163
kmer_CCCCAG	0.000440915
kmer_GACCC	0.000440358
kmer_CGCAG	0.000439633
kmer_CCTGA	0.000438115
kmer_CAGGG	0.000437872
kmer_GGACC	0.000437639
kmer_TCAC	0.000437596
kmer_GCCGGC	0.000436834
kmer_GGGGA	0.000436665
kmer_AGAT	0.000436609
kmer_AACA	0.000436542
kmer_TGGCT	0.000436507
kmer_TGATG	0.000436339
kmer_CGGGA	0.000434734
kmer_GCATG	0.000433782
kmer_CCCTC	0.000433147
codon_Y	0.000432237
kmer_TTTTG	0.000432143
kmer_GACCCC	0.000431454
kmer_CCCCCA	0.000429513
kmer_ACAA	0.000429335
kmer_ATGGC	0.000428609
kmer_GCAGG	0.000428344
kmer_AACC	0.00042792
kmer_GGGGGG	0.000427602
kmer_AGGCG	0.000425906
kmer_CCTTC	0.000424571
kmer_GCGGA	0.00042368
kmer_TGCCG	0.000422498
kmer_CACCC	0.000422325
kmer_CTGTG	0.000420965
kmer_AGGTT	0.000420731
kmer_CGGGAT	0.000420193
kmer_GATC	0.000416918
kmer_CTGCCC	0.000416742
kmer_ATGCG	0.000415018
kmer_GGCCAG	0.00041427
kmer_AGGGG	0.000412183
kmer_GGGCTG	0.000411835
kmer_ACTT	0.00041118
kmer_GGGTG	0.000411161
kmer_GAGAG	0.000411006
kmer_TCTCC	0.000410905
kmer_CGAA	0.00041021
kmer_TAGC	0.000409398
kmer_CGCCCC	0.000409256
kmer_TCCCT	0.00040849
kmer_CCGGA	0.000408425
kmer_GGAAG	0.000408207
kmer_GGCATG	0.000407971
kmer_TCGCC	0.000406938
kmer_GCACC	0.000405573
kmer_TTAC	0.00040492
kmer_TGCCT	0.000404264
kmer_CACCT	0.000403504
kmer_TCTGC	0.000403089
kmer_AGCCG	0.000401686
kmer_TTAG	0.000401503
kmer_CAGGT	0.000401235
kmer_TGGAT	0.000400091
kmer_GCGCCC	0.000399316
kmer_CGCCT	0.000399094
kmer_TCCAG	0.000398846
kmer_TGAT	0.000398055
kmer_CTGGA	0.000397047
kmer_GTAG	0.000396654
kmer_CTGCA	0.000396611
kmer_GGGGT	0.000396471
kmer_ACCTG	0.000396461
kmer_CCAAG	0.000394647
kmer_GCGCA	0.000393828
kmer_GATT	0.000393633
kmer_TGGCG	0.000393539
kmer_AGCTG	0.000393376
kmer_GCGCT	0.000393123
kmer_AAAA	0.000392792
kmer_GGCCGC	0.000392506
kmer_TTGGA	0.000392153
kmer_TGGAGG	0.000391784
kmer_CAGCA	0.000391352
kmer_CCACC	0.000391321
kmer_CTCTC	0.000388987
kmer_TGCAG	0.000388507
kmer_CGCTG	0.000388091
kmer_TGGAC	0.000387986
kmer_GCCCGC	0.000387643
kmer_ACAC	0.000386982
kmer_AGAGG	0.000386762
kmer_CCCTGG	0.000386691
kmer_GCTGA	0.00038627
kmer_CTTGG	0.000384356
kmer_TCAT	0.000384174
kmer_ATGAA	0.000382727
kmer_AGGCA	0.000382542
kmer_CCCGCC	0.000381847
kmer_CAGAG	0.000381679
kmer_TAGG	0.000381302
kmer_AGCAG	0.000380881
kmer_CTGCGG	0.000379314
kmer_CTTCC	0.00037899
kmer_AATGA	0.000376668
kmer_AAGT	0.000376476
kmer_TAAA	0.000376199
kmer_GGGAC	0.000374067
kmer_AGCGC	0.000373757
kmer_GAAGC	0.000372267
kmer_GTGGA	0.000372121
kmer_AAAT	0.000372091
kmer_GGAGCC	0.000370902
kmer_GGCTGC	0.000370394
kmer_CTCTG	0.000370372
kmer_TGCCA	0.00036977
kmer_CCGCCA	0.000369444
kmer_CTGCT	0.000368986
kmer_AATC	0.000367379
kmer_TACC	0.000366949
kmer_CCTGGC	0.000366923
kmer_GAAGA	0.000366293
kmer_GTCCC	0.000366199
kmer_TTCCC	0.000364467
kmer_GACTG	0.000363825
kmer_CCGGAG	0.000362897
kmer_ATTC	0.000362399
kmer_CTAGCC	0.000361798
kmer_GCTGCC	0.000361766
kmer_CCTCG	0.000361694
kmer_TCGGG	0.000360637
kmer_CATT	0.000360595
kmer_AAGCC	0.000360106
kmer_TCCTG	0.000359461
kmer_CAGCT	0.000359316
kmer_ATCA	0.000357898
kmer_CATGA	0.000357888
kmer_CCCGCG	0.000357586
kmer_CCAGA	0.000356837
kmer_AGTGG	0.000356693
kmer_GGCGA	0.000355534
kmer_CACAG	0.000355033
kmer_CCCTT	0.000354272
kmer_TGAAG	0.000353968
kmer_CGAGG	0.000353817
kmer_CGGTG	0.000353454
kmer_CGAT	0.000351834
kmer_CCCCAC	0.000351547
kmer_CCGCGC	0.000350785
kmer_TACT	0.000349018
kmer_GCTCT	0.000348085
kmer_GAGGT	0.000347832
kmer_TGAGG	0.0003477
kmer_CCACCC	0.000347697
kmer_TATG	0.000347276
kmer_CCTCT	0.000346951
kmer_CTCCA	0.000346564
kmer_GCGCGG	0.000346431
kmer_TGGGA	0.000346279
kmer_GGCAC	0.000345718
kmer_TCTGG	0.000345102
kmer_ACCCAG	0.000344774
kmer_ACAT	0.000344642
kmer_CTGCTG	0.000343911
kmer_TGGGCC	0.00034365
kmer_TCTTCA	0.000343506
kmer_ATGGAG	0.000343374
kmer_TCCGG	0.000342746
kmer_GGGAA	0.000342682
kmer_TTTCC	0.000342663
kmer_TGTGG	0.000342332
kmer_GACCT	0.000341508
kmer_CCCTGA	0.000340376
kmer_TGAGCC	0.000339143
kmer_CTCAG	0.000338146
kmer_GAACT	0.000337981
kmer_CTCGC	0.000337894
kmer_CCGGCG	0.000337032
kmer_TCAGG	0.000336324
kmer_GAGAA	0.00033559
kmer_GGTCCC	0.000335499
kmer_GTGCC	0.000334934
kmer_CCTCAG	0.000333259
kmer_ACCCCG	0.000333165
kmer_GATGA	0.000332099
kmer_TCAA	0.000331569
kmer_AGAAG	0.000330683
kmer_GTCTG	0.000330476
kmer_GATGT	0.000330188
kmer_AGGGA	0.000329674
kmer_AGACC	0.000329406
kmer_GTCCA	0.000328981
kmer_GGGTC	0.000328663
kmer_GCTGGG	0.000328285
kmer_TCCATG	0.000327933
kmer_AGCCTC	0.000327839
kmer_ATGCT	0.000327198
kmer_CGCTC	0.000327135
kmer_ACCCT	0.000327111
kmer_GAAGG	0.000325985
kmer_CAGACC	0.000325695
kmer_ATCT	0.000325142
kmer_GCCGA	0.000324807
kmer_CGGGT	0.000324404
kmer_ACAGA	0.000324363
kmer_CAGCCC	0.000323277
kmer_CTTCA	0.000323093
kmer_GCGAG	0.000322737
kmer_TTGGG	0.000321721
kmer_ATCAA	0.000320767
kmer_GCCTT	0.000320507
kmer_GGGGAG	0.000319796
kmer_CTAA	0.00031977
kmer_TGGAA	0.000319724
kmer_GGTGA	0.000319551
kmer_CTGGT	0.000319515
kmer_AGGTG	0.000318761
kmer_ATAAA	0.000318668
kmer_CAGGAC	0.00031805
kmer_CCCTGC	0.000317641
kmer_GCCCAG	0.000315596
kmer_GTCCCC	0.00031495
kmer_CTCTT	0.000314908
kmer_GTTA	0.000314112
kmer_TCGGC	0.000313277
kmer_CAAT	0.000312599
kmer_GAATG	0.000311595
kmer_CGCCTC	0.000310961
kmer_GATCAA	0.000310933
kmer_CAGCCA	0.000310892
kmer_GATTT	0.000310157
kmer_CCTGT	0.000309938
kmer_ATGAGG	0.000309111
kmer_CTCCCC	0.00030901
kmer_CTGAC	0.000308111
kmer_AGGCT	0.000307477
kmer_AAGGA	0.000306439
kmer_CTTA	0.000305683
kmer_GGAAA	0.000305521
kmer_TGCCAC	0.000305052
kmer_GGACT	0.000305013
kmer_CAAGG	0.000304915
kmer_AATT	0.000304851
kmer_GCCGCT	0.000304811
kmer_GGAGT	0.000304678
kmer_TCCAT	0.000304578
kmer_ATGCGG	0.000303855
kmer_GGGAGG	0.00030308
kmer_GAATGA	0.000302937
kmer_GTCCG	0.000302859
kmer_GCAGA	0.000302408
kmer_CCCAAG	0.000301617
kmer_GGCTCC	0.00030143
kmer_CGTCC	0.000301398
kmer_GGCTGG	0.000301393
kmer_ACTGC	0.000300677
kmer_GCTGT	0.000300632
kmer_TTCTCC	0.000300559
kmer_TCTGAG	0.000300108
kmer_GGGAGC	0.000300011
kmer_AGAGA	0.00029948
kmer_GGACA	0.000299099
kmer_CGGCCA	0.000298767
kmer_GCGTC	0.00029806
kmer_CGCCCG	0.000297803
kmer_AGTA	0.000297034
kmer_CCCCGA	0.000295367
kmer_GTAA	0.000294836
kmer_TCAAG	0.000294552
kmer_GCCCTG	0.000294213
kmer_AACG	0.000293868
kmer_ATTG	0.000293393
kmer_CAGGCC	0.000292569
kmer_CTGGCC	0.000292542
kmer_AATGG	0.000292145
kmer_ACCGC	0.000292018
kmer_AGAGC	0.000291863
kmer_CGCCGG	0.00029142
kmer_ATGCCC	0.00029114
kmer_ATGGCC	0.000290691
kmer_TCAGC	0.000290156
kmer_TCTTC	0.000289997
kmer_TTTCA	0.000289749
kmer_GAGGGG	0.000289443
kmer_TGGGGT	0.000289363
kmer_CTCCTC	0.000288984
kmer_TGGTG	0.000288674
kmer_TTAA	0.000288656
kmer_AGCTC	0.000288034
kmer_GGGTT	0.000288004
kmer_CCGCA	0.000287815
kmer_TGTTT	0.0002877
kmer_CTTCT	0.00028699
kmer_TTCCT	0.000286453
kmer_GGAGGC	0.000285898
kmer_CATTTT	0.000285083
kmer_CGCAC	0.000284808
kmer_CGAGCC	0.000284799
kmer_TGTA	0.000284782
kmer_CCAGTG	0.000283464
kmer_GACTC	0.000283015
kmer_GACAG	0.000283015
kmer_TCTA	0.000282792
kmer_TGCGC	0.000282436
kmer_CTCCTG	0.000282413
kmer_GAGGCG	0.000281853
kmer_ATTTTC	0.000281581
kmer_GCTTC	0.000281421
kmer_CTGTC	0.000281186
kmer_CCTGCC	0.000281126
kmer_CGCGA	0.000281082
kmer_TCTTG	0.000281047
kmer_CCAGCC	0.000280696
kmer_GTCGG	0.000280528
kmer_AAGAG	0.000280494
kmer_AGATG	0.000279892
kmer_TGTCT	0.000279654
kmer_GCAGT	0.000279413
kmer_CCACT	0.000279144
kmer_GGTTC	0.000279046
kmer_TGTCC	0.000279009
kmer_GCGCGC	0.000278942
kmer_CAGGCT	0.000277747
kmer_CATGGG	0.000277248
kmer_CCCACC	0.000277029
kmer_CCCTCC	0.000277015
kmer_AACCC	0.000277004
kmer_GCCAGG	0.000276737
kmer_GTGAG	0.000275881
kmer_TCCCA	0.000275388
kmer_TCCTGG	0.000275385
kmer_ACGA	0.000275127
kmer_ACAGG	0.00027469
kmer_AGGGGC	0.000273979
kmer_GGTGC	0.000273258
kmer_ACAGC	0.000273051
kmer_TTCCG	0.000273042
kmer_GGGCAG	0.000273038
kmer_GCCTCA	0.000273017
kmer_CGTCT	0.00027288
kmer_CATGGA	0.000272594
kmer_GAGCA	0.000272553
kmer_TTAT	0.000272468
kmer_TATT	0.000271413
kmer_TGGCGG	0.000271303
kmer_CGGAGC	0.000270989
kmer_GATA	0.000270534
kmer_ACGCC	0.000270358
kmer_GGTA	0.000270207
kmer_GATGGG	0.000270185
kmer_GAGGAG	0.00027013
kmer_TCTCG	0.000269474
kmer_TTTTC	0.000269126
kmer_GCGCTG	0.000268893
kmer_CGGCA	0.000268743
kmer_CCCCTG	0.000268726
kmer_GGCAA	0.000268311
kmer_GCTCG	0.000268216
kmer_CGTCG	0.000267398
kmer_GAGCCG	0.000267274
kmer_GCGGGA	0.000267127
kmer_AGAGT	0.00026689
kmer_CAGGCA	0.000265637
kmer_GGAGGA	0.000265343
kmer_TGGGGG	0.000265256
kmer_CATGAG	0.000264986
kmer_CTCCGC	0.000264968
kmer_GTGGT	0.000264643
kmer_CAGAC	0.000264623
kmer_TAAT	0.000264383
kmer_TAAG	0.000264167
kmer_ATGGGC	0.000263987
kmer_ACCTC	0.000263896
kmer_TGAAC	0.000262738
kmer_CCCCCC	0.000262684
kmer_GCGGT	0.000262676
kmer_CCGGCT	0.000262459
kmer_GTGCT	0.000262103
kmer_GTCGC	0.000261849
kmer_CTCTCC	0.000261775
kmer_TTCTG	0.000261268
kmer_CCTTG	0.000260379
kmer_TTTA	0.000260278
kmer_AAGGG	0.000259834
kmer_TAGA	0.000259583
kmer_TCCTT	0.000259425
kmer_CGCTGC	0.000259028
kmer_ATTA	0.000258803
kmer_GGGGGA	0.000258491
kmer_GGTGGC	0.000258312
kmer_CACTG	0.000258107
kmer_TCTCT	0.000257518
kmer_CGACC	0.000257265
kmer_AAGGC	0.000257244
kmer_GACGC	0.000257033
kmer_AGGCGG	0.000256914
kmer_GGCTT	0.000256811
kmer_GTTCC	0.0002567
kmer_CCTCTC	0.000256505
kmer_GAAAG	0.00025615
kmer_TGAGA	0.000256055
kmer_CGCGCC	0.000255544
kmer_ACCCTG	0.000255519
kmer_CCAGT	0.000255474
kmer_TTTGC	0.000255406
kmer_GGACG	0.000254817
kmer_TAGT	0.00025416
kmer_GTTTG	0.000254011
kmer_TCGA	0.000253754
kmer_TGGTGG	0.000253264
kmer_CTGAGC	0.000252899
kmer_TCCCGG	0.000252726
kmer_GACGCA	0.00025258
kmer_AGCAGC	0.000251703
kmer_GAGGGC	0.000251411
kmer_CAGCCT	0.000251367
kmer_ACGT	0.000251354
kmer_CGGCTC	0.000251088
kmer_TCAGT	0.00025088
kmer_GGCAGC	0.000250769
kmer_TCCCCC	0.000250386
kmer_GTAT	0.000250356
kmer_GTGCG	0.000250187
kmer_AGCTT	0.000250041
kmer_CCGAA	0.000249944
kmer_GAGAC	0.000249801
kmer_CACGC	0.000249723
kmer_TTGGC	0.000249562
kmer_CTTTG	0.000248292
kmer_CTAGC	0.0002482
kmer_GAGTG	0.00024803
kmer_TGCGGG	0.000247993
kmer_ATCAAG	0.000247858
kmer_AGGCCG	0.000247804
kmer_ACTA	0.000247706
kmer_AAAGC	0.000247354
kmer_TGAGCG	0.000247015
kmer_CTTGC	0.000246652
kmer_CCAGGT	0.000246378
kmer_AGTGC	0.000245993
kmer_CTTTC	0.000245629
kmer_GGTGT	0.000245606
kmer_TTCCA	0.000245184
kmer_CCGTC	0.000245107
kmer_CGGAA	0.000245052
kmer_AGCGGC	0.000244673
kmer_CGTGG	0.000244365
kmer_GAAAA	0.0002443
kmer_AGGAA	0.000244276
kmer_GGAAC	0.00024327
kmer_AGCGCC	0.000243078
kmer_AGGCTC	0.000242987
kmer_TCTGA	0.000242978
kmer_GCTTT	0.000242174
kmer_GGATGA	0.000241575
kmer_AGAAA	0.000241496
kmer_TGGGGC	0.000241132
kmer_TGGCA	0.000240987
kmer_TCCGCG	0.000240179
kmer_CTGCCT	0.000239633
kmer_ACTGG	0.00023876
kmer_CGGAC	0.000238418
kmer_CAAGC	0.000237861
kmer_GCAGCG	0.000237713
kmer_GAAGT	0.0002376
kmer_TTTCT	0.000237458
kmer_CACCG	0.000237331
kmer_GCCCCT	0.00023717
kmer_CCGCTG	0.000237156
kmer_GCTCCC	0.000237053
kmer_GGGTCC	0.000236905
kmer_GGCCCT	0.000236853
kmer_GCCGT	0.000236638
kmer_CCCATG	0.000236601
kmer_AATA	0.000236272
kmer_CAGAGG	0.00023535
kmer_TCCTTA	0.000234792
kmer_CTTCG	0.00023477
kmer_AGGTGG	0.000234538
kmer_GAGCAG	0.000234462
kmer_CTGGGC	0.000234301
kmer_ATCG	0.000234215
kmer_CCCGT	0.000233985
kmer_CCATGA	0.000233869
kmer_ATAT	0.000233815
kmer_CCTGGA	0.000233682
kmer_CCACA	0.000233425
kmer_TGTGA	0.000233209
kmer_TGGGT	0.000232754
kmer_CAAAG	0.000232524
kmer_ATAA	0.000232471
kmer_AGTTC	0.000232032
kmer_TCCCAG	0.000232007
kmer_GGTGCC	0.000231987
kmer_GGGGTG	0.000231754
kmer_TCTAC	0.000230598
kmer_GTTCT	0.000230157
kmer_TGCTC	0.000229655
kmer_CCAGGA	0.00022943
kmer_CCGAC	0.000229313
kmer_CTCGGG	0.000229138
kmer_ACTGA	0.00022864
kmer_CTGTGA	0.000228553
kmer_CACTC	0.000228523
kmer_CAGTGC	0.000228269
kmer_CCGTG	0.000227501
kmer_CTCCCG	0.000227234
kmer_GGCAT	0.000227145
kmer_CGCGCG	0.000226949
kmer_GAGTA	0.000226609
kmer_CAGAA	0.000226553
kmer_AGGAGC	0.000226504
kmer_AGCCAG	0.000226297
kmer_GGAGGG	0.000226282
kmer_CATGCG	0.000225929
kmer_GTGGCC	0.000225878
kmer_TCTTT	0.000225755
kmer_TGCCTC	0.000225748
kmer_GTCCAC	0.000225541
kmer_CACTT	0.000225005
kmer_TCTGT	0.000224655
kmer_CCCAA	0.000224502
kmer_CCGGT	0.000224311
kmer_TGTTG	0.000223893
kmer_GTGGGC	0.000223863
kmer_CCTTT	0.000223838
kmer_CGCTCC	0.00022367
kmer_CCTCCT	0.000223182
kmer_GACAC	0.000223166
kmer_GTGTG	0.000223127
kmer_GCGGCT	0.000223017
kmer_TGTGC	0.000222916
kmer_GCGAC	0.000222903
kmer_GCGTG	0.00022281
kmer_TTGGAC	0.000222794
kmer_TGGGCG	0.000222572
kmer_AGCTGG	0.000222124
kmer_ATTTG	0.000222082
kmer_TATC	0.000221225
kmer_TTGAA	0.0002212
kmer_ACCCG	0.000220787
kmer_ACCTGG	0.000220757
kmer_CACCTG	0.000220703
kmer_AAATG	0.000220657
kmer_GGGCCA	0.00022056
kmer_CATGT	0.000220401
kmer_GCTGCG	0.000220359
kmer_CTGCAG	0.00021993
kmer_ATGAAC	0.000219691
kmer_CATTT	0.00021949
kmer_TATGCC	0.000219122
kmer_CTTTT	0.000218932
kmer_AGAAT	0.000218931
kmer_CCTAG	0.000218676
kmer_GAGTC	0.000218518
kmer_CCGAGG	0.000218172
kmer_TGGCTG	0.000218143
kmer_ACTCC	0.000217691
kmer_GTTCCC	0.000217644
kmer_TCACC	0.00021747
kmer_GCGGAG	0.000217405
kmer_AGCCGC	0.000217033
kmer_CCACTG	0.000216905
kmer_GTCTC	0.000216766
kmer_GTTGG	0.000216747
kmer_AGGCCA	0.000216375
kmer_ATTTC	0.000216056
kmer_GCACG	0.000215773
kmer_ACGGC	0.000215675
kmer_CGGAGG	0.000215479
kmer_GTAC	0.000215426
kmer_CTCGGC	0.000215237
kmer_TCGCT	0.000215068
kmer_AGGACC	0.000214636
kmer_AGCAGG	0.000214538
kmer_GGAGCG	0.000214362
kmer_TCCCTC	0.000214049
kmer_GAAGCC	0.000214028
kmer_TAAC	0.000213983
kmer_TTCTT	0.000213938
kmer_GAACC	0.00021385
kmer_GAGTT	0.000213844
kmer_AGTGA	0.000213834
kmer_GGGGCA	0.000213668
kmer_GTGAA	0.000213501
kmer_AATGC	0.000213416
kmer_TCCGCC	0.000213326
kmer_GACCCT	0.000213015
kmer_GTCAG	0.000212371
kmer_GGCGT	0.000212222
kmer_TTTGG	0.000211967
kmer_GTGTT	0.000211891
kmer_CATCT	0.000211792
kmer_TCGCCG	0.000211561
kmer_TGAAA	0.000211522
kmer_AGCCTG	0.000211207
kmer_CACCA	0.000211057
kmer_ACTTG	0.000210779
kmer_AGAGGA	0.000210776
kmer_GTGTC	0.000210613
kmer_CAAGA	0.000210401
kmer_TGCGGC	0.000210096
kmer_GACAA	0.000210019
kmer_AGACA	0.000209771
kmer_CCGACC	0.000209712
kmer_CTGGAA	0.000209283
kmer_CAACAG	0.000209219
kmer_ACAGT	0.000209191
kmer_AGCGA	0.000209145
kmer_CGACA	0.000208813
kmer_ATAG	0.000208798
kmer_GGGACC	0.000208474
kmer_AAGCG	0.00020843
kmer_GGTCG	0.000208283
kmer_AAGCA	0.000208175
kmer_TGACC	0.000207945
kmer_AAAGG	0.000207733
kmer_TCCAGC	0.000207563
kmer_TGGTT	0.000207206
kmer_TACA	0.000207149
kmer_AACTG	0.000207078
kmer_GCTCCT	0.00020706
kmer_ACAGTG	0.000206869
kmer_ATGGAC	0.00020666
kmer_GCCGAG	0.000206443
kmer_CCCTCG	0.000206376
kmer_AGTCG	0.000206368
kmer_GAGCGC	0.000206342
kmer_TAGCC	0.000206339
kmer_CTGCGC	0.000206294
kmer_GGAAAC	0.000206107
kmer_ACCGG	0.000206059
kmer_CTCCCT	0.000205933
kmer_TTGCT	0.000205541
kmer_GACGG	0.000205534
kmer_TGATGC	0.000204981
kmer_GAAAC	0.000204957
kmer_CCGCCT	0.000204775
kmer_AAGAA	0.00020444
kmer_GATGTG	0.000203756
kmer_AGAAGC	0.000203676
kmer_CATAG	0.000202989
kmer_CAGAGC	0.000202982
kmer_CCAGGG	0.000202865
kmer_GCCCTC	0.00020281
kmer_CATA	0.000202687
kmer_ATCCC	0.000202561
kmer_CCCAT	0.00020247
kmer_TCAGA	0.000202342
kmer_CAGTC	0.00020224
kmer_GAGAAT	0.000202174
kmer_GACCA	0.000202147
kmer_GAAGAG	0.00020214
kmer_TCTCGG	0.00020183
kmer_GGCCTC	0.000201294
kmer_GCTCA	0.000201277
kmer_TGAGGC	0.000200859
kmer_GCCCAT	0.00020065
kmer_CTAT	0.000200384
kmer_CGACCC	0.000200282
kmer_TGAAGC	0.000200238
kmer_GTGAC	0.0002
kmer_CCTCCG	0.000199783
kmer_GGACCC	0.000199395
kmer_GCCTCT	0.000199286
kmer_GATGCC	0.00019902
kmer_ACGCA	0.000198776
kmer_TCGCG	0.000198644
kmer_AGGAGG	0.000198406
kmer_TCCCCG	0.000198013
kmer_TGCAGC	0.000198002
kmer_GGCACC	0.000197844
kmer_GAGGAC	0.000197519
kmer_GGTCT	0.000197371
kmer_AAGCCC	0.000197336
kmer_GGGAAG	0.000197192
kmer_TGAGCT	0.000197119
kmer_GCAGGG	0.00019673
kmer_GCAGCT	0.000196718
kmer_CACGG	0.000196524
kmer_TTTTT	0.000196502
kmer_ATCCT	0.000196463
kmer_GCGCCT	0.000196276
kmer_TGGAGA	0.000196251
kmer_AGTCC	0.000196192
kmer_CTGGCT	0.000195965
kmer_CTCCAG	0.00019574
kmer_GCCAA	0.000195533
kmer_GCGCAG	0.000195498
kmer_CTGAA	0.000195091
kmer_GCCTGC	0.000194982
kmer_CTGAT	0.000194631
kmer_CTCTGC	0.000194519
kmer_ACCAG	0.000194373
kmer_CCCAGA	0.000194311
kmer_TCTGCT	0.000194263
kmer_TCCTCC	0.00019414
kmer_TGGGAG	0.000193978
kmer_GGAGAG	0.000193969
kmer_CTCCAT	0.000193873
kmer_GGCGGA	0.000193832
kmer_CAGCGC	0.000193739
kmer_CTCATG	0.0001936
kmer_GGTCCA	0.000193516
kmer_GCTGCT	0.000193498
kmer_CTGTT	0.000193313
kmer_TCTCA	0.000193034
kmer_GTAGG	0.000192957
kmer_GGCGCA	0.000192684
kmer_GGGTTC	0.00019262
kmer_CCCCCT	0.000192471
kmer_AATGAG	0.000192424
kmer_GCAGGT	0.00019235
kmer_GGGAGA	0.000192233
kmer_GCTCCG	0.00019219
kmer_GCAGCA	0.000191895
kmer_CAGTT	0.000191404
kmer_CCTTA	0.000191117
kmer_GGGTGG	0.000190995
kmer_AGGTC	0.000190929
kmer_CGTTC	0.000190882
kmer_TCCCTG	0.000190654
kmer_CACCTC	0.000190628
kmer_CACCCC	0.000190577
kmer_AGGCAT	0.000190387
kmer_CCGCTC	0.000190348
kmer_CGGGAG	0.000190314
kmer_GAGGTG	0.000190305
kmer_CGCCAT	0.00019024
kmer_CCACAG	0.000190055
kmer_GGTTT	0.000190023
kmer_CGTA	0.000190011
kmer_CCCTTC	0.000189925
kmer_GCTCTC	0.000189852
kmer_GTCCT	0.000189771
kmer_CGAGA	0.000189733
kmer_AAGGT	0.00018966
kmer_TCCAC	0.000189613
kmer_CGCTT	0.00018956
kmer_CGAGGC	0.00018948
kmer_GTCAGG	0.000189474
kmer_AAAAG	0.000189355
kmer_AGACCC	0.000189166
kmer_GATCC	0.000189104
kmer_AAAGA	0.000189058
kmer_GCAAG	0.000188548
kmer_CCTGTA	0.000188477
kmer_TATTT	0.000188468
kmer_GGATGC	0.000188451
kmer_CCGCAG	0.00018838
kmer_TATGC	0.000188275
kmer_TGGTC	0.000188043
kmer_ATGCCT	0.000188002
kmer_CCTCGG	0.000188
kmer_GATGGC	0.000187993
kmer_CTCGCC	0.000187922
kmer_TGGCCG	0.000187876
kmer_GACAGA	0.000187693
kmer_TGGCAG	0.00018766
kmer_GAGCTG	0.000187603
kmer_GTCTT	0.000187553
kmer_CTTGT	0.000187225
kmer_AGCAC	0.000187191
kmer_CAGTGA	0.00018715
kmer_AAGAC	0.000186984
kmer_ATCTA	0.000186795
kmer_AAACA	0.000186787
kmer_TTGCA	0.000186554
kmer_GAGAT	0.000186439
kmer_GACTT	0.000186219
kmer_TGACA	0.000186121
kmer_CAGCCG	0.000186101
kmer_CCCCTC	0.000186017
kmer_TCCAGG	0.000185837
kmer_TTCAG	0.000185806
kmer_GGGCAC	0.000185471
kmer_ACTCT	0.00018538
kmer_ACAAG	0.000185327
kmer_ACCTAG	0.000185192
kmer_TTTGT	0.000185109
kmer_GCCAGC	0.000185002
kmer_CGCGT	0.00018486
kmer_TGATC	0.000184649
kmer_GTCCGG	0.000184334
kmer_ACGGG	0.000183807
kmer_CCTTCT	0.000183765
kmer_CCTTCC	0.000183759
kmer_AAAAC	0.000183629
kmer_TGCTT	0.000183467
kmer_TCGGA	0.000183449
kmer_GACCG	0.000183315
kmer_AAGCTT	0.000182887
kmer_TCGGGC	0.000182883
kmer_GGATC	0.000182725
kmer_CGCAGC	0.00018266
kmer_TTCTTG	0.000182553
kmer_AAGAT	0.000182436
kmer_ACGAG	0.000182236
kmer_AGAGCC	0.000181875
kmer_TGAGT	0.000181473
kmer_ATGGGG	0.00018142
kmer_TTCGG	0.000181397
kmer_CCTGAG	0.000181391
kmer_GGGCTC	0.000180972
kmer_CGATG	0.00018048
kmer_CACAGA	0.000180444
kmer_AGAGCT	0.000180235
kmer_CCCGAC	0.000180024
kmer_CAAGT	0.000179936
kmer_TTACC	0.000179935
kmer_ACACC	0.000179906
kmer_AAACC	0.000179876
kmer_TGTGGC	0.00017973
kmer_AACCT	0.000179654
kmer_ACCTCC	0.000179643
kmer_CTCAC	0.000179375
kmer_TGGAGC	0.000179272
kmer_TCATG	0.000179139
kmer_CCGGCA	0.000179132
kmer_TCCTCG	0.000179073
kmer_GTTTC	0.000178974
kmer_GAGAAG	0.000178951
kmer_ATGCTC	0.000178767
kmer_AATGAA	0.000178691
kmer_GAAGCT	0.000178678
kmer_CAGGTG	0.000178647
kmer_CCACCT	0.000178458
kmer_CCACG	0.000178385
kmer_GAATT	0.000178322
kmer_AGGGT	0.000178106
kmer_GCTTG	0.000178011
kmer_TACCC	0.000177801
kmer_GGAAT	0.000177303
kmer_GCCTCG	0.000177199
kmer_GCTCGG	0.000176965
kmer_AGGGCC	0.000176841
kmer_CAGTGG	0.000176837
kmer_CTCCGG	0.000176664
kmer_CGGCTG	0.000176587
kmer_TTGTG	0.000176499
kmer_GTGGCA	0.000176409
kmer_CTGGGA	0.000176202
kmer_GGAGGT	0.000176184
kmer_CAGCAG	0.000176164
kmer_AAGCCT	0.000176103
kmer_TTTGA	0.000175925
kmer_TTGGGG	0.000175628
kmer_CCGGGT	0.000175541
kmer_TTGTT	0.000175515
kmer_CAATGT	0.000175248
kmer_CTGGCG	0.000175178
kmer_TACG	0.000175144
kmer_TCACA	0.000175122
kmer_CACCCA	0.000174825
kmer_CCGGGA	0.00017478
kmer_AGCCAC	0.00017476
kmer_CGGTC	0.000174709
kmer_CCAGCA	0.000174352
kmer_TGCAT	0.000174318
kmer_TGCCCA	0.000174255
kmer_CACCCT	0.000174238
kmer_CCTGCG	0.000174118
kmer_ACCAC	0.000174072
kmer_GGTCGC	0.000174072
kmer_TCTCCT	0.000173886
kmer_ATTTTT	0.000173871
kmer_ATCTC	0.000173795
kmer_CAGAT	0.000173571
kmer_ATGCTG	0.000173428
kmer_GGAGCT	0.000173412
kmer_AACAT	0.000173282
kmer_AGGAT	0.00017327
kmer_CCCGGA	0.000173156
kmer_GCCGGA	0.000173148
kmer_ATGGCT	0.000173072
kmer_GACTGC	0.00017208
kmer_GTGGCT	0.000172009
kmer_GGACCT	0.000171843
kmer_CATCC	0.000171746
kmer_ATGTC	0.000171589
kmer_ATGTT	0.000171373
kmer_CCACCG	0.00017134
kmer_CTTGA	0.000171262
kmer_AGCTCT	0.000171239
kmer_GGTTG	0.000171195
kmer_CGGCCT	0.00017108
kmer_CTGTGG	0.000170925
kmer_GAGAGG	0.000170778
kmer_GGCAGG	0.000170744
kmer_ACCCGG	0.000170658
kmer_GGTAG	0.000170492
kmer_CCTGTC	0.000170468
kmer_AGAACT	0.000170427
kmer_GAGCGG	0.000170073
kmer_TGCAA	0.00016983
kmer_GCTGTG	0.000169801
kmer_GATGAG	0.000169726
kmer_TGGCTC	0.000169446
kmer_GATTTT	0.000169391
kmer_TGCCCT	0.000169334
kmer_CACAC	0.000169244
kmer_CCAAGG	0.000168764
kmer_TCACCT	0.000168757
kmer_AAGTT	0.000168735
kmer_TTGAGT	0.000168387
kmer_TTGCC	0.000168363
kmer_GCTGGC	0.000168206
kmer_GTGGAC	0.000167836
kmer_TGACT	0.000167803
kmer_TGGATG	0.000167789
kmer_TGCTGG	0.000167677
kmer_ACCCCC	0.000167367
kmer_CTGGAG	0.000167169
kmer_TGATTT	0.000166906
kmer_ATTCT	0.000166701
kmer_TGGGCT	0.000166465
kmer_AGGCAG	0.000166455
kmer_GGATGG	0.000166428
kmer_CATGGC	0.000166338
kmer_TCCGGG	0.000166331
kmer_CAGGAG	0.000166208
kmer_CTTGGA	0.000166164
kmer_TCCTGC	0.000166023
kmer_CGAAG	0.000165967
kmer_TGCAC	0.00016573
kmer_ACATG	0.000165714
kmer_TTGAG	0.00016571
kmer_GGCCAC	0.000165648
kmer_GCTGGA	0.000165585
kmer_AGCCGG	0.000165561
kmer_TCTCCC	0.000165507
kmer_TCAACA	0.000165487
kmer_TTCAT	0.000165154
kmer_GATCCA	0.000165095
kmer_AGTCT	0.000164848
kmer_GCACT	0.000164656
kmer_TATA	0.000164388
kmer_AGCGCG	0.000164175
kmer_GACGCC	0.000164148
kmer_GTTTT	0.000164096
kmer_CTCACC	0.000163998
kmer_TTGTAA	0.000163853
kmer_GTCCAG	0.000163846
kmer_GCATCA	0.000163394
kmer_GAGGTT	0.00016327
kmer_ACTGT	0.000163157
kmer_GGCTCG	0.000162869
kmer_GTGGGA	0.000162797
kmer_ATGGCG	0.000162677
kmer_AGGGGG	0.000162536
kmer_AGAAGG	0.000162393
kmer_ATGTGG	0.000162364
kmer_GGATT	0.000162334
kmer_TGACG	0.000162249
kmer_TGGCCA	0.000162081
kmer_GCTCTG	0.00016188
kmer_TCCCCT	0.000161666
kmer_ACAAA	0.000161469
kmer_TACCGT	0.000161294
kmer_GCGAGC	0.000161279
kmer_TCCCGC	0.000161269
kmer_TGCCAG	0.000161092
kmer_ACGCG	0.00016106
kmer_CTGTCC	0.000161018
kmer_CTGAGG	0.000160857
kmer_CAGGTA	0.000160827
kmer_CTCTGA	0.000160755
kmer_ATCTG	0.000160734
kmer_CTCTTC	0.000160673
kmer_TGGAAG	0.000160594
kmer_AGACT	0.000160594
kmer_CAAAA	0.000160568
kmer_GGCGCT	0.000160498
kmer_CTAGTT	0.000160484
kmer_AAGAGA	0.000160404
kmer_AATTT	0.000160268
kmer_GCCCAC	0.000160156
kmer_TCGGT	0.00015995
kmer_GCGCTC	0.000159927
kmer_CGCAGG	0.000159486
kmer_GTGGGG	0.000159458
kmer_GGGTCT	0.000159142
kmer_AAGTG	0.000159123
kmer_ATAC	0.000158761
kmer_GCAAA	0.00015865
kmer_CTGCTC	0.000158497
kmer_CAGGGG	0.000158306
kmer_GAGAGC	0.000158239
kmer_GTGAGG	0.000158122
kmer_CGTTG	0.000158067
kmer_CCTGTG	0.000158026
kmer_AAAAT	0.000157877
kmer_CAATG	0.000157871
kmer_CAGGGC	0.000157863
kmer_AAGACA	0.000157791
kmer_CGCAT	0.000157733
kmer_AGGCGC	0.000157636
kmer_GCAGGA	0.000157581
kmer_TCTTCT	0.00015755
kmer_CCAGAG	0.000157549
kmer_AACAG	0.000157543
kmer_TCAGGA	0.00015741
kmer_CCAACG	0.0001574
kmer_CCAGCT	0.000157292
kmer_TCATC	0.000157218
kmer_GTTCA	0.000156828
kmer_TAGGG	0.000156802
kmer_GGAAGA	0.000156662
kmer_GCAAT	0.000156505
kmer_AAACT	0.000156357
kmer_TGTCTG	0.000156279
kmer_CTTAGT	0.000156062
kmer_GTGCA	0.000156003
kmer_GCCACA	0.000155839
kmer_CACAGG	0.000155596
kmer_AAGCT	0.000155427
kmer_CCTGGT	0.000155353
kmer_TCGGGG	0.000155352
kmer_TGGCGC	0.000155249
kmer_CTCGGT	0.000155219
kmer_AGCGGG	0.000154996
kmer_AGTGT	0.000154949
kmer_TGGAAA	0.000154401
kmer_TTAGC	0.000154259
kmer_GGTGGA	0.000154133
kmer_GGCCGA	0.000154089
kmer_CAGCGG	0.000154005
kmer_TGAACT	0.000153913
kmer_GCCACC	0.000153822
kmer_GCGAT	0.000153791
kmer_TGCCGC	0.00015378
kmer_GCATGG	0.000153776
kmer_GGCAGA	0.000153645
kmer_CGTGC	0.000153525
kmer_TAGCA	0.000153511
kmer_AGCTGC	0.000153496
kmer_TCGTC	0.000153281
kmer_CTGGTG	0.000153115
kmer_TTTCCT	0.00015311
kmer_GAACTG	0.000153089
kmer_TCACT	0.00015305
kmer_CAATGC	0.000152891
kmer_CGGGGT	0.000152868
kmer_GTCCGC	0.000152853
kmer_CGGCGA	0.000152796
kmer_CAACA	0.000152581
kmer_CTCTTT	0.000152503
kmer_TGGATT	0.000152449
kmer_TTCGC	0.000152407
kmer_CCCAGT	0.00015237
kmer_GTTGC	0.00015225
kmer_GGGGAC	0.000152234
kmer_TGATT	0.000152207
kmer_CGGTT	0.000152205
kmer_CTAGG	0.000152148
kmer_TCCTCA	0.000152121
kmer_AACAGT	0.000152014
kmer_AGAGGG	0.000151863
kmer_GATGGA	0.000151856
kmer_CGCCGA	0.000151517
kmer_TCCTCT	0.000151399
kmer_CTCAGC	0.000151369
kmer_GTCTGG	0.000151246
kmer_TAGAG	0.000151217
kmer_CTTCCC	0.00015115
kmer_AGAGAA	0.000151146
kmer_GTTCTC	0.00015099
kmer_GCTCGT	0.000150777
kmer_TCCCCA	0.000150649
kmer_CGGTGC	0.000150516
kmer_CGCTCT	0.000150358
kmer_GATCAG	0.000150339
kmer_CAGCAC	0.000150164
kmer_GAAAT	0.000150096
kmer_GCGGTG	0.000149995
kmer_ACTTT	0.000149865
kmer_CCCCTT	0.0001497
kmer_AATAT	0.000149623
kmer_GGACGC	0.000149438
kmer_AAGGAA	0.000149282
kmer_GCTGAG	0.000149239
kmer_TGTTGG	0.000149136
kmer_AGATGG	0.000149115
kmer_CACTTT	0.0001491
kmer_GCAGAG	0.000149069
kmer_GAGGGA	0.000149063
kmer_CCCACA	0.000148468
kmer_AGCAT	0.000148453
kmer_TGCTGT	0.000148383
kmer_CGGTGG	0.000148305
kmer_AGGGAG	0.000148246
kmer_GCAGGC	0.000147986
kmer_ATGTG	0.000147976
kmer_AGTTG	0.000147954
kmer_TTGTC	0.000147885
kmer_CGCGGA	0.000147766
kmer_CCTCTG	0.000147765
kmer_AGTGCT	0.000147523
kmer_GGTCTC	0.000147447
kmer_CGGGCA	0.000147078
kmer_CCTTGG	0.000147069
kmer_GTCAC	0.000146896
kmer_GGATCC	0.00014674
kmer_TCGAA	0.000146674
kmer_GTGAT	0.000146393
kmer_GTGCCC	0.000146385
kmer_CTGTTA	0.000146384
kmer_AGTTT	0.000146344
kmer_CCGAT	0.000146279
kmer_TATGG	0.000146082
kmer_GCCTGA	0.000146013
kmer_GGCTAG	0.000146007
kmer_GTGCGG	0.000145436
kmer_CTTTGA	0.000145416
kmer_CGCCAG	0.000145412
kmer_ATGCA	0.000145204
kmer_CCAAC	0.000144894
kmer_ATTGG	0.000144827
kmer_GGCTGA	0.00014482
kmer_GGAGAA	0.000144482
kmer_GACAT	0.000144404
kmer_GCACA	0.000144394
kmer_CCTCCA	0.000144388
kmer_GGACGG	0.000144349
kmer_ATGGT	0.000144258
kmer_CGCTGG	0.000144236
kmer_CGCGCT	0.000144228
kmer_GGCGAG	0.000144107
kmer_GTGGCG	0.000143512
kmer_TGCTGC	0.000143507
kmer_AATGGA	0.000143468
kmer_CGAGGG	0.000143396
kmer_TGTGGG	0.000143381
kmer_AGGCCT	0.000143377
kmer_ACACT	0.000143343
kmer_CTGCCA	0.000143335
kmer_CTGAGA	0.000143225
kmer_CTTTA	0.000143168
kmer_CAACC	0.000142548
kmer_AGGCGA	0.00014254
kmer_GAGAGA	0.000142377
kmer_TGTAA	0.000142125
kmer_ATTTTG	0.000142096
kmer_ACAACT	0.000141939
kmer_GATTA	0.000141751
kmer_CGGCAG	0.000141578
kmer_TGCCTG	0.000141469
kmer_TGCGT	0.000141126
kmer_GCCGTG	0.0001411
kmer_ATGTA	0.000141092
kmer_GAGCCA	0.00014105
kmer_GCTGCA	0.000141038
kmer_GCCTTG	0.000140958
kmer_AACTC	0.000140866
kmer_GAACTC	0.000140804
kmer_TTATCT	0.000140586
kmer_CATGCC	0.000140383
kmer_GACCAG	0.000140271
kmer_GCTAC	0.000140081
kmer_ACAGGC	0.00014004
kmer_TTCAA	0.000140024
kmer_CTTTGT	0.00013977
kmer_CGCCTG	0.00013976
kmer_AATTA	0.000139638
kmer_CCGCAC	0.000139435
kmer_CGGGCT	0.000139371
kmer_TTTGGA	0.000139326
kmer_ACACCT	0.000139294
kmer_TTTGAA	0.000139192
kmer_GTTAC	0.00013884
kmer_TACCCA	0.000138773
kmer_GCACGG	0.000138544
kmer_GCGAA	0.000138541
kmer_GTCCCT	0.000138454
kmer_GAGAGT	0.000138449
kmer_CACGGC	0.00013844
kmer_ACAGGA	0.000138362
kmer_CAACCT	0.000138062
kmer_TCCGA	0.000138051
kmer_TCCTTC	0.000138046
kmer_GGACTG	0.000138039
kmer_CAGCTG	0.000138027
kmer_TTGCG	0.000138001
kmer_GTTCG	0.000137734
kmer_CCATC	0.00013773
kmer_CACAGT	0.00013756
kmer_CTACG	0.000137511
kmer_TTGGT	0.00013743
kmer_CATGTT	0.000137392
kmer_GCCTGT	0.000137157
kmer_GTGCCG	0.000137122
kmer_TCCATT	0.000137066
kmer_GTGCCA	0.000137007
kmer_TCGGCC	0.000136992
kmer_CATGTA	0.000136984
kmer_CTTCCA	0.000136949
kmer_TTCTGA	0.000136859
kmer_CTCCCA	0.000136852
kmer_AGGAGA	0.000136568
kmer_CCCAAC	0.000136545
kmer_CTGGGT	0.000136539
kmer_CATTGG	0.000136375
kmer_ACCTTG	0.000136278
kmer_CTCCTT	0.000136256
kmer_GGTGGT	0.000136175
kmer_CTGTA	0.000136052
kmer_TCCTA	0.00013602
kmer_GTTGAT	0.000135918
kmer_TCGTGG	0.000135891
kmer_CGGATG	0.000135795
kmer_CCCTCA	0.000135685
kmer_CCGTA	0.000135641
kmer_AATCT	0.000135381
kmer_CGGGAC	0.000135113
kmer_GTTGA	0.000134995
kmer_ACCTT	0.000134982
kmer_CAGCTC	0.000134958
kmer_CTGACT	0.000134833
kmer_CGACG	0.000134803
kmer_AGCAA	0.00013474
kmer_TGAAT	0.000134682
kmer_CACAT	0.000134632
kmer_GACCCA	0.000134542
kmer_GGTTTC	0.000134511
kmer_AAACAA	0.000134425
kmer_TTCCGC	0.000134412
kmer_AGACAG	0.000134322
kmer_CCAGCG	0.000134309
kmer_GAGCCT	0.000134263
kmer_CGGACT	0.000133924
kmer_TGTTC	0.000133832
kmer_TGGACC	0.000133667
kmer_GCACCT	0.00013362
kmer_TCATT	0.000133499
kmer_TGGGGA	0.000133473
kmer_CCGTGG	0.000133406
kmer_GCCTTC	0.000133344
kmer_ATGAT	0.000133329
kmer_GCTAGC	0.000133215
kmer_GCGTT	0.000133111
kmer_AACAA	0.000132875
kmer_CCCCAA	0.000132679
kmer_GCGGAC	0.000132651
kmer_ATGTTG	0.000132626
kmer_TACAG	0.00013249
kmer_TTCTTC	0.000132386
kmer_ACAGAA	0.000132377
kmer_GTCGAA	0.000132238
kmer_TATGAG	0.000132204
kmer_CTTTGC	0.000132181
kmer_TTCTGC	0.000132114
kmer_CAGTAT	0.000132084
kmer_GTTTCC	0.000132083
kmer_CGTGGG	0.000132061
kmer_AGGGCG	0.000132048
kmer_ACCCTC	0.000131994
kmer_TCAGTT	0.000131667
kmer_CCCACG	0.000131581
kmer_GTTGT	0.000131426
kmer_GAATC	0.000131423
kmer_GATCA	0.00013137
kmer_GATGCT	0.00013126
kmer_AGGACT	0.000131235
kmer_CCGAGA	0.000131196
kmer_TTGAT	0.000131144
kmer_TGTGT	0.000130869
kmer_TTATG	0.000130823
kmer_CTTTCC	0.000130753
kmer_GTGCCT	0.000130655
kmer_TGAGGG	0.000130623
kmer_CTGCCG	0.0001303
kmer_AATGGC	0.000130282
kmer_CAGGTT	0.000130206
kmer_AAGGCC	0.00013015
kmer_GGACCA	0.000129917
kmer_CACAA	0.000129843
kmer_CGGGTC	0.00012968
kmer_GAGCTC	0.000129654
kmer_TGGGAA	0.000129567
kmer_CGAGCG	0.00012949
kmer_AGCCCT	0.000129371
kmer_CCCCGT	0.000129342
kmer_TTTCCA	0.000129335
kmer_CTCGT	0.000129307
kmer_TCTGGA	0.000129069
kmer_TAACC	0.000129066
kmer_CTCAGG	0.000129004
kmer_CTTCTC	0.000128989
kmer_GAAGGA	0.000128731
kmer_CCGTT	0.000128671
kmer_CCGGTG	0.000128623
kmer_TTTCG	0.000128539
kmer_CTTCCT	0.000128517
kmer_TTCACC	0.000128508
kmer_CGTGA	0.000128448
kmer_AGCTCC	0.000128376
kmer_CAGGGA	0.000128267
kmer_TATCCT	0.00012824
kmer_CCTCGT	0.00012822
kmer_AATCC	0.00012819
kmer_GATGCG	0.000128164
kmer_GTCTGC	0.000128159
kmer_TAACT	0.00012798
kmer_TGCCCG	0.000127931
kmer_TCTGCA	0.000127798
kmer_GACGGG	0.000127529
kmer_GCACCC	0.000127312
kmer_ACCAT	0.000127272
kmer_TAGCT	0.00012719
kmer_GGGCAA	0.000126951
kmer_ACTGGC	0.000126894
kmer_AAGTC	0.000126887
kmer_GGAAGG	0.000126869
kmer_GCGAGG	0.000126785
kmer_TCGTG	0.000126742
kmer_CTCGTT	0.000126541
kmer_CTTAT	0.000126526
kmer_ATTTGT	0.000126506
kmer_GCGCCA	0.000126482
kmer_TTCCTC	0.000126473
kmer_CCCACT	0.000126326
kmer_GCCGCA	0.000126321
kmer_GCGCGA	0.0001263
kmer_CGGCAC	0.000126239
kmer_GGCGGT	0.00012619
kmer_ACCGCC	0.000125926
kmer_CCGCGA	0.00012588
kmer_TGCGA	0.000125822
kmer_TTCAC	0.000125772
kmer_AGCCAT	0.000125704
kmer_GCTAG	0.000125673
kmer_GCTAA	0.000125599
kmer_TGCCGG	0.000125513
kmer_CATCA	0.00012537
kmer_GGGTCG	0.000125307
kmer_GCCCAA	0.000125261
kmer_AGGCTG	0.000125102
kmer_CCTAC	0.000124975
kmer_GGTCA	0.000124969
kmer_CCTCGC	0.000124904
kmer_CACCCG	0.000124861
kmer_AACCA	0.000124861
kmer_GTGAAG	0.000124835
kmer_AGAAC	0.000124715
kmer_CCTCGA	0.000124703
kmer_TGCTGA	0.000124674
kmer_ATTGC	0.000124664
kmer_GACGGC	0.000124623
kmer_GGTGGG	0.000124617
kmer_CCATT	0.000124579
kmer_TAACTG	0.000124545
kmer_GCCGAC	0.000124519
kmer_CTTCTT	0.000124339
kmer_CTGTTC	0.000124317
kmer_CTTCAC	0.000124232
kmer_GGGGAT	0.000124123
kmer_GTCCCG	0.00012401
kmer_CGTCGC	0.000123989
kmer_AAGCGG	0.000123973
kmer_GCGGCA	0.000123869
kmer_AAAGT	0.00012384
kmer_AACTA	0.000123801
kmer_GGGTTT	0.000123766
kmer_CGCTCG	0.000123646
kmer_GAGGTC	0.000123606
kmer_CTAAG	0.000123493
kmer_ACTCA	0.00012348
kmer_TCAAGA	0.000123453
kmer_TCCCTT	0.000123322
kmer_TAAAA	0.000123274
kmer_GCCACT	0.000123156
kmer_CGACT	0.000123095
kmer_CTACCC	0.000123005
kmer_GCAAC	0.000122935
kmer_GAAGGG	0.000122871
kmer_GGCACT	0.000122794
kmer_ATCCA	0.000122756
kmer_CCACAC	0.000122683
kmer_TTCTA	0.000122603
kmer_TCCAA	0.000122592
kmer_CCTGCA	0.000122565
kmer_TTAAA	0.000122565
kmer_GGGGAA	0.000122544
kmer_CGTAG	0.000122535
kmer_ACACG	0.000122428
kmer_AACCAA	0.000122379
kmer_AGAAGA	0.000122243
kmer_CATAGC	0.000122237
kmer_TAGCCA	0.000122232
kmer_TCTAA	0.000122223
kmer_CGGGGA	0.000122194
kmer_GATTC	0.000122161
kmer_CGCCTT	0.000122159
kmer_AGCTA	0.000122158
kmer_GTTGGG	0.00012212
kmer_GCTGAC	0.000122029
kmer_TCGAC	0.000121853
kmer_CTGAGT	0.00012182
kmer_GACACA	0.000121769
kmer_TCTCCG	0.000121604
kmer_AGACAC	0.00012158
kmer_ATTGA	0.000121492
kmer_TAGGC	0.000121481
kmer_GCATC	0.000121476
kmer_TCGCGG	0.000121364
kmer_GCCTA	0.000121035
kmer_CGCCCT	0.000120826
kmer_AACTGT	0.000120777
kmer_AGTTGT	0.000120676
kmer_ATGTTT	0.000120605
kmer_TGTCG	0.000120589
kmer_GCTCGC	0.000120281
kmer_CCCCAT	0.00012015
kmer_ATCTT	0.000120137
kmer_ACGCGC	0.000120131
kmer_CGCGCA	0.000120028
kmer_CCATGT	0.000119923
kmer_CACTGA	0.000119909
kmer_AGGGGA	0.000119895
kmer_TTTTGG	0.000119788
kmer_AGTGGA	0.000119679
kmer_CTCTGG	0.000119619
kmer_CTCTA	0.000119495
kmer_ATGCGC	0.000119451
kmer_TCCGCT	0.000119451
kmer_GAGCGA	0.000119181
kmer_AGATC	0.000119047
kmer_AGGGCT	0.000118821
kmer_TCTGCC	0.000118779
kmer_GGCTCT	0.000118637
kmer_TAATG	0.000118556
kmer_TCCAGA	0.000118539
kmer_TTGCTG	0.000118406
kmer_TCCCAC	0.000118361
kmer_TTTAA	0.000118328
kmer_CCTGCT	0.00011831
kmer_TTCTCT	0.000118206
kmer_CTTAG	0.000118097
kmer_GGTGTG	0.000118096
kmer_CCCTGT	0.000118041
kmer_AAAAAG	0.00011804
kmer_CTGAAG	0.000117995
kmer_TACCA	0.000117773
kmer_GGTGAG	0.000117664
kmer_ACGTG	0.000117432
kmer_GTAAT	0.000117426
kmer_GAAATG	0.000117404
kmer_TCTTCC	0.000117402
kmer_TCGGCT	0.000117388
kmer_TGGAAC	0.000117281
kmer_CGTCCC	0.000117223
kmer_CTGACC	0.000117212
kmer_TGGGTG	0.000117164
kmer_TGCGCT	0.000117141
kmer_GGCACG	0.000117042
kmer_GCTTGG	0.000117017
kmer_GTAGT	0.000116975
kmer_TGAAGA	0.000116899
kmer_ATGAC	0.000116891
kmer_TTGAGG	0.000116767
kmer_CGGAAC	0.00011675
kmer_CCCGCT	0.000116691
kmer_AGCGAG	0.000116622
kmer_AAAGAC	0.000116478
kmer_GAGTGG	0.000116394
kmer_AGACG	0.000116387
kmer_CTCGGA	0.00011631
kmer_TCAGGC	0.000116095
kmer_GACGA	0.000116004
kmer_TACTG	0.000115976
kmer_TGAGCA	0.000115895
kmer_AAGGAC	0.000115844
kmer_TCTCTT	0.000115752
kmer_GTGGAG	0.000115701
kmer_CTCGA	0.000115661
kmer_CGCGAG	0.000115658
kmer_GAGCTT	0.000115565
kmer_CGCTTC	0.000115551
kmer_CAAGAT	0.000115533
kmer_GTAGC	0.00011552
kmer_CATCTG	0.000115427
kmer_CTACC	0.000115394
kmer_AGAATG	0.000115365
kmer_GACACG	0.000115254
kmer_GGAAAA	0.00011525
kmer_ATCTAA	0.00011514
kmer_GGAAGC	0.000115088
kmer_GGCAAT	0.000115071
kmer_CGGTCC	0.000114929
kmer_ACCTGT	0.000114924
kmer_TTCCCG	0.000114862
kmer_CCACTT	0.000114789
kmer_GGTTA	0.000114715
kmer_AGGGCA	0.000114668
[truncated: 3,496 more rows]
